# Supplementary material for: Network Pharmacology-Based Study on the Active Ingredients and Mechanism of Pan Ji Sheng Traditional Chinese Medicine Formula in the Treatment of Inflammation
Source: Hindawi journal article supplement (doi:10.1155/2022/5340933), 2022-09-28
Supplement: f1 [file 5340933.f1.zip]

| Herbal Medicine                  | Key Bioactive Ingredients   | Hub Targets |
|----------------------------------|-----------------------------|-------------|
| <i>Microctis Folium</i>          | kaempferol                  | CASP3       |
| <i>Polygonum chinense</i>        | kaempferol                  | CASP3       |
| <i>Polygonum chinense</i>        | luteolin                    | CASP3       |
| <i>Ecliptae Herba</i>            | acacetin                    | CASP3       |
| <i>Ecliptae Herba</i>            | luteolin                    | CASP3       |
| <i>Perilla Frutescens</i>        | luteolin                    | CASP3       |
| <i>Isatidis Radix</i>            | acacetin                    | CASP3       |
| <i>Chrysanthemi Flos</i>         | acacetin                    | CASP3       |
| <i>Chrysanthemi Flos</i>         | kaempferol                  | CASP3       |
| <i>Chrysanthemi Flos</i>         | luteolin                    | CASP3       |
| <i>Chrysanthemi Flos</i>         | naringenin                  | CASP3       |
| <i>Licorice</i>                  | kaempferol                  | CASP3       |
| <i>Licorice</i>                  | naringenin                  | CASP3       |
| <i>Chimonanthus salicifolius</i> | kaempferol                  | CASP3       |
| <i>Microctis Folium</i>          | kaempferol                  | AKT1        |
| <i>Polygonum chinense</i>        | kaempferol                  | AKT1        |
| <i>Polygonum chinense</i>        | 3-O-methylelagic acid       | AKT1        |
| <i>Polygonum chinense</i>        | 3,3'-Di-O-Methylelagic Acid | AKT1        |
| <i>Polygonum chinense</i>        | luteolin                    | AKT1        |
| <i>Ecliptae Herba</i>            | luteolin                    | AKT1        |
| <i>Perilla Frutescens</i>        | luteolin                    | AKT1        |
| <i>Chrysanthemi Flos</i>         | kaempferol                  | AKT1        |
| <i>Chrysanthemi Flos</i>         | luteolin                    | AKT1        |
| <i>Chrysanthemi Flos</i>         | naringenin                  | AKT1        |
| <i>Licorice</i>                  | kaempferol                  | AKT1        |
| <i>Licorice</i>                  | naringenin                  | AKT1        |
| <i>Chimonanthus salicifolius</i> | kaempferol                  | AKT1        |
| <i>Microctis Folium</i>          | kaempferol                  | JUN         |
| <i>Polygonum chinense</i>        | kaempferol                  | JUN         |
| <i>Polygonum chinense</i>        | luteolin                    | JUN         |
| <i>Ecliptae Herba</i>            | luteolin                    | JUN         |
| <i>Perilla Frutescens</i>        | luteolin                    | JUN         |
| <i>Chrysanthemi Flos</i>         | kaempferol                  | JUN         |
| <i>Chrysanthemi Flos</i>         | luteolin                    | JUN         |
| <i>Licorice</i>                  | formononetin                | JUN         |
| <i>Licorice</i>                  | kaempferol                  | JUN         |
| <i>Chimonanthus salicifolius</i> | kaempferol                  | JUN         |
| <i>Licorice</i>                  | licochalcone a              | STAT3       |
| <i>Polygonum chinense</i>        | luteolin                    | TP53        |
| <i>Ecliptae Herba</i>            | acacetin                    | TP53        |
| <i>Ecliptae Herba</i>            | luteolin                    | TP53        |
| <i>Perilla Frutescens</i>        | luteolin                    | TP53        |
| <i>Isatidis Radix</i>            | acacetin                    | TP53        |
| <i>Chrysanthemi Flos</i>         | acacetin                    | TP53        |
| <i>Chrysanthemi Flos</i>         | luteolin                    | TP53        |
| <i>Polygonum chinense</i>        | luteolin                    | MMP9        |
| <i>Ecliptae Herba</i>            | luteolin                    | MMP9        |
| <i>Perilla Frutescens</i>        | luteolin                    | MMP9        |
| <i>Chrysanthemi Flos</i>         | luteolin                    | MMP9        |
| <i>Polygonum chinense</i>        | luteolin                    | BCL2L1      |
| <i>Ecliptae Herba</i>            | luteolin                    | BCL2L1      |
| <i>Perilla Frutescens</i>        | luteolin                    | BCL2L1      |
| <i>Chrysanthemi Flos</i>         | luteolin                    | BCL2L1      |
| <i>Polygonum chinense</i>        | Quercetin                   | SRC         |
| <i>Polygonum chinense</i>        | 3-O-methylelagic acid       | SRC         |
| <i>Polygonum chinense</i>        | 3,3'-Di-O-Methylelagic Acid | SRC         |
| <i>Chimonanthus salicifolius</i> | Quercetin                   | SRC         |

|                           |                                                                                                               |          |
|---------------------------|---------------------------------------------------------------------------------------------------------------|----------|
| <i>Ecliptae Herba</i>     | acacetin                                                                                                      | CASP8    |
| <i>Isatidis Radix</i>     | acacetin                                                                                                      | CASP8    |
| <i>Chrysanthemi Flos</i>  | acacetin                                                                                                      | CASP8    |
| <i>Polygonum chinense</i> | 3-O-methylelagic acid                                                                                         | CCND1    |
| <i>Polygonum chinense</i> | 3,3'-Di-O-Methylelagic Acid                                                                                   | CCND1    |
| <i>Polygonum chinense</i> | luteolin                                                                                                      | CCND1    |
| <i>Ecliptae Herba</i>     | luteolin                                                                                                      | CCND1    |
| <i>Perilla Frutescens</i> | luteolin                                                                                                      | CCND1    |
| <i>Chrysanthemi Flos</i>  | luteolin                                                                                                      | CCND1    |
| <i>Licorice</i>           | licochalcone a                                                                                                | CCND1    |
| <i>Microctis Folium</i>   | isorhamnetin                                                                                                  | HSP90AA1 |
| <i>Microctis Folium</i>   | kaempferol                                                                                                    | HSP90AA1 |
| <i>Microctis Folium</i>   | 4',5-Dihydroxyflavone                                                                                         | HSP90AA1 |
| <i>Polygonum chinense</i> | kaempferol                                                                                                    | HSP90AA1 |
| <i>Polygonum chinense</i> | isorhamnetin                                                                                                  | HSP90AA1 |
| <i>Polygonum chinense</i> | luteolin                                                                                                      | HSP90AA1 |
| <i>Ecliptae Herba</i>     | acacetin                                                                                                      | HSP90AA1 |
| <i>Ecliptae Herba</i>     | butin                                                                                                         | HSP90AA1 |
| <i>Ecliptae Herba</i>     | 1,3,8,9-tetrahydroxybenzofurano[3,2-clchromen-6-one                                                           | HSP90AA1 |
| <i>Ecliptae Herba</i>     | 3'-O-Methylorobol                                                                                             | HSP90AA1 |
| <i>Ecliptae Herba</i>     | Pratensein                                                                                                    | HSP90AA1 |
| <i>Ecliptae Herba</i>     | wedelolactone                                                                                                 | HSP90AA1 |
| <i>Ecliptae Herba</i>     | luteolin                                                                                                      | HSP90AA1 |
| <i>Perilla Frutescens</i> | luteolin                                                                                                      | HSP90AA1 |
| <i>Isatidis Radix</i>     | acacetin                                                                                                      | HSP90AA1 |
| <i>Isatidis Radix</i>     | EUPATORIN                                                                                                     | HSP90AA1 |
| <i>Isatidis Radix</i>     | Dinatin                                                                                                       | HSP90AA1 |
| <i>Isatidis Radix</i>     | hydroxyindirubin                                                                                              | HSP90AA1 |
| <i>Isatidis Radix</i>     | (2Z)-2-(2-oxoindolin-3-ylidene)indolin-3-one                                                                  | HSP90AA1 |
| <i>Isatidis Radix</i>     | 2-(9-((3-methyl-2-oxopent-3-en-1-yl)oxy)-2-oxo-1,2,8,9-tetrahydrofuro[2,3-h]quinolin-8-yl)propan-2-yl acetate | HSP90AA1 |
| <i>Isatidis Radix</i>     | DFV                                                                                                           | HSP90AA1 |
| <i>Isatidis Radix</i>     | (E)-2-[(3-indole)cyanomethylene]-1,3-                                                                         | HSP90AA1 |
| <i>Isatidis Radix</i>     | neohesperidin qt                                                                                              | HSP90AA1 |
| <i>Isatidis Radix</i>     | Sinensetin                                                                                                    | HSP90AA1 |
| <i>Isatidis Radix</i>     | (E)-3-(3,5-dimethoxy-4-hydroxybenzylidene)-2-indolinone                                                       | HSP90AA1 |
| <i>Isatidis Radix</i>     | (E)-3-(3,5-dimethoxy-4-hydroxybenzylidene)-2-indolinone                                                       | HSP90AA1 |
| <i>Isatidis Radix</i>     | 3-[(3,5-dimethoxy-4-oxo-1-cyclohexa-2,5-dienylidene)methyl]-2,4-dihydro-1H-pyrrrol[2,1-b]quinazolin-9-one     | HSP90AA1 |
| <i>Chrysanthemi Flos</i>  | acacetin                                                                                                      | HSP90AA1 |
| <i>Chrysanthemi Flos</i>  | Chryseriol                                                                                                    | HSP90AA1 |
| <i>Chrysanthemi Flos</i>  | isorhamnetin                                                                                                  | HSP90AA1 |
| <i>Chrysanthemi Flos</i>  | kaempferol                                                                                                    | HSP90AA1 |
| <i>Chrysanthemi Flos</i>  | 5,7-dihydroxy-2-(3-hydroxy-4-methoxyphenyl)chroman-4-one                                                      | HSP90AA1 |
| <i>Chrysanthemi Flos</i>  | luteolin                                                                                                      | HSP90AA1 |
| <i>Chrysanthemi Flos</i>  | EUPATORIN                                                                                                     | HSP90AA1 |
| <i>Chrysanthemi Flos</i>  | Diosmetin                                                                                                     | HSP90AA1 |
| <i>Chrysanthemi Flos</i>  | naringenin                                                                                                    | HSP90AA1 |
| <i>Chrysanthemi Flos</i>  | Artemetin                                                                                                     | HSP90AA1 |

|          |                                                                                             |          |
|----------|---------------------------------------------------------------------------------------------|----------|
| Licorice | Jaranol                                                                                     | HSP90AA1 |
| Licorice | isorhamnetin                                                                                | HSP90AA1 |
| Licorice | formononetin                                                                                | HSP90AA1 |
| Licorice | Calycosin                                                                                   | HSP90AA1 |
| Licorice | kaempferol                                                                                  | HSP90AA1 |
| Licorice | licochalcone a                                                                              | HSP90AA1 |
| Licorice | Inermine                                                                                    | HSP90AA1 |
| Licorice | DFV                                                                                         | HSP90AA1 |
| Licorice | Medicarpin                                                                                  | HSP90AA1 |
| Licorice | Lupiwighteone                                                                               | HSP90AA1 |
| Licorice | 7-Methoxy-2-methyl isoflavone                                                               | HSP90AA1 |
| Licorice | naringenin                                                                                  | HSP90AA1 |
| Licorice | glyasperin B                                                                                | HSP90AA1 |
| Licorice | glyasperin F                                                                                | HSP90AA1 |
| Licorice | Isotrifoliol                                                                                | HSP90AA1 |
| Licorice | Semilicoisoflavone B                                                                        | HSP90AA1 |
| Licorice | Glepidotin A                                                                                | HSP90AA1 |
| Licorice | Glepidotin B                                                                                | HSP90AA1 |
| Licorice | Glypallichalcone                                                                            | HSP90AA1 |
| Licorice | 8-(6-hydroxy-2-benzofuranyl)-2,2-dimethyl-5-chromenol                                       | HSP90AA1 |
| Licorice | Licochalcone B                                                                              | HSP90AA1 |
| Licorice | licochalcone G                                                                              | HSP90AA1 |
| Licorice | Gancaonin A                                                                                 | HSP90AA1 |
| Licorice | Gancaonin B                                                                                 | HSP90AA1 |
| Licorice | 3-(3,4-dihydroxyphenyl)-5,7-dihydroxy-8-(3-methylbut-2-enyl)chromone                        | HSP90AA1 |
| Licorice | 5,7-dihydroxy-3-(4-methoxyphenyl)-8-(3-methylbut-2-enyl)chromone                            | HSP90AA1 |
| Licorice | 2-(3,4-dihydroxyphenyl)-5,7-dihydroxy-6-(3-methylbut-2-enyl)chromone                        | HSP90AA1 |
| Licorice | Licocoumarone                                                                               | HSP90AA1 |
| Licorice | Licoisoflavone                                                                              | HSP90AA1 |
| Licorice | licoisoflavanone                                                                            | HSP90AA1 |
| Licorice | (E)-3-[3,4-dihydroxy-5-(3-methylbut-2-enyl)phenyl]-1-(2,4-dihydroxyphenyl)propan-2-en-1-one | HSP90AA1 |
| Licorice | Glyzaglabrin                                                                                | HSP90AA1 |
| Licorice | Glabranin                                                                                   | HSP90AA1 |
| Licorice | 1,3-dihydroxy-9-methoxy-6-benzofuranol[3,2-c]chromenone                                     | HSP90AA1 |
| Licorice | 1,3-dihydroxy-8,9-dimethoxy-6-benzofuranol[3,2-c]chromenone                                 | HSP90AA1 |
| Licorice | Eurycarpin A                                                                                | HSP90AA1 |
| Licorice | Sigmoidin-B                                                                                 | HSP90AA1 |
| Licorice | (2R)-7-hydroxy-2-(4-hydroxyphenyl)chroman-4-one                                             | HSP90AA1 |
| Licorice | (2S)-7-hydroxy-2-(4-hydroxyphenyl)-8-(3-methylbut-2-enyl)chroman-4-one                      | HSP90AA1 |
| Licorice | Isolicoflavonol                                                                             | HSP90AA1 |
| Licorice | 1-Methoxyphaseollidin                                                                       | HSP90AA1 |
| Licorice | Quercetin der.                                                                              | HSP90AA1 |
| Licorice | 6-prenylated eriodictyol                                                                    | HSP90AA1 |
| Licorice | 7-Acetoxy-2-methylisoflavone                                                                | HSP90AA1 |
| Licorice | 8-prenylated eriodictyol                                                                    | HSP90AA1 |
| Licorice | Gancaonin G                                                                                 | HSP90AA1 |
| Licorice | Gancaonin H                                                                                 | HSP90AA1 |

|                                  |                                                                                                               |          |
|----------------------------------|---------------------------------------------------------------------------------------------------------------|----------|
| <i>Licorice</i>                  | Licoagrocarpin                                                                                                | HSP90AA1 |
| <i>Licorice</i>                  | Glyasperins M                                                                                                 | HSP90AA1 |
| <i>Licorice</i>                  | Odoratin                                                                                                      | HSP90AA1 |
| <i>Licorice</i>                  | Phaseol                                                                                                       | HSP90AA1 |
| <i>Chimonanthus salicifolius</i> | kaempferol                                                                                                    | HSP90AA1 |
| <i>Microctis Folium</i>          | isorhamnetin                                                                                                  | PTGS2    |
| <i>Microctis Folium</i>          | kaempferol                                                                                                    | PTGS2    |
| <i>Microctis Folium</i>          | 4',5-Dihydroxyflavone                                                                                         | PTGS2    |
| <i>Polygonum chinense</i>        | kaempferol                                                                                                    | PTGS2    |
| <i>Polygonum chinense</i>        | kaempferol-7-O-glucoside                                                                                      | PTGS2    |
| <i>Polygonum chinense</i>        | isorhamnetin                                                                                                  | PTGS2    |
| <i>Polygonum chinense</i>        | luteolin                                                                                                      | PTGS2    |
| <i>Ecliptae Herba</i>            | acacetin                                                                                                      | PTGS2    |
| <i>Ecliptae Herba</i>            | butin                                                                                                         | PTGS2    |
| <i>Ecliptae Herba</i>            | 3'-O-Methylorobol                                                                                             | PTGS2    |
| <i>Ecliptae Herba</i>            | Pratensein                                                                                                    | PTGS2    |
| <i>Ecliptae Herba</i>            | demethylwedolactone                                                                                           | PTGS2    |
| <i>Ecliptae Herba</i>            | luteolin                                                                                                      | PTGS2    |
| <i>Perilla Frutescens</i>        | luteolin                                                                                                      | PTGS2    |
| <i>Isatidis Radix</i>            | acacetin                                                                                                      | PTGS2    |
| <i>Isatidis Radix</i>            | EUPATORIN                                                                                                     | PTGS2    |
| <i>Isatidis Radix</i>            | Dinatin                                                                                                       | PTGS2    |
| <i>Isatidis Radix</i>            | quindoline                                                                                                    | PTGS2    |
| <i>Isatidis Radix</i>            | hydroxyindirubin                                                                                              | PTGS2    |
| <i>Isatidis Radix</i>            | Indigo                                                                                                        | PTGS2    |
| <i>Isatidis Radix</i>            | (2Z)-2-(2-oxoindolin-3-ylidene)indolin-3-one                                                                  | PTGS2    |
| <i>Isatidis Radix</i>            | 2-(9-((3-methyl-2-oxopent-3-en-1-yl)oxy)-2-oxo-1,2,8,9-tetrahydrofuro[2,3-h]quinolin-8-yl)propan-2-yl acetate | PTGS2    |
| <i>Isatidis Radix</i>            | DFV                                                                                                           | PTGS2    |
| <i>Isatidis Radix</i>            | (E)-2-[(3-indole)cyanomethylene-1,3-                                                                          | PTGS2    |
| <i>Isatidis Radix</i>            | neohesperidin_qt                                                                                              | PTGS2    |
| <i>Isatidis Radix</i>            | Sinensetin                                                                                                    | PTGS2    |
| <i>Isatidis Radix</i>            | 6-(3-oxoindolin-2-ylidene)indolo[2,1-b]quinazolin-12-one                                                      | PTGS2    |
| <i>Isatidis Radix</i>            | (E)-3-(3,5-dimethoxy-4-hydroxybenzylidene)-2-indolinone                                                       | PTGS2    |
| <i>Isatidis Radix</i>            | (E)-3-(3,5-dimethoxy-4-hydroxybenzylidene)-2-indolinone                                                       | PTGS2    |
| <i>Isatidis Radix</i>            | 3-[(3,5-dimethoxy-4-oxo-1-cyclohexa-2,5-dienylidene)methyl]-2,4-dihydro-1H-pyrazolo[2,1-b]quinazolin-9-one    | PTGS2    |
| <i>Chrysanthemi Flos</i>         | [(1S,5S,7S)-7-acetoxy-5-isopropenyl-2,8-dimethylene-cyclodecyl]acetate                                        | PTGS2    |
| <i>Chrysanthemi Flos</i>         | acacetin                                                                                                      | PTGS2    |
| <i>Chrysanthemi Flos</i>         | Chryseriol                                                                                                    | PTGS2    |
| <i>Chrysanthemi Flos</i>         | isorhamnetin                                                                                                  | PTGS2    |
| <i>Chrysanthemi Flos</i>         | kaempferol                                                                                                    | PTGS2    |
| <i>Chrysanthemi Flos</i>         | 5,7-dihydroxy-2-(3-hydroxy-4-methoxyphenyl)chroman-4-one                                                      | PTGS2    |
| <i>Chrysanthemi Flos</i>         | luteolin                                                                                                      | PTGS2    |
| <i>Chrysanthemi Flos</i>         | EUPATORIN                                                                                                     | PTGS2    |
| <i>Chrysanthemi Flos</i>         | Diosmetin                                                                                                     | PTGS2    |
| <i>Chrysanthemi Flos</i>         | naringenin                                                                                                    | PTGS2    |

|                          |                                                                                                |       |
|--------------------------|------------------------------------------------------------------------------------------------|-------|
| <i>Chrysanthemi Flos</i> | Artemetin                                                                                      | PTGS2 |
| <i>Licorice</i>          | Jaranol                                                                                        | PTGS2 |
| <i>Licorice</i>          | isorhamnetin                                                                                   | PTGS2 |
| <i>Licorice</i>          | formononetin                                                                                   | PTGS2 |
| <i>Licorice</i>          | Calycosin                                                                                      | PTGS2 |
| <i>Licorice</i>          | kaempferol                                                                                     | PTGS2 |
| <i>Licorice</i>          | licochalcone a                                                                                 | PTGS2 |
| <i>Licorice</i>          | Inermine                                                                                       | PTGS2 |
| <i>Licorice</i>          | DFV                                                                                            | PTGS2 |
| <i>Licorice</i>          | Glycyrol                                                                                       | PTGS2 |
| <i>Licorice</i>          | Medicarpin                                                                                     | PTGS2 |
| <i>Licorice</i>          | Lupiwighteone                                                                                  | PTGS2 |
| <i>Licorice</i>          | 7-Methoxy-2-methyl isoflavone                                                                  | PTGS2 |
| <i>Licorice</i>          | naringenin                                                                                     | PTGS2 |
| <i>Licorice</i>          | glyasperin B                                                                                   | PTGS2 |
| <i>Licorice</i>          | glyasperin F                                                                                   | PTGS2 |
| <i>Licorice</i>          | Isotrifoliol                                                                                   | PTGS2 |
| <i>Licorice</i>          | (E)-1-(2,4-dihydroxyphenyl)-3-(2,2-dimethylchromen-6-yl)prop-2-en-1-one                        | PTGS2 |
| <i>Licorice</i>          | (2S)-6-(2,4-dihydroxyphenyl)-2-(2-hydroxypropan-2-yl)-4-methoxy-2,3-dihydrofuro[3,2-c]chromene | PTGS2 |
| <i>Licorice</i>          | Semilicoisoflavone B                                                                           | PTGS2 |
| <i>Licorice</i>          | Glepidotin A                                                                                   | PTGS2 |
| <i>Licorice</i>          | Glepidotin B                                                                                   | PTGS2 |
| <i>Licorice</i>          | Glypallichalcone                                                                               | PTGS2 |
| <i>Licorice</i>          | 8-(6-hydroxy-2-benzofuranyl)-2,2-dimethyl-5-chromenol                                          | PTGS2 |
| <i>Licorice</i>          | Licochalcone B                                                                                 | PTGS2 |
| <i>Licorice</i>          | licochalcone G                                                                                 | PTGS2 |
| <i>Licorice</i>          | Licoricone                                                                                     | PTGS2 |
| <i>Licorice</i>          | Gancaonin A                                                                                    | PTGS2 |
| <i>Licorice</i>          | Gancaonin B                                                                                    | PTGS2 |
| <i>Licorice</i>          | 3-(3,4-dihydroxyphenyl)-5,7-dihydroxy-8-(3-methylbut-2-enyl)chromone                           | PTGS2 |
| <i>Licorice</i>          | 5,7-dihydroxy-3-(4-methoxyphenyl)-8-(3-methylbut-2-enyl)chromone                               | PTGS2 |
| <i>Licorice</i>          | 2-(3,4-dihydroxyphenyl)-5,7-dihydroxy-6-(3-methylbut-2-enyl)chromone                           | PTGS2 |
| <i>Licorice</i>          | Licoisoflavone                                                                                 | PTGS2 |
| <i>Licorice</i>          | Licoisoflavone B                                                                               | PTGS2 |
| <i>Licorice</i>          | licoisoflavanone                                                                               | PTGS2 |
| <i>Licorice</i>          | shinpterocarpin                                                                                | PTGS2 |
| <i>Licorice</i>          | (E)-3-[3,4-dihydroxy-5-(3-methylbut-2-enyl)phenyl]-1-(2,4-dihydroxyphenyl)prop-2-en-1-one      | PTGS2 |
| <i>Licorice</i>          | Glyzaglabrin                                                                                   | PTGS2 |
| <i>Licorice</i>          | Glabranin                                                                                      | PTGS2 |
| <i>Licorice</i>          | Glabrone                                                                                       | PTGS2 |
| <i>Licorice</i>          | Eurycarpin A                                                                                   | PTGS2 |
| <i>Licorice</i>          | Sigmoidin-B                                                                                    | PTGS2 |
| <i>Licorice</i>          | (2R)-7-hydroxy-2-(4-hydroxyphenyl)chroman-4-one                                                | PTGS2 |
| <i>Licorice</i>          | (2S)-7-hydroxy-2-(4-hydroxyphenyl)-8-(3-methylbut-2-enyl)chroman-4-one                         | PTGS2 |
| <i>Licorice</i>          | Isoglycyrol                                                                                    | PTGS2 |

|                                  |                              |        |
|----------------------------------|------------------------------|--------|
| <i>Licorice</i>                  | Isolicoflavonol              | PTGS2  |
| <i>Licorice</i>                  | HMO                          | PTGS2  |
| <i>Licorice</i>                  | 1-Methoxyphaseollidin        | PTGS2  |
| <i>Licorice</i>                  | Quercetin der.               | PTGS2  |
| <i>Licorice</i>                  | 6-prenylated eriodictyol     | PTGS2  |
| <i>Licorice</i>                  | 7-Acetoxy-2-methylisoflavone | PTGS2  |
| <i>Licorice</i>                  | 8-prenylated eriodictyol     | PTGS2  |
| <i>Licorice</i>                  | Gancaonin G                  | PTGS2  |
| <i>Licorice</i>                  | Gancaonin H                  | PTGS2  |
| <i>Licorice</i>                  | Licoagrocarpin               | PTGS2  |
| <i>Licorice</i>                  | Glyasperins M                | PTGS2  |
| <i>Licorice</i>                  | Licoagroisoflavone           | PTGS2  |
| <i>Licorice</i>                  | Odoratin                     | PTGS2  |
| <i>Licorice</i>                  | Phaseol                      | PTGS2  |
| <i>Licorice</i>                  | Xambioona                    | PTGS2  |
| <i>Chimonanthus salicifolius</i> | kaempferol                   | PTGS2  |
| <i>Polygonum chinense</i>        | luteolin                     | CASP9  |
| <i>Ecliptae Herba</i>            | luteolin                     | CASP9  |
| <i>Perilla Frutescens</i>        | luteolin                     | CASP9  |
| <i>Chrysanthemi Flos</i>         | luteolin                     | CASP9  |
| <i>Chrysanthemi Flos</i>         | naringenin                   | MAPK3  |
| <i>Licorice</i>                  | naringenin                   | MAPK3  |
| <i>Microctis Folium</i>          | kaempferol                   | MAPK8  |
| <i>Polygonum chinense</i>        | kaempferol                   | MAPK8  |
| <i>Chrysanthemi Flos</i>         | kaempferol                   | MAPK8  |
| <i>Licorice</i>                  | kaempferol                   | MAPK8  |
| <i>Chimonanthus salicifolius</i> | kaempferol                   | MAPK8  |
| <i>Polygonum chinense</i>        | Quercetin                    | EGFR   |
| <i>Polygonum chinense</i>        | 3-O-methyllellagic acid      | EGFR   |
| <i>Polygonum chinense</i>        | kaempferol-7-O-glucoside     | EGFR   |
| <i>Polygonum chinense</i>        | luteolin                     | EGFR   |
| <i>Ecliptae Herba</i>            | luteolin                     | EGFR   |
| <i>Perilla Frutescens</i>        | luteolin                     | EGFR   |
| <i>Chrysanthemi Flos</i>         | luteolin                     | EGFR   |
| <i>Chimonanthus salicifolius</i> | Quercetin                    | EGFR   |
| <i>Polygonum chinense</i>        | luteolin                     | IL6    |
| <i>Ecliptae Herba</i>            | luteolin                     | IL6    |
| <i>Perilla Frutescens</i>        | luteolin                     | IL6    |
| <i>Chrysanthemi Flos</i>         | luteolin                     | IL6    |
| <i>Polygonum chinense</i>        | kaempferol-7-O-glucoside     | TNF    |
| <i>Chimonanthus salicifolius</i> | luteolin-5-O-glucoside       | TNF    |
| <i>Polygonum chinense</i>        | luteolin                     | NFKBIA |
| <i>Ecliptae Herba</i>            | luteolin                     | NFKBIA |
| <i>Perilla Frutescens</i>        | luteolin                     | NFKBIA |
| <i>Chrysanthemi Flos</i>         | luteolin                     | NFKBIA |
| <i>Polygonum chinense</i>        | luteolin                     | MCL1   |
| <i>Ecliptae Herba</i>            | luteolin                     | MCL1   |
| <i>Perilla Frutescens</i>        | luteolin                     | MCL1   |
| <i>Chrysanthemi Flos</i>         | luteolin                     | MCL1   |
| <i>Microctis Folium</i>          | isorhamnetin                 | RELA   |
| <i>Microctis Folium</i>          | kaempferol                   | RELA   |
| <i>Polygonum chinense</i>        | kaempferol                   | RELA   |
| <i>Polygonum chinense</i>        | isorhamnetin                 | RELA   |
| <i>Polygonum chinense</i>        | luteolin                     | RELA   |
| <i>Ecliptae Herba</i>            | acacetin                     | RELA   |
| <i>Ecliptae Herba</i>            | luteolin                     | RELA   |
| <i>Perilla Frutescens</i>        | luteolin                     | RELA   |
| <i>Isatidis Radix</i>            | acacetin                     | RELA   |

|                                  |                                                                                      |      |
|----------------------------------|--------------------------------------------------------------------------------------|------|
| <i>Chrysanthemi Flos</i>         | acacetin                                                                             | RELA |
| <i>Chrysanthemi Flos</i>         | isorhamnetin                                                                         | RELA |
| <i>Chrysanthemi Flos</i>         | kaempferol                                                                           | RELA |
| <i>Chrysanthemi Flos</i>         | luteolin                                                                             | RELA |
| <i>Chrysanthemi Flos</i>         | naringenin                                                                           | RELA |
| <i>Licorice</i>                  | isorhamnetin                                                                         | RELA |
| <i>Licorice</i>                  | kaempferol                                                                           | RELA |
| <i>Licorice</i>                  | licochalcone a                                                                       | RELA |
| <i>Licorice</i>                  | naringenin                                                                           | RELA |
| <i>Chimonanthus salicifolius</i> | kaempferol                                                                           | RELA |
| <i>Microctis Folium</i>          | isorhamnetin                                                                         | ESR1 |
| <i>Polygonum chinense</i>        | isorhamnetin                                                                         | ESR1 |
| <i>Ecliptae Herba</i>            | 3'-O-Methylorobol                                                                    | ESR1 |
| <i>Ecliptae Herba</i>            | Pratensein                                                                           | ESR1 |
| <i>Ecliptae Herba</i>            | wedelolactone                                                                        | ESR1 |
| <i>Isatidis Radix</i>            | hydroxyindirubin                                                                     | ESR1 |
| <i>Isatidis Radix</i>            | (2Z)-2-(2-oxoindolin-3-ylidene)indolin-3-one                                         | ESR1 |
| <i>Isatidis Radix</i>            | DFV                                                                                  | ESR1 |
| <i>Isatidis Radix</i>            | (E)-2-[(3-indole)cyanomethylene]-3-                                                  | ESR1 |
| <i>Isatidis Radix</i>            | 6-(3-oxoindolin-2-ylidene)indolo[2,1-b]quinazolin-12-one                             | ESR1 |
| <i>Chrysanthemi Flos</i>         | Chryseriol                                                                           | ESR1 |
| <i>Chrysanthemi Flos</i>         | isorhamnetin                                                                         | ESR1 |
| <i>Chrysanthemi Flos</i>         | naringenin                                                                           | ESR1 |
| <i>Chrysanthemi Flos</i>         | Artemetin                                                                            | ESR1 |
| <i>Licorice</i>                  | isorhamnetin                                                                         | ESR1 |
| <i>Licorice</i>                  | formononetin                                                                         | ESR1 |
| <i>Licorice</i>                  | Calycosin                                                                            | ESR1 |
| <i>Licorice</i>                  | licochalcone a                                                                       | ESR1 |
| <i>Licorice</i>                  | DFV                                                                                  | ESR1 |
| <i>Licorice</i>                  | Glycyrol                                                                             | ESR1 |
| <i>Licorice</i>                  | Medicarpin                                                                           | ESR1 |
| <i>Licorice</i>                  | Lupiwighteone                                                                        | ESR1 |
| <i>Licorice</i>                  | 7-Methoxy-2-methyl isoflavone                                                        | ESR1 |
| <i>Licorice</i>                  | naringenin                                                                           | ESR1 |
| <i>Licorice</i>                  | glyasperin B                                                                         | ESR1 |
| <i>Licorice</i>                  | glyasperin F                                                                         | ESR1 |
| <i>Licorice</i>                  | Isotrifoliol                                                                         | ESR1 |
| <i>Licorice</i>                  | (E)-1-(2,4-dihydroxyphenyl)-3-(2,2-dimethylchromen-6-yl)prop-2-en-1-one              | ESR1 |
| <i>Licorice</i>                  | (2S)-6-(2,4-dihydroxyphenyl)-2-(2-hydroxypropan-2-yl)-4-methoxy-2,3-dihydrofuro[3,2- | ESR1 |
| <i>Licorice</i>                  | Semilicoisoflavone B                                                                 | ESR1 |
| <i>Licorice</i>                  | Glepidotin A                                                                         | ESR1 |
| <i>Licorice</i>                  | Glepidotin B                                                                         | ESR1 |
| <i>Licorice</i>                  | Glypallichalcone                                                                     | ESR1 |
| <i>Licorice</i>                  | 8-(6-hydroxy-2-benzofuranyl)-2,2-dimethyl-5-chromenol                                | ESR1 |
| <i>Licorice</i>                  | Licochalcone B                                                                       | ESR1 |
| <i>Licorice</i>                  | licochalcone G                                                                       | ESR1 |
| <i>Licorice</i>                  | Licoricone                                                                           | ESR1 |
| <i>Licorice</i>                  | Gancaonin A                                                                          | ESR1 |
| <i>Licorice</i>                  | Gancaonin B                                                                          | ESR1 |

|                                  |                                                                                         |        |
|----------------------------------|-----------------------------------------------------------------------------------------|--------|
| <i>Licorice</i>                  | 3-(3,4-dihydroxyphenyl)-5,7-dihydroxy-8-(3-methylbut-2-enyl)chromone                    | ESR1   |
| <i>Licorice</i>                  | 5,7-dihydroxy-3-(4-methoxyphenyl)-8-(3-methylbut-2-enyl)chromone                        | ESR1   |
| <i>Licorice</i>                  | Licocoumarone                                                                           | ESR1   |
| <i>Licorice</i>                  | Licoisoflavone                                                                          | ESR1   |
| <i>Licorice</i>                  | Licoisoflavone B                                                                        | ESR1   |
| <i>Licorice</i>                  | lcoisoflavanone                                                                         | ESR1   |
| <i>Licorice</i>                  | shinpterocarpin                                                                         | ESR1   |
| <i>Licorice</i>                  | (E)-3-[3,4-dihydroxy-5-(3-methylbut-2-enyl)phenyl]-1-(2,4-dihydroxyphenyl)chroman-2-one | ESR1   |
| <i>Licorice</i>                  | Glyzaglabrin                                                                            | ESR1   |
| <i>Licorice</i>                  | Glabranin                                                                               | ESR1   |
| <i>Licorice</i>                  | Glabrone                                                                                | ESR1   |
| <i>Licorice</i>                  | 1,3-dihydroxy-9-methoxy-6-benzofuranof[3,2-c]chromenone                                 | ESR1   |
| <i>Licorice</i>                  | 1,3-dihydroxy-8,9-dimethoxy-6-benzofuranof[3,2-c]chromenone                             | ESR1   |
| <i>Licorice</i>                  | Eurycarpin A                                                                            | ESR1   |
| <i>Licorice</i>                  | Sigmoidin-B                                                                             | ESR1   |
| <i>Licorice</i>                  | (2R)-7-hydroxy-2-(4-hydroxyphenyl)chroman-4-one                                         | ESR1   |
| <i>Licorice</i>                  | (2S)-7-hydroxy-2-(4-hydroxyphenyl)-8-(3-methylbut-2-enyl)chroman-4-one                  | ESR1   |
| <i>Licorice</i>                  | Isoglycyrol                                                                             | ESR1   |
| <i>Licorice</i>                  | Isolicoflavanol                                                                         | ESR1   |
| <i>Licorice</i>                  | HMO                                                                                     | ESR1   |
| <i>Licorice</i>                  | 1-Methoxyphaseollidin                                                                   | ESR1   |
| <i>Licorice</i>                  | Quercetin der.                                                                          | ESR1   |
| <i>Licorice</i>                  | 6-prenylated eriodictyol                                                                | ESR1   |
| <i>Licorice</i>                  | 7-Acetoxy-2-methylisoflavone                                                            | ESR1   |
| <i>Licorice</i>                  | 8-prenylated eriodictyol                                                                | ESR1   |
| <i>Licorice</i>                  | Gancaonin G                                                                             | ESR1   |
| <i>Licorice</i>                  | Gancaonin H                                                                             | ESR1   |
| <i>Licorice</i>                  | Licoagrocarpin                                                                          | ESR1   |
| <i>Licorice</i>                  | Glyasperins M                                                                           | ESR1   |
| <i>Licorice</i>                  | Licoagroisoflavone                                                                      | ESR1   |
| <i>Licorice</i>                  | Odoratin                                                                                | ESR1   |
| <i>Licorice</i>                  | Phaseol                                                                                 | ESR1   |
| <i>Licorice</i>                  | Xambioona                                                                               | ESR1   |
| <i>Licorice</i>                  | formononetin                                                                            | SIRT1  |
| <i>Microctis Folium</i>          | kaempferol                                                                              | STAT1  |
| <i>Polygonum chinense</i>        | kaempferol                                                                              | STAT1  |
| <i>Chrysanthemi Flos</i>         | kaempferol                                                                              | STAT1  |
| <i>Licorice</i>                  | kaempferol                                                                              | STAT1  |
| <i>Chimonanthus salicifolius</i> | kaempferol                                                                              | STAT1  |
| <i>Microctis Folium</i>          | isorhamnetin                                                                            | MAPK14 |
| <i>Polygonum chinense</i>        | isorhamnetin                                                                            | MAPK14 |
| <i>Ecliptae Herba</i>            | 3'-O-Methylorobol                                                                       | MAPK14 |
| <i>Ecliptae Herba</i>            | Pratensein                                                                              | MAPK14 |
| <i>Isatidis Radix</i>            | hydroxyindirubin                                                                        | MAPK14 |
| <i>Isatidis Radix</i>            | (2Z)-2-(2-oxoindolin-3-ylidene)indolin-3-one                                            | MAPK14 |
| <i>Isatidis Radix</i>            | (E)-2-[(3-indole)cyanomethylene]-1,3-                                                   | MAPK14 |
| <i>Chrysanthemi Flos</i>         | Chryseriol                                                                              | MAPK14 |
| <i>Chrysanthemi Flos</i>         | isorhamnetin                                                                            | MAPK14 |



|                          |                                                                                                |        |
|--------------------------|------------------------------------------------------------------------------------------------|--------|
| <i>Chrysanthemi Flos</i> | Artemetin                                                                                      | MAPK14 |
| <i>Licorice</i>          | isorhamnetin                                                                                   | MAPK14 |
| <i>Licorice</i>          | formononetin                                                                                   | MAPK14 |
| <i>Licorice</i>          | Calycosin                                                                                      | MAPK14 |
| <i>Licorice</i>          | licochalcone a                                                                                 | MAPK14 |
| <i>Licorice</i>          | Glycyrol                                                                                       | MAPK14 |
| <i>Licorice</i>          | Lupiwighteone                                                                                  | MAPK14 |
| <i>Licorice</i>          | 7-Methoxy-2-methyl isoflavone                                                                  | MAPK14 |
| <i>Licorice</i>          | glyasperin F                                                                                   | MAPK14 |
| <i>Licorice</i>          | Isotrifoliol                                                                                   | MAPK14 |
| <i>Licorice</i>          | (E)-1-(2,4-dihydroxyphenyl)-3-(2,2-dimethylchromen-6-yl)prop-2-en-1-one                        | MAPK14 |
| <i>Licorice</i>          | (2S)-6-(2,4-dihydroxyphenyl)-2-(2-hydroxypropan-2-yl)-4-methoxy-2,3-dihydrofuro[3,2-c]chromene | MAPK14 |
| <i>Licorice</i>          | Glepidotin A                                                                                   | MAPK14 |
| <i>Licorice</i>          | Glypallichalcone                                                                               | MAPK14 |
| <i>Licorice</i>          | Licochalcone B                                                                                 | MAPK14 |
| <i>Licorice</i>          | licochalcone G                                                                                 | MAPK14 |
| <i>Licorice</i>          | 3-(3,4-dihydroxyphenyl)-5,7-dihydroxy-8-(3-methylbut-2-enyl)chromone                           | MAPK14 |
| <i>Licorice</i>          | 5,7-dihydroxy-3-(4-methoxyphenyl)-8-(3-methylbut-2-enyl)chromone                               | MAPK14 |
| <i>Licorice</i>          | Licoisoflavone                                                                                 | MAPK14 |
| <i>Licorice</i>          | shinpterocarpin                                                                                | MAPK14 |
| <i>Licorice</i>          | (E)-3-[3,4-dihydroxy-5-(3-methylbut-2-enyl)phenyl]-1-(2,4-dihydroxyphenyl)prop-2-en-1-one      | MAPK14 |
| <i>Licorice</i>          | Glyzaglabrin                                                                                   | MAPK14 |
| <i>Licorice</i>          | Glabrone                                                                                       | MAPK14 |
| <i>Licorice</i>          | 1,3-dihydroxy-9-methoxy-6-benzofuranol[3,2-c]chromenone                                        | MAPK14 |
| <i>Licorice</i>          | 1,3-dihydroxy-8,9-dimethoxy-6-benzofuranol[3,2-c]chromenone                                    | MAPK14 |
| <i>Licorice</i>          | Eurycarpin A                                                                                   | MAPK14 |
| <i>Licorice</i>          | HMO                                                                                            | MAPK14 |
| <i>Licorice</i>          | 1-Methoxyphaseollidin                                                                          | MAPK14 |
| <i>Licorice</i>          | Quercetin der.                                                                                 | MAPK14 |
| <i>Licorice</i>          | 7-Acetoxy-2-methylisoflavone                                                                   | MAPK14 |
| <i>Licorice</i>          | Gancaonin G                                                                                    | MAPK14 |
| <i>Licorice</i>          | Licoagrocarpin                                                                                 | MAPK14 |
| <i>Licorice</i>          | Licoagroisoflavone                                                                             | MAPK14 |
| <i>Licorice</i>          | Odoratin                                                                                       | MAPK14 |
| <i>Licorice</i>          | Phaseol                                                                                        | MAPK14 |
