# Supplementary material for: Network Pharmacology-Based Study on the Active Ingredients and Mechanism of Pan Ji Sheng Traditional Chinese Medicine Formula in the Treatment of Inflammation
Source: Hindawi journal article supplement (doi:10.1155/2022/5340933), 2022-09-28
Supplement: f1 [file 5340933.f1.zip]

| Herbal Medicine         | Bioactive Ingredients | Target Proteins |
|-------------------------|-----------------------|-----------------|
| <i>Microctis Folium</i> | isorhamnetin          | NOS2            |
| <i>Microctis Folium</i> | isorhamnetin          | PTGS1           |
| <i>Microctis Folium</i> | isorhamnetin          | ESR1            |
| <i>Microctis Folium</i> | isorhamnetin          | AR              |
| <i>Microctis Folium</i> | isorhamnetin          | PPARG           |
| <i>Microctis Folium</i> | isorhamnetin          | PTGS2           |
| <i>Microctis Folium</i> | isorhamnetin          | PTPN1           |
| <i>Microctis Folium</i> | isorhamnetin          | ESR2            |
| <i>Microctis Folium</i> | isorhamnetin          | DPP4            |
| <i>Microctis Folium</i> | isorhamnetin          | MAPK14          |
| <i>Microctis Folium</i> | isorhamnetin          | GSK3B           |
| <i>Microctis Folium</i> | isorhamnetin          | HSP90AA1        |
| <i>Microctis Folium</i> | isorhamnetin          | CDK2            |
| <i>Microctis Folium</i> | isorhamnetin          | PIK3CG          |
| <i>Microctis Folium</i> | isorhamnetin          | PKIA            |
| <i>Microctis Folium</i> | isorhamnetin          | PRSS1           |
| <i>Microctis Folium</i> | isorhamnetin          | PIM1            |
| <i>Microctis Folium</i> | isorhamnetin          | CCNA2           |
| <i>Microctis Folium</i> | isorhamnetin          | NCOA2           |
| <i>Microctis Folium</i> | isorhamnetin          | CALM2           |
| <i>Microctis Folium</i> | isorhamnetin          | PYGM            |
| <i>Microctis Folium</i> | isorhamnetin          | PPARD           |
| <i>Microctis Folium</i> | isorhamnetin          | CHEK1           |
| <i>Microctis Folium</i> | isorhamnetin          | AKR1B1          |
| <i>Microctis Folium</i> | isorhamnetin          | NCOA1           |
| <i>Microctis Folium</i> | isorhamnetin          | F7              |
| <i>Microctis Folium</i> | isorhamnetin          | F2              |
| <i>Microctis Folium</i> | isorhamnetin          | NOS3            |
| <i>Microctis Folium</i> | isorhamnetin          | ACHE            |
| <i>Microctis Folium</i> | isorhamnetin          | GABRA1          |
| <i>Microctis Folium</i> | isorhamnetin          | MAOB            |
| <i>Microctis Folium</i> | isorhamnetin          | GRIA2           |
| <i>Microctis Folium</i> | isorhamnetin          | RELA            |
| <i>Microctis Folium</i> | isorhamnetin          | XDH             |
| <i>Microctis Folium</i> | isorhamnetin          | NCF1            |
| <i>Microctis Folium</i> | isorhamnetin          | OLR1            |
| <i>Microctis Folium</i> | kaempferol            | NOS2            |
| <i>Microctis Folium</i> | kaempferol            | PTGS1           |
| <i>Microctis Folium</i> | kaempferol            | AR              |
| <i>Microctis Folium</i> | kaempferol            | PPARG           |
| <i>Microctis Folium</i> | kaempferol            | PTGS2           |
| <i>Microctis Folium</i> | kaempferol            | HSP90AA1        |
| <i>Microctis Folium</i> | kaempferol            | PIK3CG          |
| <i>Microctis Folium</i> | kaempferol            | PKIA            |
| <i>Microctis Folium</i> | kaempferol            | NCOA2           |
| <i>Microctis Folium</i> | kaempferol            | DPP4            |
| <i>Microctis Folium</i> | kaempferol            | PRSS1           |
| <i>Microctis Folium</i> | kaempferol            | PGR             |
| <i>Microctis Folium</i> | kaempferol            | F2              |
| <i>Microctis Folium</i> | kaempferol            | CHRM1           |
| <i>Microctis Folium</i> | kaempferol            | NOS3            |
| <i>Microctis Folium</i> | kaempferol            | GABRA2          |
| <i>Microctis Folium</i> | kaempferol            | ACHE            |
| <i>Microctis Folium</i> | kaempferol            | SLC6A2          |
| <i>Microctis Folium</i> | kaempferol            | CHRM2           |
| <i>Microctis Folium</i> | kaempferol            | ADRA1B          |
| <i>Microctis Folium</i> | kaempferol            | GABRA1          |

|                           |                       |          |
|---------------------------|-----------------------|----------|
| <i>Microctis Folium</i>   | kaempferol            | TOP2A    |
| <i>Microctis Folium</i>   | kaempferol            | F7       |
| <i>Microctis Folium</i>   | kaempferol            | CALM2    |
| <i>Microctis Folium</i>   | kaempferol            | RELA     |
| <i>Microctis Folium</i>   | kaempferol            | IKBKB    |
| <i>Microctis Folium</i>   | kaempferol            | AKT1     |
| <i>Microctis Folium</i>   | kaempferol            | BCL2     |
| <i>Microctis Folium</i>   | kaempferol            | BAX      |
| <i>Microctis Folium</i>   | kaempferol            | CD40LG   |
| <i>Microctis Folium</i>   | kaempferol            | JUN      |
| <i>Microctis Folium</i>   | kaempferol            | AHSA1    |
| <i>Microctis Folium</i>   | kaempferol            | CASP3    |
| <i>Microctis Folium</i>   | kaempferol            | MAPK8    |
| <i>Microctis Folium</i>   | kaempferol            | XDH      |
| <i>Microctis Folium</i>   | kaempferol            | MMP1     |
| <i>Microctis Folium</i>   | kaempferol            | STAT1    |
| <i>Microctis Folium</i>   | kaempferol            | CDK1     |
| <i>Microctis Folium</i>   | kaempferol            | PPARG    |
| <i>Microctis Folium</i>   | kaempferol            | HMOX1    |
| <i>Microctis Folium</i>   | kaempferol            | CYP3A4   |
| <i>Microctis Folium</i>   | kaempferol            | CYP1A1   |
| <i>Microctis Folium</i>   | kaempferol            | ICAM1    |
| <i>Microctis Folium</i>   | kaempferol            | SELE     |
| <i>Microctis Folium</i>   | kaempferol            | VCAM1    |
| <i>Microctis Folium</i>   | kaempferol            | NR1I2    |
| <i>Microctis Folium</i>   | kaempferol            | CYP1B1   |
| <i>Microctis Folium</i>   | kaempferol            | ALOX5    |
| <i>Microctis Folium</i>   | kaempferol            | HAS2     |
| <i>Microctis Folium</i>   | kaempferol            | AHR      |
| <i>Microctis Folium</i>   | kaempferol            | PSMD3    |
| <i>Microctis Folium</i>   | kaempferol            | SLC2A4   |
| <i>Microctis Folium</i>   | kaempferol            | NR1I3    |
| <i>Microctis Folium</i>   | kaempferol            | INSR     |
| <i>Microctis Folium</i>   | kaempferol            | DIO1     |
| <i>Microctis Folium</i>   | kaempferol            | GSTM1    |
| <i>Microctis Folium</i>   | kaempferol            | GSTM2    |
| <i>Microctis Folium</i>   | kaempferol            | AKR1C3   |
| <i>Microctis Folium</i>   | kaempferol            | SLPI     |
| <i>Microctis Folium</i>   | 4',5-Dihydroxyflavone | PTGS1    |
| <i>Microctis Folium</i>   | 4',5-Dihydroxyflavone | AR       |
| <i>Microctis Folium</i>   | 4',5-Dihydroxyflavone | PTGS2    |
| <i>Microctis Folium</i>   | 4',5-Dihydroxyflavone | DPP4     |
| <i>Microctis Folium</i>   | 4',5-Dihydroxyflavone | HSP90AA1 |
| <i>Microctis Folium</i>   | 4',5-Dihydroxyflavone | PIK3CG   |
| <i>Microctis Folium</i>   | 4',5-Dihydroxyflavone | MAOB     |
| <i>Microctis Folium</i>   | 4',5-Dihydroxyflavone | PKIA     |
| <i>Polygonum chinense</i> | kaempferol            | NOS2     |
| <i>Polygonum chinense</i> | kaempferol            | PTGS1    |
| <i>Polygonum chinense</i> | kaempferol            | AR       |
| <i>Polygonum chinense</i> | kaempferol            | PPARG    |
| <i>Polygonum chinense</i> | kaempferol            | PTGS2    |
| <i>Polygonum chinense</i> | kaempferol            | HSP90AA1 |
| <i>Polygonum chinense</i> | kaempferol            | PIK3CG   |
| <i>Polygonum chinense</i> | kaempferol            | PKIA     |
| <i>Polygonum chinense</i> | kaempferol            | NCOA2    |
| <i>Polygonum chinense</i> | kaempferol            | DPP4     |
| <i>Polygonum chinense</i> | kaempferol            | PRSS1    |
| <i>Polygonum chinense</i> | kaempferol            | PGR      |

|                           |            |         |
|---------------------------|------------|---------|
| <i>Polygonum chinense</i> | kaempferol | F2      |
| <i>Polygonum chinense</i> | kaempferol | CHRM1   |
| <i>Polygonum chinense</i> | kaempferol | NOS3    |
| <i>Polygonum chinense</i> | kaempferol | GABRA2  |
| <i>Polygonum chinense</i> | kaempferol | ACHE    |
| <i>Polygonum chinense</i> | kaempferol | SLC6A2  |
| <i>Polygonum chinense</i> | kaempferol | CHRM2   |
| <i>Polygonum chinense</i> | kaempferol | ADRA1B  |
| <i>Polygonum chinense</i> | kaempferol | GABRA1  |
| <i>Polygonum chinense</i> | kaempferol | TOP2A   |
| <i>Polygonum chinense</i> | kaempferol | F7      |
| <i>Polygonum chinense</i> | kaempferol | CALM2   |
| <i>Polygonum chinense</i> | kaempferol | RELA    |
| <i>Polygonum chinense</i> | kaempferol | IKBKB   |
| <i>Polygonum chinense</i> | kaempferol | AKT1    |
| <i>Polygonum chinense</i> | kaempferol | BCL2    |
| <i>Polygonum chinense</i> | kaempferol | BAX     |
| <i>Polygonum chinense</i> | kaempferol | CD40LG  |
| <i>Polygonum chinense</i> | kaempferol | JUN     |
| <i>Polygonum chinense</i> | kaempferol | AHSA1   |
| <i>Polygonum chinense</i> | kaempferol | CASP3   |
| <i>Polygonum chinense</i> | kaempferol | MAPK8   |
| <i>Polygonum chinense</i> | kaempferol | XDH     |
| <i>Polygonum chinense</i> | kaempferol | MMP1    |
| <i>Polygonum chinense</i> | kaempferol | STAT1   |
| <i>Polygonum chinense</i> | kaempferol | CDK1    |
| <i>Polygonum chinense</i> | kaempferol | PPARG   |
| <i>Polygonum chinense</i> | kaempferol | HMOX1   |
| <i>Polygonum chinense</i> | kaempferol | CYP3A4  |
| <i>Polygonum chinense</i> | kaempferol | CYP1A1  |
| <i>Polygonum chinense</i> | kaempferol | ICAM1   |
| <i>Polygonum chinense</i> | kaempferol | SELE    |
| <i>Polygonum chinense</i> | kaempferol | VCAM1   |
| <i>Polygonum chinense</i> | kaempferol | NR1I2   |
| <i>Polygonum chinense</i> | kaempferol | CYP1B1  |
| <i>Polygonum chinense</i> | kaempferol | ALOX5   |
| <i>Polygonum chinense</i> | kaempferol | HAS2    |
| <i>Polygonum chinense</i> | kaempferol | AHR     |
| <i>Polygonum chinense</i> | kaempferol | PSMD3   |
| <i>Polygonum chinense</i> | kaempferol | SLC2A4  |
| <i>Polygonum chinense</i> | kaempferol | NR1I3   |
| <i>Polygonum chinense</i> | kaempferol | INSR    |
| <i>Polygonum chinense</i> | kaempferol | DIO1    |
| <i>Polygonum chinense</i> | kaempferol | GSTM1   |
| <i>Polygonum chinense</i> | kaempferol | GSTM2   |
| <i>Polygonum chinense</i> | kaempferol | AKR1C3  |
| <i>Polygonum chinense</i> | kaempferol | SLPI    |
| <i>Polygonum chinense</i> | Quercetin  | NOX4    |
| <i>Polygonum chinense</i> | Quercetin  | AVPR2   |
| <i>Polygonum chinense</i> | Quercetin  | AKR1B1  |
| <i>Polygonum chinense</i> | Quercetin  | XDH     |
| <i>Polygonum chinense</i> | Quercetin  | MAOA    |
| <i>Polygonum chinense</i> | Quercetin  | IGF1R   |
| <i>Polygonum chinense</i> | Quercetin  | FLT3    |
| <i>Polygonum chinense</i> | Quercetin  | CYP19A1 |
| <i>Polygonum chinense</i> | Quercetin  | EGFR    |
| <i>Polygonum chinense</i> | Quercetin  | F2      |
| <i>Polygonum chinense</i> | Quercetin  | CA2     |

|                           |                          |         |
|---------------------------|--------------------------|---------|
| <i>Polygonum chinense</i> | Quercetin                | PIM1    |
| <i>Polygonum chinense</i> | Quercetin                | ALOX5   |
| <i>Polygonum chinense</i> | Quercetin                | AURKB   |
| <i>Polygonum chinense</i> | Quercetin                | DRD4    |
| <i>Polygonum chinense</i> | Quercetin                | ADORA1  |
| <i>Polygonum chinense</i> | Quercetin                | CA7     |
| <i>Polygonum chinense</i> | Quercetin                | GLO1    |
| <i>Polygonum chinense</i> | Quercetin                | MPO     |
| <i>Polygonum chinense</i> | Quercetin                | PIK3R1  |
| <i>Polygonum chinense</i> | Quercetin                | ADORA2A |
| <i>Polygonum chinense</i> | Quercetin                | DAPK1   |
| <i>Polygonum chinense</i> | Quercetin                | PYGL    |
| <i>Polygonum chinense</i> | Quercetin                | CA1     |
| <i>Polygonum chinense</i> | Quercetin                | GSK3B   |
| <i>Polygonum chinense</i> | Quercetin                | SRC     |
| <i>Polygonum chinense</i> | Quercetin                | PTK2    |
| <i>Polygonum chinense</i> | Quercetin                | HSD17B2 |
| <i>Polygonum chinense</i> | Quercetin                | KDR     |
| <i>Polygonum chinense</i> | Quercetin                | MMP13   |
| <i>Polygonum chinense</i> | 3-O-methylellagic acid   | CA7     |
| <i>Polygonum chinense</i> | 3-O-methylellagic acid   | CA12    |
| <i>Polygonum chinense</i> | 3-O-methylellagic acid   | CA13    |
| <i>Polygonum chinense</i> | 3-O-methylellagic acid   | CA9     |
| <i>Polygonum chinense</i> | 3-O-methylellagic acid   | GPR35   |
| <i>Polygonum chinense</i> | 3-O-methylellagic acid   | ERBB2   |
| <i>Polygonum chinense</i> | 3-O-methylellagic acid   | AKR1B1  |
| <i>Polygonum chinense</i> | 3-O-methylellagic acid   | CCND1   |
| <i>Polygonum chinense</i> | 3-O-methylellagic acid   | CDK4    |
| <i>Polygonum chinense</i> | 3-O-methylellagic acid   | PDGFRB  |
| <i>Polygonum chinense</i> | 3-O-methylellagic acid   | FLT4    |
| <i>Polygonum chinense</i> | 3-O-methylellagic acid   | IGF1R   |
| <i>Polygonum chinense</i> | 3-O-methylellagic acid   | INSR    |
| <i>Polygonum chinense</i> | 3-O-methylellagic acid   | EGFR    |
| <i>Polygonum chinense</i> | 3-O-methylellagic acid   | CA2     |
| <i>Polygonum chinense</i> | 3-O-methylellagic acid   | CDK2    |
| <i>Polygonum chinense</i> | 3-O-methylellagic acid   | CCNA1   |
| <i>Polygonum chinense</i> | 3-O-methylellagic acid   | CCNA2   |
| <i>Polygonum chinense</i> | 3-O-methylellagic acid   | AURKB   |
| <i>Polygonum chinense</i> | 3-O-methylellagic acid   | CA1     |
| <i>Polygonum chinense</i> | 3-O-methylellagic acid   | GSK3B   |
| <i>Polygonum chinense</i> | 3-O-methylellagic acid   | SRC     |
| <i>Polygonum chinense</i> | 3-O-methylellagic acid   | PTK2    |
| <i>Polygonum chinense</i> | 3-O-methylellagic acid   | KDR     |
| <i>Polygonum chinense</i> | 3-O-methylellagic acid   | PLK1    |
| <i>Polygonum chinense</i> | 3-O-methylellagic acid   | CA6     |
| <i>Polygonum chinense</i> | 3-O-methylellagic acid   | CA14    |
| <i>Polygonum chinense</i> | 3-O-methylellagic acid   | CSNK2A1 |
| <i>Polygonum chinense</i> | 3-O-methylellagic acid   | MET     |
| <i>Polygonum chinense</i> | 3-O-methylellagic acid   | CA4     |
| <i>Polygonum chinense</i> | 3-O-methylellagic acid   | PLK4    |
| <i>Polygonum chinense</i> | 3-O-methylellagic acid   | TEK     |
| <i>Polygonum chinense</i> | 3-O-methylellagic acid   | AKT1    |
| <i>Polygonum chinense</i> | kaempferol-7-O-glucoside | TNF     |
| <i>Polygonum chinense</i> | kaempferol-7-O-glucoside | AKR1B1  |
| <i>Polygonum chinense</i> | kaempferol-7-O-glucoside | IL2     |
| <i>Polygonum chinense</i> | kaempferol-7-O-glucoside | ADORA1  |
| <i>Polygonum chinense</i> | kaempferol-7-O-glucoside | CA7     |
| <i>Polygonum chinense</i> | kaempferol-7-O-glucoside | CA12    |

|                           |                              |         |
|---------------------------|------------------------------|---------|
| <i>Polygonum chinense</i> | kaempferol-7-O-glucoside     | XDH     |
| <i>Polygonum chinense</i> | kaempferol-7-O-glucoside     | RPS6KA3 |
| <i>Polygonum chinense</i> | kaempferol-7-O-glucoside     | CA2     |
| <i>Polygonum chinense</i> | kaempferol-7-O-glucoside     | CA4     |
| <i>Polygonum chinense</i> | kaempferol-7-O-glucoside     | CD38    |
| <i>Polygonum chinense</i> | kaempferol-7-O-glucoside     | PDE5A   |
| <i>Polygonum chinense</i> | kaempferol-7-O-glucoside     | NQO2    |
| <i>Polygonum chinense</i> | kaempferol-7-O-glucoside     | NOX4    |
| <i>Polygonum chinense</i> | kaempferol-7-O-glucoside     | ADRA2C  |
| <i>Polygonum chinense</i> | kaempferol-7-O-glucoside     | ALDH2   |
| <i>Polygonum chinense</i> | kaempferol-7-O-glucoside     | ACHE    |
| <i>Polygonum chinense</i> | kaempferol-7-O-glucoside     | ALOX5   |
| <i>Polygonum chinense</i> | kaempferol-7-O-glucoside     | PTGS2   |
| <i>Polygonum chinense</i> | kaempferol-7-O-glucoside     | EGFR    |
| <i>Polygonum chinense</i> | kaempferol-7-O-glucoside     | NMUR2   |
| <i>Polygonum chinense</i> | kaempferol-7-O-glucoside     | ADRA2A  |
| <i>Polygonum chinense</i> | kaempferol-7-O-glucoside     | CA1     |
| <i>Polygonum chinense</i> | kaempferol-7-O-glucoside     | SLC29A1 |
| <i>Polygonum chinense</i> | 3,3'-Di-O-Methylellagic Acid | CA7     |
| <i>Polygonum chinense</i> | 3,3'-Di-O-Methylellagic Acid | CA12    |
| <i>Polygonum chinense</i> | 3,3'-Di-O-Methylellagic Acid | CA13    |
| <i>Polygonum chinense</i> | 3,3'-Di-O-Methylellagic Acid | CA9     |
| <i>Polygonum chinense</i> | 3,3'-Di-O-Methylellagic Acid | GPR35   |
| <i>Polygonum chinense</i> | 3,3'-Di-O-Methylellagic Acid | CCND1   |
| <i>Polygonum chinense</i> | 3,3'-Di-O-Methylellagic Acid | CDK4    |
| <i>Polygonum chinense</i> | 3,3'-Di-O-Methylellagic Acid | PDGFRB  |
| <i>Polygonum chinense</i> | 3,3'-Di-O-Methylellagic Acid | FLT4    |
| <i>Polygonum chinense</i> | 3,3'-Di-O-Methylellagic Acid | IGF1R   |
| <i>Polygonum chinense</i> | 3,3'-Di-O-Methylellagic Acid | INSR    |
| <i>Polygonum chinense</i> | 3,3'-Di-O-Methylellagic Acid | CA2     |
| <i>Polygonum chinense</i> | 3,3'-Di-O-Methylellagic Acid | CDK2    |
| <i>Polygonum chinense</i> | 3,3'-Di-O-Methylellagic Acid | CCNA1   |
| <i>Polygonum chinense</i> | 3,3'-Di-O-Methylellagic Acid | CCNA2   |
| <i>Polygonum chinense</i> | 3,3'-Di-O-Methylellagic Acid | AURKB   |
| <i>Polygonum chinense</i> | 3,3'-Di-O-Methylellagic Acid | CA1     |
| <i>Polygonum chinense</i> | 3,3'-Di-O-Methylellagic Acid | SRC     |
| <i>Polygonum chinense</i> | 3,3'-Di-O-Methylellagic Acid | PTK2    |
| <i>Polygonum chinense</i> | 3,3'-Di-O-Methylellagic Acid | KDR     |
| <i>Polygonum chinense</i> | 3,3'-Di-O-Methylellagic Acid | PLK1    |
| <i>Polygonum chinense</i> | 3,3'-Di-O-Methylellagic Acid | CA6     |
| <i>Polygonum chinense</i> | 3,3'-Di-O-Methylellagic Acid | CA14    |
| <i>Polygonum chinense</i> | 3,3'-Di-O-Methylellagic Acid | MET     |
| <i>Polygonum chinense</i> | 3,3'-Di-O-Methylellagic Acid | CA4     |
| <i>Polygonum chinense</i> | 3,3'-Di-O-Methylellagic Acid | PLK4    |
| <i>Polygonum chinense</i> | 3,3'-Di-O-Methylellagic Acid | TEK     |
| <i>Polygonum chinense</i> | 3,3'-Di-O-Methylellagic Acid | AKT1    |
| <i>Polygonum chinense</i> | 3,3'-Di-O-Methylellagic Acid | AURKA   |
| <i>Polygonum chinense</i> | 3,3'-Di-O-Methylellagic Acid | CASA    |
| <i>Polygonum chinense</i> | 3,3'-Di-O-Methylellagic Acid | BACE1   |
| <i>Polygonum chinense</i> | 3,3'-Di-O-Methylellagic Acid | MAP3K8  |
| <i>Polygonum chinense</i> | 3,3'-Di-O-Methylellagic Acid | BRAF    |
| <i>Polygonum chinense</i> | Protocatechuic Acid          | CA2     |
| <i>Polygonum chinense</i> | Protocatechuic Acid          | CA7     |
| <i>Polygonum chinense</i> | Protocatechuic Acid          | CA1     |
| <i>Polygonum chinense</i> | Protocatechuic Acid          | CA6     |
| <i>Polygonum chinense</i> | Protocatechuic Acid          | CA12    |
| <i>Polygonum chinense</i> | Protocatechuic Acid          | CA14    |
| <i>Polygonum chinense</i> | Protocatechuic Acid          | CA9     |

|                           |                     |          |
|---------------------------|---------------------|----------|
| <i>Polygonum chinense</i> | Protocatechuic Acid | CA4      |
| <i>Polygonum chinense</i> | isorhamnetin        | NOS2     |
| <i>Polygonum chinense</i> | isorhamnetin        | PTGS1    |
| <i>Polygonum chinense</i> | isorhamnetin        | ESR1     |
| <i>Polygonum chinense</i> | isorhamnetin        | AR       |
| <i>Polygonum chinense</i> | isorhamnetin        | PPARG    |
| <i>Polygonum chinense</i> | isorhamnetin        | PTGS2    |
| <i>Polygonum chinense</i> | isorhamnetin        | PTPN1    |
| <i>Polygonum chinense</i> | isorhamnetin        | ESR2     |
| <i>Polygonum chinense</i> | isorhamnetin        | DPP4     |
| <i>Polygonum chinense</i> | isorhamnetin        | MAPK14   |
| <i>Polygonum chinense</i> | isorhamnetin        | GSK3B    |
| <i>Polygonum chinense</i> | isorhamnetin        | HSP90AA1 |
| <i>Polygonum chinense</i> | isorhamnetin        | CDK2     |
| <i>Polygonum chinense</i> | isorhamnetin        | PIK3CG   |
| <i>Polygonum chinense</i> | isorhamnetin        | PKIA     |
| <i>Polygonum chinense</i> | isorhamnetin        | PRSS1    |
| <i>Polygonum chinense</i> | isorhamnetin        | PIM1     |
| <i>Polygonum chinense</i> | isorhamnetin        | CCNA2    |
| <i>Polygonum chinense</i> | isorhamnetin        | NCOA2    |
| <i>Polygonum chinense</i> | isorhamnetin        | CALM2    |
| <i>Polygonum chinense</i> | isorhamnetin        | PYGM     |
| <i>Polygonum chinense</i> | isorhamnetin        | PPARD    |
| <i>Polygonum chinense</i> | isorhamnetin        | CHEK1    |
| <i>Polygonum chinense</i> | isorhamnetin        | AKR1B1   |
| <i>Polygonum chinense</i> | isorhamnetin        | NCOA1    |
| <i>Polygonum chinense</i> | isorhamnetin        | F7       |
| <i>Polygonum chinense</i> | isorhamnetin        | F2       |
| <i>Polygonum chinense</i> | isorhamnetin        | NOS3     |
| <i>Polygonum chinense</i> | isorhamnetin        | ACHE     |
| <i>Polygonum chinense</i> | isorhamnetin        | GABRA1   |
| <i>Polygonum chinense</i> | isorhamnetin        | MAOB     |
| <i>Polygonum chinense</i> | isorhamnetin        | GRIA2    |
| <i>Polygonum chinense</i> | isorhamnetin        | RELA     |
| <i>Polygonum chinense</i> | isorhamnetin        | XDH      |
| <i>Polygonum chinense</i> | isorhamnetin        | NCF1     |
| <i>Polygonum chinense</i> | isorhamnetin        | OLR1     |
| <i>Polygonum chinense</i> | luteolin            | PTGS1    |
| <i>Polygonum chinense</i> | luteolin            | AR       |
| <i>Polygonum chinense</i> | luteolin            | PTGS2    |
| <i>Polygonum chinense</i> | luteolin            | HSP90AA1 |
| <i>Polygonum chinense</i> | luteolin            | PRSS1    |
| <i>Polygonum chinense</i> | luteolin            | NCOA2    |
| <i>Polygonum chinense</i> | luteolin            | PKIA     |
| <i>Polygonum chinense</i> | luteolin            | DPP4     |
| <i>Polygonum chinense</i> | luteolin            | PIK3CG   |
| <i>Polygonum chinense</i> | luteolin            | RELA     |
| <i>Polygonum chinense</i> | luteolin            | EGFR     |
| <i>Polygonum chinense</i> | luteolin            | AKT1     |
| <i>Polygonum chinense</i> | luteolin            | CCND1    |
| <i>Polygonum chinense</i> | luteolin            | BCL2L1   |
| <i>Polygonum chinense</i> | luteolin            | CDKN1A   |
| <i>Polygonum chinense</i> | luteolin            | CASP9    |
| <i>Polygonum chinense</i> | luteolin            | MMP2     |
| <i>Polygonum chinense</i> | luteolin            | MMP9     |
| <i>Polygonum chinense</i> | luteolin            | MAPK1    |
| <i>Polygonum chinense</i> | luteolin            | IL10     |
| <i>Polygonum chinense</i> | luteolin            | RB1      |

|                           |          |          |
|---------------------------|----------|----------|
| <i>Polygonum chinense</i> | luteolin | CDK4     |
| <i>Polygonum chinense</i> | luteolin | CD40LG   |
| <i>Polygonum chinense</i> | luteolin | JUN      |
| <i>Polygonum chinense</i> | luteolin | IL6      |
| <i>Polygonum chinense</i> | luteolin | CASP3    |
| <i>Polygonum chinense</i> | luteolin | TP53     |
| <i>Polygonum chinense</i> | luteolin | NFKBIA   |
| <i>Polygonum chinense</i> | luteolin | XDH      |
| <i>Polygonum chinense</i> | luteolin | TOP1     |
| <i>Polygonum chinense</i> | luteolin | MDM2     |
| <i>Polygonum chinense</i> | luteolin | APP      |
| <i>Polygonum chinense</i> | luteolin | MMP1     |
| <i>Polygonum chinense</i> | luteolin | PCNA     |
| <i>Polygonum chinense</i> | luteolin | ERBB2    |
| <i>Polygonum chinense</i> | luteolin | PPARG    |
| <i>Polygonum chinense</i> | luteolin | HMOX1    |
| <i>Polygonum chinense</i> | luteolin | CASP7    |
| <i>Polygonum chinense</i> | luteolin | ICAM1    |
| <i>Polygonum chinense</i> | luteolin | MCL1     |
| <i>Polygonum chinense</i> | luteolin | BIRC5    |
| <i>Polygonum chinense</i> | luteolin | IL2      |
| <i>Polygonum chinense</i> | luteolin | CCNB1    |
| <i>Polygonum chinense</i> | luteolin | TYR      |
| <i>Polygonum chinense</i> | luteolin | IFNG     |
| <i>Polygonum chinense</i> | luteolin | IL4      |
| <i>Polygonum chinense</i> | luteolin | TOP2A    |
| <i>Polygonum chinense</i> | luteolin | XIAP     |
| <i>Polygonum chinense</i> | luteolin | SLC2A4   |
| <i>Polygonum chinense</i> | luteolin | INSR     |
| <i>Polygonum chinense</i> | luteolin | CD40LG   |
| <i>Polygonum chinense</i> | luteolin | PTGES    |
| <i>Polygonum chinense</i> | luteolin | NUF2     |
| <i>Polygonum chinense</i> | luteolin | ADCY2    |
| <i>Polygonum chinense</i> | luteolin | MET      |
| <i>Ecliptae Herba</i>     | acacetin | NOS2     |
| <i>Ecliptae Herba</i>     | acacetin | PTGS1    |
| <i>Ecliptae Herba</i>     | acacetin | AR       |
| <i>Ecliptae Herba</i>     | acacetin | PTGS2    |
| <i>Ecliptae Herba</i>     | acacetin | DPP4     |
| <i>Ecliptae Herba</i>     | acacetin | HSP90AA1 |
| <i>Ecliptae Herba</i>     | acacetin | CDK2     |
| <i>Ecliptae Herba</i>     | acacetin | PKIA     |
| <i>Ecliptae Herba</i>     | acacetin | PRSS1    |
| <i>Ecliptae Herba</i>     | acacetin | NCOA2    |
| <i>Ecliptae Herba</i>     | acacetin | NCOA1    |
| <i>Ecliptae Herba</i>     | acacetin | CALM2    |
| <i>Ecliptae Herba</i>     | acacetin | PIK3CG   |
| <i>Ecliptae Herba</i>     | acacetin | CHEK1    |
| <i>Ecliptae Herba</i>     | acacetin | ADRB2    |
| <i>Ecliptae Herba</i>     | acacetin | PDE3A    |
| <i>Ecliptae Herba</i>     | acacetin | RELA     |
| <i>Ecliptae Herba</i>     | acacetin | BCL2     |
| <i>Ecliptae Herba</i>     | acacetin | CDKN1A   |
| <i>Ecliptae Herba</i>     | acacetin | BAX      |
| <i>Ecliptae Herba</i>     | acacetin | CASP3    |
| <i>Ecliptae Herba</i>     | acacetin | TP53     |
| <i>Ecliptae Herba</i>     | acacetin | CASP8    |
| <i>Ecliptae Herba</i>     | acacetin | FASN     |

|                       |                                           |          |
|-----------------------|-------------------------------------------|----------|
| <i>Ecliptae Herba</i> | acacetin                                  | FASLG    |
| <i>Ecliptae Herba</i> | acacetin                                  | CYP19A1  |
| <i>Ecliptae Herba</i> | butin                                     | PTGS1    |
| <i>Ecliptae Herba</i> | butin                                     | PTGS2    |
| <i>Ecliptae Herba</i> | butin                                     | RXRA     |
| <i>Ecliptae Herba</i> | butin                                     | HSP90AA1 |
| <i>Ecliptae Herba</i> | butin                                     | PIK3CG   |
| <i>Ecliptae Herba</i> | butin                                     | LACTBL1  |
| <i>Ecliptae Herba</i> | butin                                     | PKIA     |
| <i>Ecliptae Herba</i> | 1,3,8,9-tetrahydroxybenzofurano[3,2-c]chr | HSP90AA1 |
| <i>Ecliptae Herba</i> | 3'-O-Methylorobol                         | NOS2     |
| <i>Ecliptae Herba</i> | 3'-O-Methylorobol                         | PTGS1    |
| <i>Ecliptae Herba</i> | 3'-O-Methylorobol                         | ESR1     |
| <i>Ecliptae Herba</i> | 3'-O-Methylorobol                         | AR       |
| <i>Ecliptae Herba</i> | 3'-O-Methylorobol                         | PPARG    |
| <i>Ecliptae Herba</i> | 3'-O-Methylorobol                         | PTGS2    |
| <i>Ecliptae Herba</i> | 3'-O-Methylorobol                         | ESR2     |
| <i>Ecliptae Herba</i> | 3'-O-Methylorobol                         | MAPK14   |
| <i>Ecliptae Herba</i> | 3'-O-Methylorobol                         | GSK3B    |
| <i>Ecliptae Herba</i> | 3'-O-Methylorobol                         | HSP90AA1 |
| <i>Ecliptae Herba</i> | 3'-O-Methylorobol                         | CDK2     |
| <i>Ecliptae Herba</i> | 3'-O-Methylorobol                         | CHEK1    |
| <i>Ecliptae Herba</i> | 3'-O-Methylorobol                         | PKIA     |
| <i>Ecliptae Herba</i> | 3'-O-Methylorobol                         | PRSS1    |
| <i>Ecliptae Herba</i> | 3'-O-Methylorobol                         | PIM1     |
| <i>Ecliptae Herba</i> | 3'-O-Methylorobol                         | CCNA2    |
| <i>Ecliptae Herba</i> | 3'-O-Methylorobol                         | NCOA1    |
| <i>Ecliptae Herba</i> | 3'-O-Methylorobol                         | CALM2    |
| <i>Ecliptae Herba</i> | Pratensein                                | NOS2     |
| <i>Ecliptae Herba</i> | Pratensein                                | PTGS1    |
| <i>Ecliptae Herba</i> | Pratensein                                | ESR1     |
| <i>Ecliptae Herba</i> | Pratensein                                | AR       |
| <i>Ecliptae Herba</i> | Pratensein                                | PPARG    |
| <i>Ecliptae Herba</i> | Pratensein                                | PTGS2    |
| <i>Ecliptae Herba</i> | Pratensein                                | ESR2     |
| <i>Ecliptae Herba</i> | Pratensein                                | DPP4     |
| <i>Ecliptae Herba</i> | Pratensein                                | MAPK14   |
| <i>Ecliptae Herba</i> | Pratensein                                | GSK3B    |
| <i>Ecliptae Herba</i> | Pratensein                                | HSP90AA1 |
| <i>Ecliptae Herba</i> | Pratensein                                | CDK2     |
| <i>Ecliptae Herba</i> | Pratensein                                | CHEK1    |
| <i>Ecliptae Herba</i> | Pratensein                                | PKIA     |
| <i>Ecliptae Herba</i> | Pratensein                                | PRSS1    |
| <i>Ecliptae Herba</i> | Pratensein                                | PIM1     |
| <i>Ecliptae Herba</i> | Pratensein                                | CCNA2    |
| <i>Ecliptae Herba</i> | Pratensein                                | NCOA2    |
| <i>Ecliptae Herba</i> | Pratensein                                | CALM2    |
| <i>Ecliptae Herba</i> | demethylwedelolactone                     | PTGS2    |
| <i>Ecliptae Herba</i> | demethylwedelolactone                     | GSK3B    |
| <i>Ecliptae Herba</i> | wedelolactone                             | ESR1     |
| <i>Ecliptae Herba</i> | wedelolactone                             | PPARG    |
| <i>Ecliptae Herba</i> | wedelolactone                             | ESR2     |
| <i>Ecliptae Herba</i> | wedelolactone                             | GSK3B    |
| <i>Ecliptae Herba</i> | wedelolactone                             | HSP90AA1 |
| <i>Ecliptae Herba</i> | wedelolactone                             | CDK2     |
| <i>Ecliptae Herba</i> | wedelolactone                             | IKBKB    |
| <i>Ecliptae Herba</i> | wedelolactone                             | AR       |
| <i>Ecliptae Herba</i> | luteolin                                  | PTGS1    |



|                           |          |          |
|---------------------------|----------|----------|
| <i>Ecliptae Herba</i>     | luteolin | AR       |
| <i>Ecliptae Herba</i>     | luteolin | PTGS2    |
| <i>Ecliptae Herba</i>     | luteolin | HSP90AA1 |
| <i>Ecliptae Herba</i>     | luteolin | PRSS1    |
| <i>Ecliptae Herba</i>     | luteolin | NCOA2    |
| <i>Ecliptae Herba</i>     | luteolin | PKIA     |
| <i>Ecliptae Herba</i>     | luteolin | DPP4     |
| <i>Ecliptae Herba</i>     | luteolin | PIK3CG   |
| <i>Ecliptae Herba</i>     | luteolin | RELA     |
| <i>Ecliptae Herba</i>     | luteolin | EGFR     |
| <i>Ecliptae Herba</i>     | luteolin | AKT1     |
| <i>Ecliptae Herba</i>     | luteolin | CCND1    |
| <i>Ecliptae Herba</i>     | luteolin | BCL2L1   |
| <i>Ecliptae Herba</i>     | luteolin | CDKN1A   |
| <i>Ecliptae Herba</i>     | luteolin | CASP9    |
| <i>Ecliptae Herba</i>     | luteolin | MMP2     |
| <i>Ecliptae Herba</i>     | luteolin | MMP9     |
| <i>Ecliptae Herba</i>     | luteolin | MAPK1    |
| <i>Ecliptae Herba</i>     | luteolin | IL10     |
| <i>Ecliptae Herba</i>     | luteolin | RB1      |
| <i>Ecliptae Herba</i>     | luteolin | CDK4     |
| <i>Ecliptae Herba</i>     | luteolin | CD40LG   |
| <i>Ecliptae Herba</i>     | luteolin | JUN      |
| <i>Ecliptae Herba</i>     | luteolin | IL6      |
| <i>Ecliptae Herba</i>     | luteolin | CASP3    |
| <i>Ecliptae Herba</i>     | luteolin | TP53     |
| <i>Ecliptae Herba</i>     | luteolin | NFKBIA   |
| <i>Ecliptae Herba</i>     | luteolin | XDH      |
| <i>Ecliptae Herba</i>     | luteolin | TOP1     |
| <i>Ecliptae Herba</i>     | luteolin | MDM2     |
| <i>Ecliptae Herba</i>     | luteolin | APP      |
| <i>Ecliptae Herba</i>     | luteolin | MMP1     |
| <i>Ecliptae Herba</i>     | luteolin | PCNA     |
| <i>Ecliptae Herba</i>     | luteolin | ERBB2    |
| <i>Ecliptae Herba</i>     | luteolin | PPARG    |
| <i>Ecliptae Herba</i>     | luteolin | HMOX1    |
| <i>Ecliptae Herba</i>     | luteolin | CASP7    |
| <i>Ecliptae Herba</i>     | luteolin | ICAM1    |
| <i>Ecliptae Herba</i>     | luteolin | MCL1     |
| <i>Ecliptae Herba</i>     | luteolin | BIRC5    |
| <i>Ecliptae Herba</i>     | luteolin | IL2      |
| <i>Ecliptae Herba</i>     | luteolin | CCNB1    |
| <i>Ecliptae Herba</i>     | luteolin | TYR      |
| <i>Ecliptae Herba</i>     | luteolin | IFNG     |
| <i>Ecliptae Herba</i>     | luteolin | IL4      |
| <i>Ecliptae Herba</i>     | luteolin | TOP2A    |
| <i>Ecliptae Herba</i>     | luteolin | XIAP     |
| <i>Ecliptae Herba</i>     | luteolin | SLC2A4   |
| <i>Ecliptae Herba</i>     | luteolin | INSR     |
| <i>Ecliptae Herba</i>     | luteolin | CD40LG   |
| <i>Ecliptae Herba</i>     | luteolin | PTGES    |
| <i>Ecliptae Herba</i>     | luteolin | NUF2     |
| <i>Ecliptae Herba</i>     | luteolin | ADCY2    |
| <i>Ecliptae Herba</i>     | luteolin | MET      |
| <i>Perilla Frutescens</i> | luteolin | PTGS1    |
| <i>Perilla Frutescens</i> | luteolin | AR       |
| <i>Perilla Frutescens</i> | luteolin | PTGS2    |
| <i>Perilla Frutescens</i> | luteolin | HSP90AA1 |

|                           |          |          |
|---------------------------|----------|----------|
| <i>Perilla Frutescens</i> | luteolin | PRSS1    |
| <i>Perilla Frutescens</i> | luteolin | NCOA2    |
| <i>Perilla Frutescens</i> | luteolin | PKIA     |
| <i>Perilla Frutescens</i> | luteolin | DPP4     |
| <i>Perilla Frutescens</i> | luteolin | PIK3CG   |
| <i>Perilla Frutescens</i> | luteolin | RELA     |
| <i>Perilla Frutescens</i> | luteolin | EGFR     |
| <i>Perilla Frutescens</i> | luteolin | AKT1     |
| <i>Perilla Frutescens</i> | luteolin | CCND1    |
| <i>Perilla Frutescens</i> | luteolin | BCL2L1   |
| <i>Perilla Frutescens</i> | luteolin | CDKN1A   |
| <i>Perilla Frutescens</i> | luteolin | CASP9    |
| <i>Perilla Frutescens</i> | luteolin | MMP2     |
| <i>Perilla Frutescens</i> | luteolin | MMP9     |
| <i>Perilla Frutescens</i> | luteolin | MAPK1    |
| <i>Perilla Frutescens</i> | luteolin | IL10     |
| <i>Perilla Frutescens</i> | luteolin | RB1      |
| <i>Perilla Frutescens</i> | luteolin | CDK4     |
| <i>Perilla Frutescens</i> | luteolin | CD40LG   |
| <i>Perilla Frutescens</i> | luteolin | JUN      |
| <i>Perilla Frutescens</i> | luteolin | IL6      |
| <i>Perilla Frutescens</i> | luteolin | CASP3    |
| <i>Perilla Frutescens</i> | luteolin | TP53     |
| <i>Perilla Frutescens</i> | luteolin | NFKBIA   |
| <i>Perilla Frutescens</i> | luteolin | XDH      |
| <i>Perilla Frutescens</i> | luteolin | TOP1     |
| <i>Perilla Frutescens</i> | luteolin | MDM2     |
| <i>Perilla Frutescens</i> | luteolin | APP      |
| <i>Perilla Frutescens</i> | luteolin | MMP1     |
| <i>Perilla Frutescens</i> | luteolin | PCNA     |
| <i>Perilla Frutescens</i> | luteolin | ERBB2    |
| <i>Perilla Frutescens</i> | luteolin | PPARG    |
| <i>Perilla Frutescens</i> | luteolin | HMOX1    |
| <i>Perilla Frutescens</i> | luteolin | CASP7    |
| <i>Perilla Frutescens</i> | luteolin | ICAM1    |
| <i>Perilla Frutescens</i> | luteolin | MCL1     |
| <i>Perilla Frutescens</i> | luteolin | BIRC5    |
| <i>Perilla Frutescens</i> | luteolin | IL2      |
| <i>Perilla Frutescens</i> | luteolin | CCNB1    |
| <i>Perilla Frutescens</i> | luteolin | TYR      |
| <i>Perilla Frutescens</i> | luteolin | IFNG     |
| <i>Perilla Frutescens</i> | luteolin | IL4      |
| <i>Perilla Frutescens</i> | luteolin | TOP2A    |
| <i>Perilla Frutescens</i> | luteolin | XIAP     |
| <i>Perilla Frutescens</i> | luteolin | SLC2A4   |
| <i>Perilla Frutescens</i> | luteolin | INSR     |
| <i>Perilla Frutescens</i> | luteolin | CD40LG   |
| <i>Perilla Frutescens</i> | luteolin | PTGES    |
| <i>Perilla Frutescens</i> | luteolin | NUF2     |
| <i>Perilla Frutescens</i> | luteolin | ADCY2    |
| <i>Perilla Frutescens</i> | luteolin | MET      |
| <i>Isatidis Radix</i>     | acacetin | NOS2     |
| <i>Isatidis Radix</i>     | acacetin | PTGS1    |
| <i>Isatidis Radix</i>     | acacetin | AR       |
| <i>Isatidis Radix</i>     | acacetin | PTGS2    |
| <i>Isatidis Radix</i>     | acacetin | DPP4     |
| <i>Isatidis Radix</i>     | acacetin | HSP90AA1 |
| <i>Isatidis Radix</i>     | acacetin | CDK2     |

|                       |                  |          |
|-----------------------|------------------|----------|
| <i>Isatidis Radix</i> | acacetin         | PKIA     |
| <i>Isatidis Radix</i> | acacetin         | PRSS1    |
| <i>Isatidis Radix</i> | acacetin         | NCOA2    |
| <i>Isatidis Radix</i> | acacetin         | NCOA1    |
| <i>Isatidis Radix</i> | acacetin         | CALM2    |
| <i>Isatidis Radix</i> | acacetin         | PIK3CG   |
| <i>Isatidis Radix</i> | acacetin         | CHEK1    |
| <i>Isatidis Radix</i> | acacetin         | ADRB2    |
| <i>Isatidis Radix</i> | acacetin         | PDE3A    |
| <i>Isatidis Radix</i> | acacetin         | RELA     |
| <i>Isatidis Radix</i> | acacetin         | BCL2     |
| <i>Isatidis Radix</i> | acacetin         | CDKN1A   |
| <i>Isatidis Radix</i> | acacetin         | BAX      |
| <i>Isatidis Radix</i> | acacetin         | CASP3    |
| <i>Isatidis Radix</i> | acacetin         | TP53     |
| <i>Isatidis Radix</i> | acacetin         | CASP8    |
| <i>Isatidis Radix</i> | acacetin         | FASN     |
| <i>Isatidis Radix</i> | acacetin         | FASLG    |
| <i>Isatidis Radix</i> | acacetin         | CYP19A1  |
| <i>Isatidis Radix</i> | EUPATORIN        | NOS2     |
| <i>Isatidis Radix</i> | EUPATORIN        | PTGS1    |
| <i>Isatidis Radix</i> | EUPATORIN        | F2       |
| <i>Isatidis Radix</i> | EUPATORIN        | SCN5A    |
| <i>Isatidis Radix</i> | EUPATORIN        | F10      |
| <i>Isatidis Radix</i> | EUPATORIN        | PTGS2    |
| <i>Isatidis Radix</i> | EUPATORIN        | F7       |
| <i>Isatidis Radix</i> | EUPATORIN        | TOP2A    |
| <i>Isatidis Radix</i> | EUPATORIN        | DPP4     |
| <i>Isatidis Radix</i> | EUPATORIN        | HSP90AA1 |
| <i>Isatidis Radix</i> | EUPATORIN        | PRSS1    |
| <i>Isatidis Radix</i> | EUPATORIN        | NCOA2    |
| <i>Isatidis Radix</i> | EUPATORIN        | NCOA1    |
| <i>Isatidis Radix</i> | EUPATORIN        | CALM2    |
| <i>Isatidis Radix</i> | Dinatin          | NOS2     |
| <i>Isatidis Radix</i> | Dinatin          | PTGS1    |
| <i>Isatidis Radix</i> | Dinatin          | PTGS2    |
| <i>Isatidis Radix</i> | Dinatin          | DPP4     |
| <i>Isatidis Radix</i> | Dinatin          | HSP90AA1 |
| <i>Isatidis Radix</i> | Dinatin          | PIK3CG   |
| <i>Isatidis Radix</i> | Dinatin          | PKIA     |
| <i>Isatidis Radix</i> | Dinatin          | PRSS1    |
| <i>Isatidis Radix</i> | Dinatin          | NCOA2    |
| <i>Isatidis Radix</i> | Dinatin          | NCOA1    |
| <i>Isatidis Radix</i> | Dinatin          | CALM2    |
| <i>Isatidis Radix</i> | Dinatin          | F2       |
| <i>Isatidis Radix</i> | Dinatin          | NOS3     |
| <i>Isatidis Radix</i> | Dinatin          | ACHE     |
| <i>Isatidis Radix</i> | Dinatin          | RHO      |
| <i>Isatidis Radix</i> | quindoline       | PTGS1    |
| <i>Isatidis Radix</i> | quindoline       | PTGS2    |
| <i>Isatidis Radix</i> | quindoline       | MAOB     |
| <i>Isatidis Radix</i> | quindoline       | PKIA     |
| <i>Isatidis Radix</i> | quindoline       | NCOA2    |
| <i>Isatidis Radix</i> | quindoline       | PKIA     |
| <i>Isatidis Radix</i> | hydroxyindirubin | NOS2     |
| <i>Isatidis Radix</i> | hydroxyindirubin | PTGS1    |
| <i>Isatidis Radix</i> | hydroxyindirubin | ESR1     |
| <i>Isatidis Radix</i> | hydroxyindirubin | AR       |

|                       |                                                                                             |          |
|-----------------------|---------------------------------------------------------------------------------------------|----------|
| <i>Isatidis Radix</i> | hydroxyindirubin                                                                            | PPARG    |
| <i>Isatidis Radix</i> | hydroxyindirubin                                                                            | PTGS2    |
| <i>Isatidis Radix</i> | hydroxyindirubin                                                                            | MAPK14   |
| <i>Isatidis Radix</i> | hydroxyindirubin                                                                            | GSK3B    |
| <i>Isatidis Radix</i> | hydroxyindirubin                                                                            | HSP90AA1 |
| <i>Isatidis Radix</i> | hydroxyindirubin                                                                            | CDK2     |
| <i>Isatidis Radix</i> | hydroxyindirubin                                                                            | PIK3CG   |
| <i>Isatidis Radix</i> | hydroxyindirubin                                                                            | PKIA     |
| <i>Isatidis Radix</i> | hydroxyindirubin                                                                            | PIM1     |
| <i>Isatidis Radix</i> | hydroxyindirubin                                                                            | CCNA2    |
| <i>Isatidis Radix</i> | Indigo                                                                                      | PTGS1    |
| <i>Isatidis Radix</i> | Indigo                                                                                      | PTGS2    |
| <i>Isatidis Radix</i> | Indigo                                                                                      | RXRA     |
| <i>Isatidis Radix</i> | Indigo                                                                                      | CDK2     |
| <i>Isatidis Radix</i> | Indigo                                                                                      | PKIA     |
| <i>Isatidis Radix</i> | Indigo                                                                                      | PIM1     |
| <i>Isatidis Radix</i> | Indigo                                                                                      | CCNA2    |
| <i>Isatidis Radix</i> | (2Z)-2-(2-oxoindolin-3-ylidene)indolin-3-ol                                                 | NOS2     |
| <i>Isatidis Radix</i> | (2Z)-2-(2-oxoindolin-3-ylidene)indolin-3-ol                                                 | PTGS1    |
| <i>Isatidis Radix</i> | (2Z)-2-(2-oxoindolin-3-ylidene)indolin-3-ol                                                 | ESR1     |
| <i>Isatidis Radix</i> | (2Z)-2-(2-oxoindolin-3-ylidene)indolin-3-ol                                                 | AR       |
| <i>Isatidis Radix</i> | (2Z)-2-(2-oxoindolin-3-ylidene)indolin-3-ol                                                 | PTGS2    |
| <i>Isatidis Radix</i> | (2Z)-2-(2-oxoindolin-3-ylidene)indolin-3-ol                                                 | RXRA     |
| <i>Isatidis Radix</i> | (2Z)-2-(2-oxoindolin-3-ylidene)indolin-3-ol                                                 | GABRA1   |
| <i>Isatidis Radix</i> | (2Z)-2-(2-oxoindolin-3-ylidene)indolin-3-ol                                                 | MAPK14   |
| <i>Isatidis Radix</i> | (2Z)-2-(2-oxoindolin-3-ylidene)indolin-3-ol                                                 | GSK3B    |
| <i>Isatidis Radix</i> | (2Z)-2-(2-oxoindolin-3-ylidene)indolin-3-ol                                                 | HSP90AA1 |
| <i>Isatidis Radix</i> | (2Z)-2-(2-oxoindolin-3-ylidene)indolin-3-ol                                                 | CDK2     |
| <i>Isatidis Radix</i> | (2Z)-2-(2-oxoindolin-3-ylidene)indolin-3-ol                                                 | CHEK1    |
| <i>Isatidis Radix</i> | (2Z)-2-(2-oxoindolin-3-ylidene)indolin-3-ol                                                 | PKIA     |
| <i>Isatidis Radix</i> | (2Z)-2-(2-oxoindolin-3-ylidene)indolin-3-ol                                                 | PIM1     |
| <i>Isatidis Radix</i> | (2Z)-2-(2-oxoindolin-3-ylidene)indolin-3-ol                                                 | CCNA2    |
| <i>Isatidis Radix</i> | 2-(9-((3-methyl-2-oxopent-3-en-1-yl)oxy)-2H-furo[3,2-c]pyridin-5-yl)-2H-furo[3,2-c]pyridine | KCNH2    |
| <i>Isatidis Radix</i> | 2-(9-((3-methyl-2-oxopent-3-en-1-yl)oxy)-2H-furo[3,2-c]pyridin-5-yl)-2H-furo[3,2-c]pyridine | F10      |
| <i>Isatidis Radix</i> | 2-(9-((3-methyl-2-oxopent-3-en-1-yl)oxy)-2H-furo[3,2-c]pyridin-5-yl)-2H-furo[3,2-c]pyridine | PTGS2    |
| <i>Isatidis Radix</i> | 2-(9-((3-methyl-2-oxopent-3-en-1-yl)oxy)-2H-furo[3,2-c]pyridin-5-yl)-2H-furo[3,2-c]pyridine | TOP2A    |
| <i>Isatidis Radix</i> | 2-(9-((3-methyl-2-oxopent-3-en-1-yl)oxy)-2H-furo[3,2-c]pyridin-5-yl)-2H-furo[3,2-c]pyridine | HSP90AA1 |
| <i>Isatidis Radix</i> | 2-(9-((3-methyl-2-oxopent-3-en-1-yl)oxy)-2H-furo[3,2-c]pyridin-5-yl)-2H-furo[3,2-c]pyridine | PRSS1    |
| <i>Isatidis Radix</i> | 2-(9-((3-methyl-2-oxopent-3-en-1-yl)oxy)-2H-furo[3,2-c]pyridin-5-yl)-2H-furo[3,2-c]pyridine | NCOA2    |
| <i>Isatidis Radix</i> | 2-(9-((3-methyl-2-oxopent-3-en-1-yl)oxy)-2H-furo[3,2-c]pyridin-5-yl)-2H-furo[3,2-c]pyridine | KCNMA1   |
| <i>Isatidis Radix</i> | DFV                                                                                         | PTGS1    |
| <i>Isatidis Radix</i> | DFV                                                                                         | ESR1     |
| <i>Isatidis Radix</i> | DFV                                                                                         | PTGS2    |
| <i>Isatidis Radix</i> | DFV                                                                                         | RXRA     |
| <i>Isatidis Radix</i> | DFV                                                                                         | ADRB2    |
| <i>Isatidis Radix</i> | DFV                                                                                         | HSP90AA1 |
| <i>Isatidis Radix</i> | DFV                                                                                         | PIK3CG   |
| <i>Isatidis Radix</i> | DFV                                                                                         | PKIA     |
| <i>Isatidis Radix</i> | DFV                                                                                         | LACTBL1  |
| <i>Isatidis Radix</i> | DFV                                                                                         | MAOB     |
| <i>Isatidis Radix</i> | DFV                                                                                         | SLC6A4   |
| <i>Isatidis Radix</i> | DFV                                                                                         | PKIA     |
| <i>Isatidis Radix</i> | (E)-2-[(3-indole)cyanomethylene]-3-indolylamine                                             | NOS2     |
| <i>Isatidis Radix</i> | (E)-2-[(3-indole)cyanomethylene]-3-indolylamine                                             | PTGS1    |
| <i>Isatidis Radix</i> | (E)-2-[(3-indole)cyanomethylene]-3-indolylamine                                             | ESR1     |
| <i>Isatidis Radix</i> | (E)-2-[(3-indole)cyanomethylene]-3-indolylamine                                             | AR       |
| <i>Isatidis Radix</i> | (E)-2-[(3-indole)cyanomethylene]-3-indolylamine                                             | PTGS2    |
| <i>Isatidis Radix</i> | (E)-2-[(3-indole)cyanomethylene]-3-indolylamine                                             | RXRA     |

|                       |                                            |          |
|-----------------------|--------------------------------------------|----------|
| <i>Isatidis Radix</i> | (E)-2-[(3-indole)cyanomethylene-]-3-indoli | MAPK14   |
| <i>Isatidis Radix</i> | (E)-2-[(3-indole)cyanomethylene-]-3-indoli | GSK3B    |
| <i>Isatidis Radix</i> | (E)-2-[(3-indole)cyanomethylene-]-3-indoli | HSP90AA1 |
| <i>Isatidis Radix</i> | (E)-2-[(3-indole)cyanomethylene-]-3-indoli | CDK2     |
| <i>Isatidis Radix</i> | (E)-2-[(3-indole)cyanomethylene-]-3-indoli | PIK3CG   |
| <i>Isatidis Radix</i> | (E)-2-[(3-indole)cyanomethylene-]-3-indoli | CHEK1    |
| <i>Isatidis Radix</i> | (E)-2-[(3-indole)cyanomethylene-]-3-indoli | PKIA     |
| <i>Isatidis Radix</i> | (E)-2-[(3-indole)cyanomethylene-]-3-indoli | PIM1     |
| <i>Isatidis Radix</i> | (E)-2-[(3-indole)cyanomethylene-]-3-indoli | CCNA2    |
| <i>Isatidis Radix</i> | neohesperidin qt                           | PTGS1    |
| <i>Isatidis Radix</i> | neohesperidin qt                           | SCN5A    |
| <i>Isatidis Radix</i> | neohesperidin qt                           | PTGS2    |
| <i>Isatidis Radix</i> | neohesperidin qt                           | HSP90AA1 |
| <i>Isatidis Radix</i> | neohesperidin qt                           | PIK3CG   |
| <i>Isatidis Radix</i> | neohesperidin qt                           | PKIA     |
| <i>Isatidis Radix</i> | neohesperidin qt                           | CALM2    |
| <i>Isatidis Radix</i> | Sinensetin                                 | NOS2     |
| <i>Isatidis Radix</i> | Sinensetin                                 | F2       |
| <i>Isatidis Radix</i> | Sinensetin                                 | KCNH2    |
| <i>Isatidis Radix</i> | Sinensetin                                 | AR       |
| <i>Isatidis Radix</i> | Sinensetin                                 | SCN5A    |
| <i>Isatidis Radix</i> | Sinensetin                                 | F10      |
| <i>Isatidis Radix</i> | Sinensetin                                 | PTGS2    |
| <i>Isatidis Radix</i> | Sinensetin                                 | F7       |
| <i>Isatidis Radix</i> | Sinensetin                                 | ACHE     |
| <i>Isatidis Radix</i> | Sinensetin                                 | ADRB2    |
| <i>Isatidis Radix</i> | Sinensetin                                 | TOP2A    |
| <i>Isatidis Radix</i> | Sinensetin                                 | ESR2     |
| <i>Isatidis Radix</i> | Sinensetin                                 | DPP4     |
| <i>Isatidis Radix</i> | Sinensetin                                 | HSP90AA1 |
| <i>Isatidis Radix</i> | Sinensetin                                 | CHEK1    |
| <i>Isatidis Radix</i> | Sinensetin                                 | PRSS1    |
| <i>Isatidis Radix</i> | Sinensetin                                 | NCOA2    |
| <i>Isatidis Radix</i> | Sinensetin                                 | NCOA1    |
| <i>Isatidis Radix</i> | Sinensetin                                 | CALM2    |
| <i>Isatidis Radix</i> | Sinensetin                                 | PTGS1    |
| <i>Isatidis Radix</i> | Sinensetin                                 | ADRA1B   |
| <i>Isatidis Radix</i> | 6-(3-oxoindolin-2-ylidene)indolo[2,1-b]qui | PTGS1    |
| <i>Isatidis Radix</i> | 6-(3-oxoindolin-2-ylidene)indolo[2,1-b]qui | ESR1     |
| <i>Isatidis Radix</i> | 6-(3-oxoindolin-2-ylidene)indolo[2,1-b]qui | PTGS2    |
| <i>Isatidis Radix</i> | 6-(3-oxoindolin-2-ylidene)indolo[2,1-b]qui | KDR      |
| <i>Isatidis Radix</i> | 6-(3-oxoindolin-2-ylidene)indolo[2,1-b]qui | PRSS1    |
| <i>Isatidis Radix</i> | (E)-3-(3,5-dimethoxy-4-hydroxy-benzyliden  | PTGS1    |
| <i>Isatidis Radix</i> | (E)-3-(3,5-dimethoxy-4-hydroxy-benzyliden  | SCN5A    |
| <i>Isatidis Radix</i> | (E)-3-(3,5-dimethoxy-4-hydroxy-benzyliden  | PTGS2    |
| <i>Isatidis Radix</i> | (E)-3-(3,5-dimethoxy-4-hydroxy-benzyliden  | RXRA     |
| <i>Isatidis Radix</i> | (E)-3-(3,5-dimethoxy-4-hydroxy-benzyliden  | PDE3A    |
| <i>Isatidis Radix</i> | (E)-3-(3,5-dimethoxy-4-hydroxy-benzyliden  | GABRA1   |
| <i>Isatidis Radix</i> | (E)-3-(3,5-dimethoxy-4-hydroxy-benzyliden  | HSP90AA1 |
| <i>Isatidis Radix</i> | (E)-3-(3,5-dimethoxy-4-hydroxy-benzyliden  | PIK3CG   |
| <i>Isatidis Radix</i> | (E)-3-(3,5-dimethoxy-4-hydroxy-benzyliden  | PKIA     |
| <i>Isatidis Radix</i> | (E)-3-(3,5-dimethoxy-4-hydroxyb-enzyliden  | PTGS1    |
| <i>Isatidis Radix</i> | (E)-3-(3,5-dimethoxy-4-hydroxyb-enzyliden  | CHRM1    |
| <i>Isatidis Radix</i> | (E)-3-(3,5-dimethoxy-4-hydroxyb-enzyliden  | SCN5A    |
| <i>Isatidis Radix</i> | (E)-3-(3,5-dimethoxy-4-hydroxyb-enzyliden  | PTGS2    |
| <i>Isatidis Radix</i> | (E)-3-(3,5-dimethoxy-4-hydroxyb-enzyliden  | RXRA     |
| <i>Isatidis Radix</i> | (E)-3-(3,5-dimethoxy-4-hydroxyb-enzyliden  | PDE3A    |
| <i>Isatidis Radix</i> | (E)-3-(3,5-dimethoxy-4-hydroxyb-enzyliden  | PTPN1    |

|                          |                                            |          |
|--------------------------|--------------------------------------------|----------|
| <i>Isatidis Radix</i>    | (E)-3-(3,5-dimethoxy-4-hydroxybenzyliden   | ADRB2    |
| <i>Isatidis Radix</i>    | (E)-3-(3,5-dimethoxy-4-hydroxybenzyliden   | GABRA1   |
| <i>Isatidis Radix</i>    | (E)-3-(3,5-dimethoxy-4-hydroxybenzyliden   | HSP90AA1 |
| <i>Isatidis Radix</i>    | (E)-3-(3,5-dimethoxy-4-hydroxybenzyliden   | PIK3CG   |
| <i>Isatidis Radix</i>    | (E)-3-(3,5-dimethoxy-4-hydroxybenzyliden   | CHRNA7   |
| <i>Isatidis Radix</i>    | (E)-3-(3,5-dimethoxy-4-hydroxybenzyliden   | PKIA     |
| <i>Isatidis Radix</i>    | 3-[(3,5-dimethoxy-4-oxo-1-cyclohexa-2,5-d  | PTGS1    |
| <i>Isatidis Radix</i>    | 3-[(3,5-dimethoxy-4-oxo-1-cyclohexa-2,5-d  | KCNH2    |
| <i>Isatidis Radix</i>    | 3-[(3,5-dimethoxy-4-oxo-1-cyclohexa-2,5-d  | SCN5A    |
| <i>Isatidis Radix</i>    | 3-[(3,5-dimethoxy-4-oxo-1-cyclohexa-2,5-d  | F10      |
| <i>Isatidis Radix</i>    | 3-[(3,5-dimethoxy-4-oxo-1-cyclohexa-2,5-d  | PTGS2    |
| <i>Isatidis Radix</i>    | 3-[(3,5-dimethoxy-4-oxo-1-cyclohexa-2,5-d  | F7       |
| <i>Isatidis Radix</i>    | 3-[(3,5-dimethoxy-4-oxo-1-cyclohexa-2,5-d  | HSP90AA1 |
| <i>Isatidis Radix</i>    | 3-[(3,5-dimethoxy-4-oxo-1-cyclohexa-2,5-d  | PRSS1    |
| <i>Chrysanthemi Flos</i> | [(1S,5S,7S)-7-acetoxy-5-isopropenyl-2,8-di | NOS2     |
| <i>Chrysanthemi Flos</i> | [(1S,5S,7S)-7-acetoxy-5-isopropenyl-2,8-di | F2       |
| <i>Chrysanthemi Flos</i> | [(1S,5S,7S)-7-acetoxy-5-isopropenyl-2,8-di | AR       |
| <i>Chrysanthemi Flos</i> | [(1S,5S,7S)-7-acetoxy-5-isopropenyl-2,8-di | PTGS2    |
| <i>Chrysanthemi Flos</i> | [(1S,5S,7S)-7-acetoxy-5-isopropenyl-2,8-di | NOS3     |
| <i>Chrysanthemi Flos</i> | [(1S,5S,7S)-7-acetoxy-5-isopropenyl-2,8-di | CA2      |
| <i>Chrysanthemi Flos</i> | [(1S,5S,7S)-7-acetoxy-5-isopropenyl-2,8-di | DPP4     |
| <i>Chrysanthemi Flos</i> | [(1S,5S,7S)-7-acetoxy-5-isopropenyl-2,8-di | NCOA2    |
| <i>Chrysanthemi Flos</i> | acacetin                                   | NOS2     |
| <i>Chrysanthemi Flos</i> | acacetin                                   | PTGS1    |
| <i>Chrysanthemi Flos</i> | acacetin                                   | AR       |
| <i>Chrysanthemi Flos</i> | acacetin                                   | PTGS2    |
| <i>Chrysanthemi Flos</i> | acacetin                                   | DPP4     |
| <i>Chrysanthemi Flos</i> | acacetin                                   | HSP90AA1 |
| <i>Chrysanthemi Flos</i> | acacetin                                   | CDK2     |
| <i>Chrysanthemi Flos</i> | acacetin                                   | PKIA     |
| <i>Chrysanthemi Flos</i> | acacetin                                   | PRSS1    |
| <i>Chrysanthemi Flos</i> | acacetin                                   | NCOA2    |
| <i>Chrysanthemi Flos</i> | acacetin                                   | NCOA1    |
| <i>Chrysanthemi Flos</i> | acacetin                                   | CALM2    |
| <i>Chrysanthemi Flos</i> | acacetin                                   | PIK3CG   |
| <i>Chrysanthemi Flos</i> | acacetin                                   | CHEK1    |
| <i>Chrysanthemi Flos</i> | acacetin                                   | ADRB2    |
| <i>Chrysanthemi Flos</i> | acacetin                                   | PDE3A    |
| <i>Chrysanthemi Flos</i> | acacetin                                   | RELA     |
| <i>Chrysanthemi Flos</i> | acacetin                                   | BCL2     |
| <i>Chrysanthemi Flos</i> | acacetin                                   | CDKN1A   |
| <i>Chrysanthemi Flos</i> | acacetin                                   | BAX      |
| <i>Chrysanthemi Flos</i> | acacetin                                   | CASP3    |
| <i>Chrysanthemi Flos</i> | acacetin                                   | TP53     |
| <i>Chrysanthemi Flos</i> | acacetin                                   | CASP8    |
| <i>Chrysanthemi Flos</i> | acacetin                                   | FASN     |
| <i>Chrysanthemi Flos</i> | acacetin                                   | FASLG    |
| <i>Chrysanthemi Flos</i> | acacetin                                   | CYP19A1  |
| <i>Chrysanthemi Flos</i> | Chryseriol                                 | NOS2     |
| <i>Chrysanthemi Flos</i> | Chryseriol                                 | PTGS1    |
| <i>Chrysanthemi Flos</i> | Chryseriol                                 | ESR1     |
| <i>Chrysanthemi Flos</i> | Chryseriol                                 | AR       |
| <i>Chrysanthemi Flos</i> | Chryseriol                                 | PPARG    |
| <i>Chrysanthemi Flos</i> | Chryseriol                                 | PTGS2    |
| <i>Chrysanthemi Flos</i> | Chryseriol                                 | DPP4     |
| <i>Chrysanthemi Flos</i> | Chryseriol                                 | MAPK14   |
| <i>Chrysanthemi Flos</i> | Chryseriol                                 | GSK3B    |
| <i>Chrysanthemi Flos</i> | Chryseriol                                 | HSP90AA1 |

|                          |              |          |
|--------------------------|--------------|----------|
| <i>Chrysanthemi Flos</i> | Chryseriol   | CDK2     |
| <i>Chrysanthemi Flos</i> | Chryseriol   | PIK3CG   |
| <i>Chrysanthemi Flos</i> | Chryseriol   | CHEK1    |
| <i>Chrysanthemi Flos</i> | Chryseriol   | PKIA     |
| <i>Chrysanthemi Flos</i> | Chryseriol   | PRSS1    |
| <i>Chrysanthemi Flos</i> | Chryseriol   | NCOA2    |
| <i>Chrysanthemi Flos</i> | Chryseriol   | NCOA1    |
| <i>Chrysanthemi Flos</i> | Chryseriol   | CALM2    |
| <i>Chrysanthemi Flos</i> | isorhamnetin | NOS2     |
| <i>Chrysanthemi Flos</i> | isorhamnetin | PTGS1    |
| <i>Chrysanthemi Flos</i> | isorhamnetin | ESR1     |
| <i>Chrysanthemi Flos</i> | isorhamnetin | AR       |
| <i>Chrysanthemi Flos</i> | isorhamnetin | PPARG    |
| <i>Chrysanthemi Flos</i> | isorhamnetin | PTGS2    |
| <i>Chrysanthemi Flos</i> | isorhamnetin | PTPN1    |
| <i>Chrysanthemi Flos</i> | isorhamnetin | ESR2     |
| <i>Chrysanthemi Flos</i> | isorhamnetin | DPP4     |
| <i>Chrysanthemi Flos</i> | isorhamnetin | MAPK14   |
| <i>Chrysanthemi Flos</i> | isorhamnetin | GSK3B    |
| <i>Chrysanthemi Flos</i> | isorhamnetin | HSP90AA1 |
| <i>Chrysanthemi Flos</i> | isorhamnetin | CDK2     |
| <i>Chrysanthemi Flos</i> | isorhamnetin | PIK3CG   |
| <i>Chrysanthemi Flos</i> | isorhamnetin | PKIA     |
| <i>Chrysanthemi Flos</i> | isorhamnetin | PRSS1    |
| <i>Chrysanthemi Flos</i> | isorhamnetin | PIM1     |
| <i>Chrysanthemi Flos</i> | isorhamnetin | CCNA2    |
| <i>Chrysanthemi Flos</i> | isorhamnetin | NCOA2    |
| <i>Chrysanthemi Flos</i> | isorhamnetin | CALM2    |
| <i>Chrysanthemi Flos</i> | isorhamnetin | PYGM     |
| <i>Chrysanthemi Flos</i> | isorhamnetin | PPARD    |
| <i>Chrysanthemi Flos</i> | isorhamnetin | CHEK1    |
| <i>Chrysanthemi Flos</i> | isorhamnetin | AKR1B1   |
| <i>Chrysanthemi Flos</i> | isorhamnetin | NCOA1    |
| <i>Chrysanthemi Flos</i> | isorhamnetin | F7       |
| <i>Chrysanthemi Flos</i> | isorhamnetin | F2       |
| <i>Chrysanthemi Flos</i> | isorhamnetin | NOS3     |
| <i>Chrysanthemi Flos</i> | isorhamnetin | ACHE     |
| <i>Chrysanthemi Flos</i> | isorhamnetin | GABRA1   |
| <i>Chrysanthemi Flos</i> | isorhamnetin | MAOB     |
| <i>Chrysanthemi Flos</i> | isorhamnetin | GRIA2    |
| <i>Chrysanthemi Flos</i> | isorhamnetin | RELA     |
| <i>Chrysanthemi Flos</i> | isorhamnetin | XDH      |
| <i>Chrysanthemi Flos</i> | isorhamnetin | NCF1     |
| <i>Chrysanthemi Flos</i> | isorhamnetin | OLR1     |
| <i>Chrysanthemi Flos</i> | kaempferol   | NOS2     |
| <i>Chrysanthemi Flos</i> | kaempferol   | PTGS1    |
| <i>Chrysanthemi Flos</i> | kaempferol   | AR       |
| <i>Chrysanthemi Flos</i> | kaempferol   | PPARG    |
| <i>Chrysanthemi Flos</i> | kaempferol   | PTGS2    |
| <i>Chrysanthemi Flos</i> | kaempferol   | HSP90AA1 |
| <i>Chrysanthemi Flos</i> | kaempferol   | PIK3CG   |
| <i>Chrysanthemi Flos</i> | kaempferol   | PKIA     |
| <i>Chrysanthemi Flos</i> | kaempferol   | NCOA2    |
| <i>Chrysanthemi Flos</i> | kaempferol   | DPP4     |
| <i>Chrysanthemi Flos</i> | kaempferol   | PRSS1    |
| <i>Chrysanthemi Flos</i> | kaempferol   | PGR      |
| <i>Chrysanthemi Flos</i> | kaempferol   | F2       |
| <i>Chrysanthemi Flos</i> | kaempferol   | CHRM1    |

|                          |                                                                  |          |
|--------------------------|------------------------------------------------------------------|----------|
| <i>Chrysanthemi Flos</i> | kaempferol                                                       | NOS3     |
| <i>Chrysanthemi Flos</i> | kaempferol                                                       | GABRA2   |
| <i>Chrysanthemi Flos</i> | kaempferol                                                       | ACHE     |
| <i>Chrysanthemi Flos</i> | kaempferol                                                       | SLC6A2   |
| <i>Chrysanthemi Flos</i> | kaempferol                                                       | CHRM2    |
| <i>Chrysanthemi Flos</i> | kaempferol                                                       | ADRA1B   |
| <i>Chrysanthemi Flos</i> | kaempferol                                                       | GABRA1   |
| <i>Chrysanthemi Flos</i> | kaempferol                                                       | TOP2A    |
| <i>Chrysanthemi Flos</i> | kaempferol                                                       | F7       |
| <i>Chrysanthemi Flos</i> | kaempferol                                                       | CALM2    |
| <i>Chrysanthemi Flos</i> | kaempferol                                                       | RELA     |
| <i>Chrysanthemi Flos</i> | kaempferol                                                       | IKBKB    |
| <i>Chrysanthemi Flos</i> | kaempferol                                                       | AKT1     |
| <i>Chrysanthemi Flos</i> | kaempferol                                                       | BCL2     |
| <i>Chrysanthemi Flos</i> | kaempferol                                                       | BAX      |
| <i>Chrysanthemi Flos</i> | kaempferol                                                       | CD40LG   |
| <i>Chrysanthemi Flos</i> | kaempferol                                                       | JUN      |
| <i>Chrysanthemi Flos</i> | kaempferol                                                       | AHSA1    |
| <i>Chrysanthemi Flos</i> | kaempferol                                                       | CASP3    |
| <i>Chrysanthemi Flos</i> | kaempferol                                                       | MAPK8    |
| <i>Chrysanthemi Flos</i> | kaempferol                                                       | XDH      |
| <i>Chrysanthemi Flos</i> | kaempferol                                                       | MMP1     |
| <i>Chrysanthemi Flos</i> | kaempferol                                                       | STAT1    |
| <i>Chrysanthemi Flos</i> | kaempferol                                                       | CDK1     |
| <i>Chrysanthemi Flos</i> | kaempferol                                                       | PPARG    |
| <i>Chrysanthemi Flos</i> | kaempferol                                                       | HMOX1    |
| <i>Chrysanthemi Flos</i> | kaempferol                                                       | CYP3A4   |
| <i>Chrysanthemi Flos</i> | kaempferol                                                       | CYP1A1   |
| <i>Chrysanthemi Flos</i> | kaempferol                                                       | ICAM1    |
| <i>Chrysanthemi Flos</i> | kaempferol                                                       | SELE     |
| <i>Chrysanthemi Flos</i> | kaempferol                                                       | VCAM1    |
| <i>Chrysanthemi Flos</i> | kaempferol                                                       | NR1I2    |
| <i>Chrysanthemi Flos</i> | kaempferol                                                       | CYP1B1   |
| <i>Chrysanthemi Flos</i> | kaempferol                                                       | ALOX5    |
| <i>Chrysanthemi Flos</i> | kaempferol                                                       | HAS2     |
| <i>Chrysanthemi Flos</i> | kaempferol                                                       | AHR      |
| <i>Chrysanthemi Flos</i> | kaempferol                                                       | PSMD3    |
| <i>Chrysanthemi Flos</i> | kaempferol                                                       | SLC2A4   |
| <i>Chrysanthemi Flos</i> | kaempferol                                                       | NR1I3    |
| <i>Chrysanthemi Flos</i> | kaempferol                                                       | INSR     |
| <i>Chrysanthemi Flos</i> | kaempferol                                                       | DIO1     |
| <i>Chrysanthemi Flos</i> | kaempferol                                                       | PPP3CA   |
| <i>Chrysanthemi Flos</i> | kaempferol                                                       | GSTM1    |
| <i>Chrysanthemi Flos</i> | kaempferol                                                       | GSTM2    |
| <i>Chrysanthemi Flos</i> | kaempferol                                                       | AKR1C3   |
| <i>Chrysanthemi Flos</i> | kaempferol                                                       | SLPI     |
| <i>Chrysanthemi Flos</i> | 5,7-dihydroxy-2-(3-hydroxy-4-methoxyphenyl)-4-methyl-3H-chromene | PTGS1    |
| <i>Chrysanthemi Flos</i> | 5,7-dihydroxy-2-(3-hydroxy-4-methoxyphenyl)-4-methyl-3H-chromene | PTGS2    |
| <i>Chrysanthemi Flos</i> | 5,7-dihydroxy-2-(3-hydroxy-4-methoxyphenyl)-4-methyl-3H-chromene | HSP90AA1 |
| <i>Chrysanthemi Flos</i> | 5,7-dihydroxy-2-(3-hydroxy-4-methoxyphenyl)-4-methyl-3H-chromene | PKIA     |
| <i>Chrysanthemi Flos</i> | 5,7-dihydroxy-2-(3-hydroxy-4-methoxyphenyl)-4-methyl-3H-chromene | CALM2    |
| <i>Chrysanthemi Flos</i> | 5,7-dihydroxy-2-(3-hydroxy-4-methoxyphenyl)-4-methyl-3H-chromene | SCN5A    |
| <i>Chrysanthemi Flos</i> | 5,7-dihydroxy-2-(3-hydroxy-4-methoxyphenyl)-4-methyl-3H-chromene | PIK3CG   |
| <i>Chrysanthemi Flos</i> | 5,7-dihydroxy-2-(3-hydroxy-4-methoxyphenyl)-4-methyl-3H-chromene | NCOA2    |
| <i>Chrysanthemi Flos</i> | 5,7-dihydroxy-2-(3-hydroxy-4-methoxyphenyl)-4-methyl-3H-chromene | NCOA1    |
| <i>Chrysanthemi Flos</i> | 5,7-dihydroxy-2-(3-hydroxy-4-methoxyphenyl)-4-methyl-3H-chromene | TOP2A    |
| <i>Chrysanthemi Flos</i> | luteolin                                                         | PTGS1    |
| <i>Chrysanthemi Flos</i> | luteolin                                                         | AR       |



|                          |           |          |
|--------------------------|-----------|----------|
| <i>Chrysanthemi Flos</i> | luteolin  | PTGS2    |
| <i>Chrysanthemi Flos</i> | luteolin  | HSP90AA1 |
| <i>Chrysanthemi Flos</i> | luteolin  | PRSS1    |
| <i>Chrysanthemi Flos</i> | luteolin  | NCOA2    |
| <i>Chrysanthemi Flos</i> | luteolin  | PKIA     |
| <i>Chrysanthemi Flos</i> | luteolin  | DPP4     |
| <i>Chrysanthemi Flos</i> | luteolin  | PIK3CG   |
| <i>Chrysanthemi Flos</i> | luteolin  | RELA     |
| <i>Chrysanthemi Flos</i> | luteolin  | EGFR     |
| <i>Chrysanthemi Flos</i> | luteolin  | AKT1     |
| <i>Chrysanthemi Flos</i> | luteolin  | CCND1    |
| <i>Chrysanthemi Flos</i> | luteolin  | BCL2L1   |
| <i>Chrysanthemi Flos</i> | luteolin  | CDKN1A   |
| <i>Chrysanthemi Flos</i> | luteolin  | CASP9    |
| <i>Chrysanthemi Flos</i> | luteolin  | MMP2     |
| <i>Chrysanthemi Flos</i> | luteolin  | MMP9     |
| <i>Chrysanthemi Flos</i> | luteolin  | MAPK1    |
| <i>Chrysanthemi Flos</i> | luteolin  | IL10     |
| <i>Chrysanthemi Flos</i> | luteolin  | RB1      |
| <i>Chrysanthemi Flos</i> | luteolin  | CDK4     |
| <i>Chrysanthemi Flos</i> | luteolin  | CD40LG   |
| <i>Chrysanthemi Flos</i> | luteolin  | JUN      |
| <i>Chrysanthemi Flos</i> | luteolin  | IL6      |
| <i>Chrysanthemi Flos</i> | luteolin  | CASP3    |
| <i>Chrysanthemi Flos</i> | luteolin  | TP53     |
| <i>Chrysanthemi Flos</i> | luteolin  | NFKBIA   |
| <i>Chrysanthemi Flos</i> | luteolin  | XDH      |
| <i>Chrysanthemi Flos</i> | luteolin  | TOP1     |
| <i>Chrysanthemi Flos</i> | luteolin  | MDM2     |
| <i>Chrysanthemi Flos</i> | luteolin  | APP      |
| <i>Chrysanthemi Flos</i> | luteolin  | MMP1     |
| <i>Chrysanthemi Flos</i> | luteolin  | PCNA     |
| <i>Chrysanthemi Flos</i> | luteolin  | ERBB2    |
| <i>Chrysanthemi Flos</i> | luteolin  | PPARG    |
| <i>Chrysanthemi Flos</i> | luteolin  | HMOX1    |
| <i>Chrysanthemi Flos</i> | luteolin  | CASP7    |
| <i>Chrysanthemi Flos</i> | luteolin  | ICAM1    |
| <i>Chrysanthemi Flos</i> | luteolin  | MCL1     |
| <i>Chrysanthemi Flos</i> | luteolin  | BIRC5    |
| <i>Chrysanthemi Flos</i> | luteolin  | IL2      |
| <i>Chrysanthemi Flos</i> | luteolin  | CCNB1    |
| <i>Chrysanthemi Flos</i> | luteolin  | TYR      |
| <i>Chrysanthemi Flos</i> | luteolin  | IFNG     |
| <i>Chrysanthemi Flos</i> | luteolin  | IL4      |
| <i>Chrysanthemi Flos</i> | luteolin  | TOP2A    |
| <i>Chrysanthemi Flos</i> | luteolin  | XIAP     |
| <i>Chrysanthemi Flos</i> | luteolin  | SLC2A4   |
| <i>Chrysanthemi Flos</i> | luteolin  | INSR     |
| <i>Chrysanthemi Flos</i> | luteolin  | CD40LG   |
| <i>Chrysanthemi Flos</i> | luteolin  | PTGES    |
| <i>Chrysanthemi Flos</i> | luteolin  | NUF2     |
| <i>Chrysanthemi Flos</i> | luteolin  | ADCY2    |
| <i>Chrysanthemi Flos</i> | luteolin  | MET      |
| <i>Chrysanthemi Flos</i> | EUPATORIN | NOS2     |
| <i>Chrysanthemi Flos</i> | EUPATORIN | PTGS1    |
| <i>Chrysanthemi Flos</i> | EUPATORIN | F2       |
| <i>Chrysanthemi Flos</i> | EUPATORIN | SCN5A    |
| <i>Chrysanthemi Flos</i> | EUPATORIN | F10      |

|                          |            |          |
|--------------------------|------------|----------|
| <i>Chrysanthemi Flos</i> | EUPATORIN  | PTGS2    |
| <i>Chrysanthemi Flos</i> | EUPATORIN  | F7       |
| <i>Chrysanthemi Flos</i> | EUPATORIN  | TOP2A    |
| <i>Chrysanthemi Flos</i> | EUPATORIN  | DPP4     |
| <i>Chrysanthemi Flos</i> | EUPATORIN  | HSP90AA1 |
| <i>Chrysanthemi Flos</i> | EUPATORIN  | PRSS1    |
| <i>Chrysanthemi Flos</i> | EUPATORIN  | NCOA2    |
| <i>Chrysanthemi Flos</i> | EUPATORIN  | NCOA1    |
| <i>Chrysanthemi Flos</i> | EUPATORIN  | CALM2    |
| <i>Chrysanthemi Flos</i> | Diosmetin  | NOS2     |
| <i>Chrysanthemi Flos</i> | Diosmetin  | PTGS1    |
| <i>Chrysanthemi Flos</i> | Diosmetin  | PTGS2    |
| <i>Chrysanthemi Flos</i> | Diosmetin  | DPP4     |
| <i>Chrysanthemi Flos</i> | Diosmetin  | HSP90AA1 |
| <i>Chrysanthemi Flos</i> | Diosmetin  | PKIA     |
| <i>Chrysanthemi Flos</i> | Diosmetin  | PRSS1    |
| <i>Chrysanthemi Flos</i> | Diosmetin  | NCOA2    |
| <i>Chrysanthemi Flos</i> | Diosmetin  | NCOA1    |
| <i>Chrysanthemi Flos</i> | Diosmetin  | CALM2    |
| <i>Chrysanthemi Flos</i> | naringenin | PTGS1    |
| <i>Chrysanthemi Flos</i> | naringenin | ESR1     |
| <i>Chrysanthemi Flos</i> | naringenin | PTGS2    |
| <i>Chrysanthemi Flos</i> | naringenin | HSP90AA1 |
| <i>Chrysanthemi Flos</i> | naringenin | LACTBL1  |
| <i>Chrysanthemi Flos</i> | naringenin | PKIA     |
| <i>Chrysanthemi Flos</i> | naringenin | PIK3CG   |
| <i>Chrysanthemi Flos</i> | naringenin | RELA     |
| <i>Chrysanthemi Flos</i> | naringenin | AKT1     |
| <i>Chrysanthemi Flos</i> | naringenin | BCL2     |
| <i>Chrysanthemi Flos</i> | naringenin | MAPK3    |
| <i>Chrysanthemi Flos</i> | naringenin | MAPK1    |
| <i>Chrysanthemi Flos</i> | naringenin | CASP3    |
| <i>Chrysanthemi Flos</i> | naringenin | FASN     |
| <i>Chrysanthemi Flos</i> | naringenin | LDLR     |
| <i>Chrysanthemi Flos</i> | naringenin | BAD      |
| <i>Chrysanthemi Flos</i> | naringenin | SOD1     |
| <i>Chrysanthemi Flos</i> | naringenin | PPARG    |
| <i>Chrysanthemi Flos</i> | naringenin | MTTP     |
| <i>Chrysanthemi Flos</i> | naringenin | APOB     |
| <i>Chrysanthemi Flos</i> | naringenin | PLB1     |
| <i>Chrysanthemi Flos</i> | naringenin | HMGCR    |
| <i>Chrysanthemi Flos</i> | naringenin | CYP19A1  |
| <i>Chrysanthemi Flos</i> | naringenin | UGT1A8   |
| <i>Chrysanthemi Flos</i> | naringenin | PPARA    |
| <i>Chrysanthemi Flos</i> | naringenin | SREBF1   |
| <i>Chrysanthemi Flos</i> | naringenin | GSR      |
| <i>Chrysanthemi Flos</i> | naringenin | ABCC1    |
| <i>Chrysanthemi Flos</i> | naringenin | ADIPOQ   |
| <i>Chrysanthemi Flos</i> | naringenin | SOAT2    |
| <i>Chrysanthemi Flos</i> | naringenin | AKR1C1   |
| <i>Chrysanthemi Flos</i> | naringenin | GOT1     |
| <i>Chrysanthemi Flos</i> | naringenin | ABAT     |
| <i>Chrysanthemi Flos</i> | naringenin | CES1     |
| <i>Chrysanthemi Flos</i> | naringenin | SOAT1    |
| <i>Chrysanthemi Flos</i> | Artemetin  | NOS2     |
| <i>Chrysanthemi Flos</i> | Artemetin  | F2       |
| <i>Chrysanthemi Flos</i> | Artemetin  | KCNH2    |
| <i>Chrysanthemi Flos</i> | Artemetin  | ESR1     |

|                          |              |          |
|--------------------------|--------------|----------|
| <i>Chrysanthemi Flos</i> | Artemetin    | AR       |
| <i>Chrysanthemi Flos</i> | Artemetin    | SCN5A    |
| <i>Chrysanthemi Flos</i> | Artemetin    | PPARG    |
| <i>Chrysanthemi Flos</i> | Artemetin    | F10      |
| <i>Chrysanthemi Flos</i> | Artemetin    | PTGS2    |
| <i>Chrysanthemi Flos</i> | Artemetin    | F7       |
| <i>Chrysanthemi Flos</i> | Artemetin    | PTPN1    |
| <i>Chrysanthemi Flos</i> | Artemetin    | TOP2A    |
| <i>Chrysanthemi Flos</i> | Artemetin    | ESR2     |
| <i>Chrysanthemi Flos</i> | Artemetin    | DPP4     |
| <i>Chrysanthemi Flos</i> | Artemetin    | MAPK14   |
| <i>Chrysanthemi Flos</i> | Artemetin    | GSK3B    |
| <i>Chrysanthemi Flos</i> | Artemetin    | HSP90AA1 |
| <i>Chrysanthemi Flos</i> | Artemetin    | CDK2     |
| <i>Chrysanthemi Flos</i> | Artemetin    | CHEK1    |
| <i>Chrysanthemi Flos</i> | Artemetin    | PRSS1    |
| <i>Chrysanthemi Flos</i> | Artemetin    | NCOA2    |
| <i>Chrysanthemi Flos</i> | Artemetin    | KCNMA1   |
| <i>Chrysanthemi Flos</i> | Artemetin    | CALM2    |
| <i>licorice</i>          | Jaranol      | NOS2     |
| <i>licorice</i>          | Jaranol      | PTGS1    |
| <i>licorice</i>          | Jaranol      | AR       |
| <i>licorice</i>          | Jaranol      | SCN5A    |
| <i>licorice</i>          | Jaranol      | PTGS2    |
| <i>licorice</i>          | Jaranol      | ESR2     |
| <i>licorice</i>          | Jaranol      | DPP4     |
| <i>licorice</i>          | Jaranol      | HSP90AA1 |
| <i>licorice</i>          | Jaranol      | CDK2     |
| <i>licorice</i>          | Jaranol      | CHEK1    |
| <i>licorice</i>          | Jaranol      | PRSS1    |
| <i>licorice</i>          | Jaranol      | NCOA2    |
| <i>licorice</i>          | Jaranol      | CALM2    |
| <i>licorice</i>          | isorhamnetin | NOS2     |
| <i>licorice</i>          | isorhamnetin | PTGS1    |
| <i>licorice</i>          | isorhamnetin | ESR1     |
| <i>licorice</i>          | isorhamnetin | AR       |
| <i>licorice</i>          | isorhamnetin | PPARG    |
| <i>licorice</i>          | isorhamnetin | PTGS2    |
| <i>licorice</i>          | isorhamnetin | PTPN1    |
| <i>licorice</i>          | isorhamnetin | ESR2     |
| <i>licorice</i>          | isorhamnetin | DPP4     |
| <i>licorice</i>          | isorhamnetin | MAPK14   |
| <i>licorice</i>          | isorhamnetin | GSK3B    |
| <i>licorice</i>          | isorhamnetin | HSP90AA1 |
| <i>licorice</i>          | isorhamnetin | CDK2     |
| <i>licorice</i>          | isorhamnetin | PIK3CG   |
| <i>licorice</i>          | isorhamnetin | PKIA     |
| <i>licorice</i>          | isorhamnetin | PRSS1    |
| <i>licorice</i>          | isorhamnetin | PIM1     |
| <i>licorice</i>          | isorhamnetin | CCNA2    |
| <i>licorice</i>          | isorhamnetin | NCOA2    |
| <i>licorice</i>          | isorhamnetin | CALM2    |
| <i>licorice</i>          | isorhamnetin | PYGM     |
| <i>licorice</i>          | isorhamnetin | PPARD    |
| <i>licorice</i>          | isorhamnetin | CHEK1    |
| <i>licorice</i>          | isorhamnetin | AKR1B1   |
| <i>licorice</i>          | isorhamnetin | NCOA1    |
| <i>licorice</i>          | isorhamnetin | F7       |

|                 |              |          |
|-----------------|--------------|----------|
| <i>licorice</i> | isorhamnetin | F2       |
| <i>licorice</i> | isorhamnetin | NOS3     |
| <i>licorice</i> | isorhamnetin | ACHE     |
| <i>licorice</i> | isorhamnetin | GABRA1   |
| <i>licorice</i> | isorhamnetin | MAOB     |
| <i>licorice</i> | isorhamnetin | GRIA2    |
| <i>licorice</i> | isorhamnetin | RELA     |
| <i>licorice</i> | isorhamnetin | XDH      |
| <i>licorice</i> | isorhamnetin | NCF1     |
| <i>licorice</i> | isorhamnetin | OLR1     |
| <i>licorice</i> | formononetin | NOS2     |
| <i>licorice</i> | formononetin | PTGS1    |
| <i>licorice</i> | formononetin | CHRM1    |
| <i>licorice</i> | formononetin | ESR1     |
| <i>licorice</i> | formononetin | AR       |
| <i>licorice</i> | formononetin | PPARG    |
| <i>licorice</i> | formononetin | PTGS2    |
| <i>licorice</i> | formononetin | RXRA     |
| <i>licorice</i> | formononetin | PDE3A    |
| <i>licorice</i> | formononetin | ADRA1D   |
| <i>licorice</i> | formononetin | SLC6A3   |
| <i>licorice</i> | formononetin | ADRB2    |
| <i>licorice</i> | formononetin | SLC6A4   |
| <i>licorice</i> | formononetin | ESR2     |
| <i>licorice</i> | formononetin | DPP4     |
| <i>licorice</i> | formononetin | MAPK14   |
| <i>licorice</i> | formononetin | GSK3B    |
| <i>licorice</i> | formononetin | HSP90AA1 |
| <i>licorice</i> | formononetin | CDK2     |
| <i>licorice</i> | formononetin | MAOB     |
| <i>licorice</i> | formononetin | CHEK1    |
| <i>licorice</i> | formononetin | PKIA     |
| <i>licorice</i> | formononetin | PRSS1    |
| <i>licorice</i> | formononetin | PIM1     |
| <i>licorice</i> | formononetin | CCNA2    |
| <i>licorice</i> | formononetin | CALM2    |
| <i>licorice</i> | formononetin | PKIA     |
| <i>licorice</i> | formononetin | F2       |
| <i>licorice</i> | formononetin | NOS3     |
| <i>licorice</i> | formononetin | ACHE     |
| <i>licorice</i> | formononetin | LACTBL1  |
| <i>licorice</i> | formononetin | JUN      |
| <i>licorice</i> | formononetin | PPARG    |
| <i>licorice</i> | formononetin | IL4      |
| <i>licorice</i> | formononetin | SIRT1    |
| <i>licorice</i> | formononetin | ATP5B    |
| <i>licorice</i> | formononetin | MT-ND6   |
| <i>licorice</i> | formononetin | HSD3B2   |
| <i>licorice</i> | formononetin | HSD3B1   |
| <i>licorice</i> | Calycosin    | NOS2     |
| <i>licorice</i> | Calycosin    | PTGS1    |
| <i>licorice</i> | Calycosin    | ESR1     |
| <i>licorice</i> | Calycosin    | AR       |
| <i>licorice</i> | Calycosin    | PPARG    |
| <i>licorice</i> | Calycosin    | PTGS2    |
| <i>licorice</i> | Calycosin    | RXRA     |
| <i>licorice</i> | Calycosin    | PDE3A    |
| <i>licorice</i> | Calycosin    | ESR2     |

|                 |            |          |
|-----------------|------------|----------|
| <i>licorice</i> | Calycosin  | DPP4     |
| <i>licorice</i> | Calycosin  | MAPK14   |
| <i>licorice</i> | Calycosin  | GSK3B    |
| <i>licorice</i> | Calycosin  | HSP90AA1 |
| <i>licorice</i> | Calycosin  | CDK2     |
| <i>licorice</i> | Calycosin  | CHEK1    |
| <i>licorice</i> | Calycosin  | PKIA     |
| <i>licorice</i> | Calycosin  | PRSS1    |
| <i>licorice</i> | Calycosin  | PIM1     |
| <i>licorice</i> | Calycosin  | CCNA2    |
| <i>licorice</i> | Calycosin  | NCOA2    |
| <i>licorice</i> | Calycosin  | CALM2    |
| <i>licorice</i> | Calycosin  | ADRB2    |
| <i>licorice</i> | kaempferol | NOS2     |
| <i>licorice</i> | kaempferol | PTGS1    |
| <i>licorice</i> | kaempferol | AR       |
| <i>licorice</i> | kaempferol | PPARG    |
| <i>licorice</i> | kaempferol | PTGS2    |
| <i>licorice</i> | kaempferol | HSP90AA1 |
| <i>licorice</i> | kaempferol | PIK3CG   |
| <i>licorice</i> | kaempferol | PKIA     |
| <i>licorice</i> | kaempferol | NCOA2    |
| <i>licorice</i> | kaempferol | DPP4     |
| <i>licorice</i> | kaempferol | PRSS1    |
| <i>licorice</i> | kaempferol | PGR      |
| <i>licorice</i> | kaempferol | F2       |
| <i>licorice</i> | kaempferol | CHRM1    |
| <i>licorice</i> | kaempferol | NOS3     |
| <i>licorice</i> | kaempferol | GABRA2   |
| <i>licorice</i> | kaempferol | ACHE     |
| <i>licorice</i> | kaempferol | SLC6A2   |
| <i>licorice</i> | kaempferol | CHRM2    |
| <i>licorice</i> | kaempferol | ADRA1B   |
| <i>licorice</i> | kaempferol | GABRA1   |
| <i>licorice</i> | kaempferol | TOP2A    |
| <i>licorice</i> | kaempferol | F7       |
| <i>licorice</i> | kaempferol | CALM2    |
| <i>licorice</i> | kaempferol | RELA     |
| <i>licorice</i> | kaempferol | IKBKB    |
| <i>licorice</i> | kaempferol | AKT1     |
| <i>licorice</i> | kaempferol | BCL2     |
| <i>licorice</i> | kaempferol | BAX      |
| <i>licorice</i> | kaempferol | CD40LG   |
| <i>licorice</i> | kaempferol | JUN      |
| <i>licorice</i> | kaempferol | AHSA1    |
| <i>licorice</i> | kaempferol | CASP3    |
| <i>licorice</i> | kaempferol | MAPK8    |
| <i>licorice</i> | kaempferol | XDH      |
| <i>licorice</i> | kaempferol | MMP1     |
| <i>licorice</i> | kaempferol | STAT1    |
| <i>licorice</i> | kaempferol | CDK1     |
| <i>licorice</i> | kaempferol | PPARG    |
| <i>licorice</i> | kaempferol | HMOX1    |
| <i>licorice</i> | kaempferol | CYP3A4   |
| <i>licorice</i> | kaempferol | CYP1A1   |
| <i>licorice</i> | kaempferol | ICAM1    |
| <i>licorice</i> | kaempferol | SELE     |
| <i>licorice</i> | kaempferol | VCAM1    |

|                 |                |          |
|-----------------|----------------|----------|
| <i>licorice</i> | kaempferol     | NR1I2    |
| <i>licorice</i> | kaempferol     | CYP1B1   |
| <i>licorice</i> | kaempferol     | ALOX5    |
| <i>licorice</i> | kaempferol     | HAS2     |
| <i>licorice</i> | kaempferol     | AHR      |
| <i>licorice</i> | kaempferol     | PSMD3    |
| <i>licorice</i> | kaempferol     | SLC2A4   |
| <i>licorice</i> | kaempferol     | NR1I3    |
| <i>licorice</i> | kaempferol     | INSR     |
| <i>licorice</i> | kaempferol     | DIO1     |
| <i>licorice</i> | kaempferol     | PPP3CA   |
| <i>licorice</i> | kaempferol     | GSTM1    |
| <i>licorice</i> | kaempferol     | GSTM2    |
| <i>licorice</i> | kaempferol     | AKR1C3   |
| <i>licorice</i> | kaempferol     | SLPI     |
| <i>licorice</i> | licochalcone a | NOS2     |
| <i>licorice</i> | licochalcone a | PTGS1    |
| <i>licorice</i> | licochalcone a | CHRM1    |
| <i>licorice</i> | licochalcone a | ESR1     |
| <i>licorice</i> | licochalcone a | AR       |
| <i>licorice</i> | licochalcone a | SCN5A    |
| <i>licorice</i> | licochalcone a | PPARG    |
| <i>licorice</i> | licochalcone a | F10      |
| <i>licorice</i> | licochalcone a | PTGS2    |
| <i>licorice</i> | licochalcone a | CA2      |
| <i>licorice</i> | licochalcone a | ADRA1B   |
| <i>licorice</i> | licochalcone a | SLC6A3   |
| <i>licorice</i> | licochalcone a | ESR2     |
| <i>licorice</i> | licochalcone a | MAPK14   |
| <i>licorice</i> | licochalcone a | GSK3B    |
| <i>licorice</i> | licochalcone a | HSP90AA1 |
| <i>licorice</i> | licochalcone a | CDK2     |
| <i>licorice</i> | licochalcone a | CHEK1    |
| <i>licorice</i> | licochalcone a | PIM1     |
| <i>licorice</i> | licochalcone a | CCNA2    |
| <i>licorice</i> | licochalcone a | CALM2    |
| <i>licorice</i> | licochalcone a | ADRB2    |
| <i>licorice</i> | licochalcone a | NCOA2    |
| <i>licorice</i> | licochalcone a | RELA     |
| <i>licorice</i> | licochalcone a | STAT3    |
| <i>licorice</i> | licochalcone a | CCND1    |
| <i>licorice</i> | licochalcone a | BCL2     |
| <i>licorice</i> | licochalcone a | EIF6     |
| <i>licorice</i> | licochalcone a | MAPK1    |
| <i>licorice</i> | licochalcone a | RB1      |
| <i>licorice</i> | licochalcone a | CDK4     |
| <i>licorice</i> | licochalcone a | FOSL2    |
| <i>licorice</i> | Inermine       | PTGS1    |
| <i>licorice</i> | Inermine       | CHRM3    |
| <i>licorice</i> | Inermine       | SCN5A    |
| <i>licorice</i> | Inermine       | PTGS2    |
| <i>licorice</i> | Inermine       | RXRA     |
| <i>licorice</i> | Inermine       | ADRA1B   |
| <i>licorice</i> | Inermine       | ADRA1D   |
| <i>licorice</i> | Inermine       | PIK3CG   |
| <i>licorice</i> | Inermine       | PKIA     |
| <i>licorice</i> | Inermine       | PRSS1    |
| <i>licorice</i> | Inermine       | CALM2    |

|                 |            |          |
|-----------------|------------|----------|
| <i>licorice</i> | Inermine   | CHRM1    |
| <i>licorice</i> | Inermine   | ADRB2    |
| <i>licorice</i> | Inermine   | OPRM1    |
| <i>licorice</i> | Inermine   | HSP90AA1 |
| <i>licorice</i> | DFV        | PTGS1    |
| <i>licorice</i> | DFV        | ESR1     |
| <i>licorice</i> | DFV        | PTGS2    |
| <i>licorice</i> | DFV        | RXRA     |
| <i>licorice</i> | DFV        | ADRB2    |
| <i>licorice</i> | DFV        | HSP90AA1 |
| <i>licorice</i> | DFV        | PIK3CG   |
| <i>licorice</i> | DFV        | PKIA     |
| <i>licorice</i> | DFV        | LACTBL1  |
| <i>licorice</i> | DFV        | MAOB     |
| <i>licorice</i> | DFV        | SLC6A4   |
| <i>licorice</i> | DFV        | PKIA     |
| <i>licorice</i> | Glycyrol   | NOS2     |
| <i>licorice</i> | Glycyrol   | ESR1     |
| <i>licorice</i> | Glycyrol   | PPARG    |
| <i>licorice</i> | Glycyrol   | PTGS2    |
| <i>licorice</i> | Glycyrol   | KDR      |
| <i>licorice</i> | Glycyrol   | MAPK14   |
| <i>licorice</i> | Glycyrol   | GSK3B    |
| <i>licorice</i> | Glycyrol   | CHEK1    |
| <i>licorice</i> | Glycyrol   | PIM1     |
| <i>licorice</i> | Glycyrol   | CCNA2    |
| <i>licorice</i> | Glycyrol   | F2       |
| <i>licorice</i> | Medicarpin | NOS2     |
| <i>licorice</i> | Medicarpin | PTGS1    |
| <i>licorice</i> | Medicarpin | DRD1     |
| <i>licorice</i> | Medicarpin | CHRM3    |
| <i>licorice</i> | Medicarpin | CHRM1    |
| <i>licorice</i> | Medicarpin | ESR1     |
| <i>licorice</i> | Medicarpin | SCN5A    |
| <i>licorice</i> | Medicarpin | CHRM5    |
| <i>licorice</i> | Medicarpin | PTGS2    |
| <i>licorice</i> | Medicarpin | CHRM4    |
| <i>licorice</i> | Medicarpin | RXRA     |
| <i>licorice</i> | Medicarpin | HTR2A    |
| <i>licorice</i> | Medicarpin | ADRA1D   |
| <i>licorice</i> | Medicarpin | CHRM2    |
| <i>licorice</i> | Medicarpin | ADRA1B   |
| <i>licorice</i> | Medicarpin | SLC6A3   |
| <i>licorice</i> | Medicarpin | ADRB2    |
| <i>licorice</i> | Medicarpin | SLC6A4   |
| <i>licorice</i> | Medicarpin | OPRM1    |
| <i>licorice</i> | Medicarpin | ESR2     |
| <i>licorice</i> | Medicarpin | DPP4     |
| <i>licorice</i> | Medicarpin | MAPK10   |
| <i>licorice</i> | Medicarpin | HSP90AA1 |
| <i>licorice</i> | Medicarpin | CDK2     |
| <i>licorice</i> | Medicarpin | PIK3CG   |
| <i>licorice</i> | Medicarpin | CHRNA7   |
| <i>licorice</i> | Medicarpin | PKIA     |
| <i>licorice</i> | Medicarpin | PRSS1    |
| <i>licorice</i> | Medicarpin | PIM1     |
| <i>licorice</i> | Medicarpin | CCNA2    |
| <i>licorice</i> | Medicarpin | CALM2    |

|                 |                               |          |
|-----------------|-------------------------------|----------|
| <i>licorice</i> | Medicarpin                    | OPRD1    |
| <i>licorice</i> | Medicarpin                    | PDE3A    |
| <i>licorice</i> | Medicarpin                    | ADRA1D   |
| <i>licorice</i> | Lupiwighteone                 | NOS2     |
| <i>licorice</i> | Lupiwighteone                 | F2       |
| <i>licorice</i> | Lupiwighteone                 | ESR1     |
| <i>licorice</i> | Lupiwighteone                 | AR       |
| <i>licorice</i> | Lupiwighteone                 | SCN5A    |
| <i>licorice</i> | Lupiwighteone                 | PPARG    |
| <i>licorice</i> | Lupiwighteone                 | F10      |
| <i>licorice</i> | Lupiwighteone                 | PTGS2    |
| <i>licorice</i> | Lupiwighteone                 | TOP2A    |
| <i>licorice</i> | Lupiwighteone                 | ESR2     |
| <i>licorice</i> | Lupiwighteone                 | DPP4     |
| <i>licorice</i> | Lupiwighteone                 | MAPK14   |
| <i>licorice</i> | Lupiwighteone                 | GSK3B    |
| <i>licorice</i> | Lupiwighteone                 | HSP90AA1 |
| <i>licorice</i> | Lupiwighteone                 | CDK2     |
| <i>licorice</i> | Lupiwighteone                 | CHEK1    |
| <i>licorice</i> | Lupiwighteone                 | PRSS1    |
| <i>licorice</i> | Lupiwighteone                 | PIM1     |
| <i>licorice</i> | Lupiwighteone                 | CCNA2    |
| <i>licorice</i> | Lupiwighteone                 | NCOA2    |
| <i>licorice</i> | Lupiwighteone                 | CALM2    |
| <i>licorice</i> | 7-Methoxy-2-methyl isoflavone | NOS2     |
| <i>licorice</i> | 7-Methoxy-2-methyl isoflavone | PTGS1    |
| <i>licorice</i> | 7-Methoxy-2-methyl isoflavone | DRD1     |
| <i>licorice</i> | 7-Methoxy-2-methyl isoflavone | CHRM3    |
| <i>licorice</i> | 7-Methoxy-2-methyl isoflavone | F2       |
| <i>licorice</i> | 7-Methoxy-2-methyl isoflavone | CHRM1    |
| <i>licorice</i> | 7-Methoxy-2-methyl isoflavone | ESR1     |
| <i>licorice</i> | 7-Methoxy-2-methyl isoflavone | AR       |
| <i>licorice</i> | 7-Methoxy-2-methyl isoflavone | ADRB1    |
| <i>licorice</i> | 7-Methoxy-2-methyl isoflavone | SCN5A    |
| <i>licorice</i> | 7-Methoxy-2-methyl isoflavone | PPARG    |
| <i>licorice</i> | 7-Methoxy-2-methyl isoflavone | PTGS2    |
| <i>licorice</i> | 7-Methoxy-2-methyl isoflavone | RXRA     |
| <i>licorice</i> | 7-Methoxy-2-methyl isoflavone | ACHE     |
| <i>licorice</i> | 7-Methoxy-2-methyl isoflavone | PDE3A    |
| <i>licorice</i> | 7-Methoxy-2-methyl isoflavone | ADRA1B   |
| <i>licorice</i> | 7-Methoxy-2-methyl isoflavone | SLC6A3   |
| <i>licorice</i> | 7-Methoxy-2-methyl isoflavone | ADRB2    |
| <i>licorice</i> | 7-Methoxy-2-methyl isoflavone | ADRA1D   |
| <i>licorice</i> | 7-Methoxy-2-methyl isoflavone | SLC6A4   |
| <i>licorice</i> | 7-Methoxy-2-methyl isoflavone | ESR2     |
| <i>licorice</i> | 7-Methoxy-2-methyl isoflavone | GABRA1   |
| <i>licorice</i> | 7-Methoxy-2-methyl isoflavone | DPP4     |
| <i>licorice</i> | 7-Methoxy-2-methyl isoflavone | MAPK14   |
| <i>licorice</i> | 7-Methoxy-2-methyl isoflavone | GSK3B    |
| <i>licorice</i> | 7-Methoxy-2-methyl isoflavone | HSP90AA1 |
| <i>licorice</i> | 7-Methoxy-2-methyl isoflavone | CDK2     |
| <i>licorice</i> | 7-Methoxy-2-methyl isoflavone | LTA4H    |
| <i>licorice</i> | 7-Methoxy-2-methyl isoflavone | MAOB     |
| <i>licorice</i> | 7-Methoxy-2-methyl isoflavone | CHRNA7   |
| <i>licorice</i> | 7-Methoxy-2-methyl isoflavone | CHEK1    |
| <i>licorice</i> | 7-Methoxy-2-methyl isoflavone | PKIA     |
| <i>licorice</i> | 7-Methoxy-2-methyl isoflavone | PRSS1    |
| <i>licorice</i> | 7-Methoxy-2-methyl isoflavone | PIM1     |



|                 |                               |          |
|-----------------|-------------------------------|----------|
| <i>licorice</i> | 7-Methoxy-2-methyl isoflavone | CCNA2    |
| <i>licorice</i> | 7-Methoxy-2-methyl isoflavone | NCOA1    |
| <i>licorice</i> | 7-Methoxy-2-methyl isoflavone | PKIA     |
| <i>licorice</i> | 7-Methoxy-2-methyl isoflavone | CALM2    |
| <i>licorice</i> | 7-Methoxy-2-methyl isoflavone | CHRM5    |
| <i>licorice</i> | 7-Methoxy-2-methyl isoflavone | NOS3     |
| <i>licorice</i> | 7-Methoxy-2-methyl isoflavone | OPRM1    |
| <i>licorice</i> | 7-Methoxy-2-methyl isoflavone | NCOA2    |
| <i>licorice</i> | naringenin                    | PTGS1    |
| <i>licorice</i> | naringenin                    | ESR1     |
| <i>licorice</i> | naringenin                    | PTGS2    |
| <i>licorice</i> | naringenin                    | HSP90AA1 |
| <i>licorice</i> | naringenin                    | LACTBL1  |
| <i>licorice</i> | naringenin                    | PKIA     |
| <i>licorice</i> | naringenin                    | PIK3CG   |
| <i>licorice</i> | naringenin                    | RELA     |
| <i>licorice</i> | naringenin                    | AKT1     |
| <i>licorice</i> | naringenin                    | BCL2     |
| <i>licorice</i> | naringenin                    | MAPK3    |
| <i>licorice</i> | naringenin                    | MAPK1    |
| <i>licorice</i> | naringenin                    | CASP3    |
| <i>licorice</i> | naringenin                    | FASN     |
| <i>licorice</i> | naringenin                    | LDLR     |
| <i>licorice</i> | naringenin                    | BAD      |
| <i>licorice</i> | naringenin                    | SOD1     |
| <i>licorice</i> | naringenin                    | PPARG    |
| <i>licorice</i> | naringenin                    | MTTP     |
| <i>licorice</i> | naringenin                    | APOB     |
| <i>licorice</i> | naringenin                    | PLB1     |
| <i>licorice</i> | naringenin                    | HMGCR    |
| <i>licorice</i> | naringenin                    | CYP19A1  |
| <i>licorice</i> | naringenin                    | UGT1A8   |
| <i>licorice</i> | naringenin                    | PPARA    |
| <i>licorice</i> | naringenin                    | SREBF1   |
| <i>licorice</i> | naringenin                    | GSR      |
| <i>licorice</i> | naringenin                    | ABCC1    |
| <i>licorice</i> | naringenin                    | ADIPOQ   |
| <i>licorice</i> | naringenin                    | SOAT2    |
| <i>licorice</i> | naringenin                    | AKR1C1   |
| <i>licorice</i> | naringenin                    | GOT1     |
| <i>licorice</i> | naringenin                    | ABAT     |
| <i>licorice</i> | naringenin                    | CES1     |
| <i>licorice</i> | naringenin                    | SOAT1    |
| <i>licorice</i> | glyasperin B                  | NOS2     |
| <i>licorice</i> | glyasperin B                  | F2       |
| <i>licorice</i> | glyasperin B                  | ESR1     |
| <i>licorice</i> | glyasperin B                  | AR       |
| <i>licorice</i> | glyasperin B                  | PPARG    |
| <i>licorice</i> | glyasperin B                  | F10      |
| <i>licorice</i> | glyasperin B                  | PTGS2    |
| <i>licorice</i> | glyasperin B                  | F7       |
| <i>licorice</i> | glyasperin B                  | KDR      |
| <i>licorice</i> | glyasperin B                  | ACHE     |
| <i>licorice</i> | glyasperin B                  | TOP2A    |
| <i>licorice</i> | glyasperin B                  | ESR2     |
| <i>licorice</i> | glyasperin B                  | DPP4     |
| <i>licorice</i> | glyasperin B                  | GSK3B    |
| <i>licorice</i> | glyasperin B                  | HSP90AA1 |

|                 |                                           |          |
|-----------------|-------------------------------------------|----------|
| <i>licorice</i> | glyasperin B                              | CDK2     |
| <i>licorice</i> | glyasperin B                              | PRSS1    |
| <i>licorice</i> | glyasperin B                              | PIM1     |
| <i>licorice</i> | glyasperin B                              | CCNA2    |
| <i>licorice</i> | glyasperin B                              | NCOA2    |
| <i>licorice</i> | glyasperin B                              | CALM2    |
| <i>licorice</i> | glyasperin F                              | NOS2     |
| <i>licorice</i> | glyasperin F                              | PTGS1    |
| <i>licorice</i> | glyasperin F                              | ESR1     |
| <i>licorice</i> | glyasperin F                              | AR       |
| <i>licorice</i> | glyasperin F                              | SCN5A    |
| <i>licorice</i> | glyasperin F                              | PPARG    |
| <i>licorice</i> | glyasperin F                              | F10      |
| <i>licorice</i> | glyasperin F                              | PTGS2    |
| <i>licorice</i> | glyasperin F                              | TOP2A    |
| <i>licorice</i> | glyasperin F                              | ESR2     |
| <i>licorice</i> | glyasperin F                              | MAPK14   |
| <i>licorice</i> | glyasperin F                              | GSK3B    |
| <i>licorice</i> | glyasperin F                              | HSP90AA1 |
| <i>licorice</i> | glyasperin F                              | CDK2     |
| <i>licorice</i> | glyasperin F                              | PRSS1    |
| <i>licorice</i> | glyasperin F                              | PIM1     |
| <i>licorice</i> | glyasperin F                              | CCNA2    |
| <i>licorice</i> | glyasperin F                              | CALM2    |
| <i>licorice</i> | Isotrifoliol                              | NOS2     |
| <i>licorice</i> | Isotrifoliol                              | ESR1     |
| <i>licorice</i> | Isotrifoliol                              | AR       |
| <i>licorice</i> | Isotrifoliol                              | PTGS2    |
| <i>licorice</i> | Isotrifoliol                              | ESR2     |
| <i>licorice</i> | Isotrifoliol                              | MAPK14   |
| <i>licorice</i> | Isotrifoliol                              | GSK3B    |
| <i>licorice</i> | Isotrifoliol                              | HSP90AA1 |
| <i>licorice</i> | Isotrifoliol                              | CDK2     |
| <i>licorice</i> | Isotrifoliol                              | PIK3CG   |
| <i>licorice</i> | Isotrifoliol                              | CHEK1    |
| <i>licorice</i> | Isotrifoliol                              | PKIA     |
| <i>licorice</i> | Isotrifoliol                              | PIM1     |
| <i>licorice</i> | Isotrifoliol                              | CCNA2    |
| <i>licorice</i> | (E)-1-(2,4-dihydroxyphenyl)-3-(2,2-dimeth | NOS2     |
| <i>licorice</i> | (E)-1-(2,4-dihydroxyphenyl)-3-(2,2-dimeth | PTGS1    |
| <i>licorice</i> | (E)-1-(2,4-dihydroxyphenyl)-3-(2,2-dimeth | ESR1     |
| <i>licorice</i> | (E)-1-(2,4-dihydroxyphenyl)-3-(2,2-dimeth | AR       |
| <i>licorice</i> | (E)-1-(2,4-dihydroxyphenyl)-3-(2,2-dimeth | SCN5A    |
| <i>licorice</i> | (E)-1-(2,4-dihydroxyphenyl)-3-(2,2-dimeth | PPARG    |
| <i>licorice</i> | (E)-1-(2,4-dihydroxyphenyl)-3-(2,2-dimeth | F10      |
| <i>licorice</i> | (E)-1-(2,4-dihydroxyphenyl)-3-(2,2-dimeth | PTGS2    |
| <i>licorice</i> | (E)-1-(2,4-dihydroxyphenyl)-3-(2,2-dimeth | CA2      |
| <i>licorice</i> | (E)-1-(2,4-dihydroxyphenyl)-3-(2,2-dimeth | RXRA     |
| <i>licorice</i> | (E)-1-(2,4-dihydroxyphenyl)-3-(2,2-dimeth | ADRA1B   |
| <i>licorice</i> | (E)-1-(2,4-dihydroxyphenyl)-3-(2,2-dimeth | ESR2     |
| <i>licorice</i> | (E)-1-(2,4-dihydroxyphenyl)-3-(2,2-dimeth | MAPK14   |
| <i>licorice</i> | (E)-1-(2,4-dihydroxyphenyl)-3-(2,2-dimeth | GSK3B    |
| <i>licorice</i> | (E)-1-(2,4-dihydroxyphenyl)-3-(2,2-dimeth | CDK2     |
| <i>licorice</i> | (E)-1-(2,4-dihydroxyphenyl)-3-(2,2-dimeth | CHEK1    |
| <i>licorice</i> | (E)-1-(2,4-dihydroxyphenyl)-3-(2,2-dimeth | PIM1     |
| <i>licorice</i> | (E)-1-(2,4-dihydroxyphenyl)-3-(2,2-dimeth | CCNA2    |
| <i>licorice</i> | (E)-1-(2,4-dihydroxyphenyl)-3-(2,2-dimeth | NCOA2    |
| <i>licorice</i> | (E)-1-(2,4-dihydroxyphenyl)-3-(2,2-dimeth | CALM2    |

|                 |                                           |          |
|-----------------|-------------------------------------------|----------|
| <i>licorice</i> | (2S)-6-(2,4-dihydroxyphenyl)-2-(2-hydroxy | NOS2     |
| <i>licorice</i> | (2S)-6-(2,4-dihydroxyphenyl)-2-(2-hydroxy | F2       |
| <i>licorice</i> | (2S)-6-(2,4-dihydroxyphenyl)-2-(2-hydroxy | ESR1     |
| <i>licorice</i> | (2S)-6-(2,4-dihydroxyphenyl)-2-(2-hydroxy | AR       |
| <i>licorice</i> | (2S)-6-(2,4-dihydroxyphenyl)-2-(2-hydroxy | PPARG    |
| <i>licorice</i> | (2S)-6-(2,4-dihydroxyphenyl)-2-(2-hydroxy | F10      |
| <i>licorice</i> | (2S)-6-(2,4-dihydroxyphenyl)-2-(2-hydroxy | PTGS2    |
| <i>licorice</i> | (2S)-6-(2,4-dihydroxyphenyl)-2-(2-hydroxy | F7       |
| <i>licorice</i> | (2S)-6-(2,4-dihydroxyphenyl)-2-(2-hydroxy | KDR      |
| <i>licorice</i> | (2S)-6-(2,4-dihydroxyphenyl)-2-(2-hydroxy | ACHE     |
| <i>licorice</i> | (2S)-6-(2,4-dihydroxyphenyl)-2-(2-hydroxy | TOP2A    |
| <i>licorice</i> | (2S)-6-(2,4-dihydroxyphenyl)-2-(2-hydroxy | ESR2     |
| <i>licorice</i> | (2S)-6-(2,4-dihydroxyphenyl)-2-(2-hydroxy | DPP4     |
| <i>licorice</i> | (2S)-6-(2,4-dihydroxyphenyl)-2-(2-hydroxy | MAPK14   |
| <i>licorice</i> | (2S)-6-(2,4-dihydroxyphenyl)-2-(2-hydroxy | GSK3B    |
| <i>licorice</i> | (2S)-6-(2,4-dihydroxyphenyl)-2-(2-hydroxy | CDK2     |
| <i>licorice</i> | (2S)-6-(2,4-dihydroxyphenyl)-2-(2-hydroxy | CHEK1    |
| <i>licorice</i> | (2S)-6-(2,4-dihydroxyphenyl)-2-(2-hydroxy | PRSS1    |
| <i>licorice</i> | (2S)-6-(2,4-dihydroxyphenyl)-2-(2-hydroxy | PIM1     |
| <i>licorice</i> | (2S)-6-(2,4-dihydroxyphenyl)-2-(2-hydroxy | CCNA2    |
| <i>licorice</i> | (2S)-6-(2,4-dihydroxyphenyl)-2-(2-hydroxy | CALM2    |
| <i>licorice</i> | Semilicoisoflavone B                      | NOS2     |
| <i>licorice</i> | Semilicoisoflavone B                      | F2       |
| <i>licorice</i> | Semilicoisoflavone B                      | ESR1     |
| <i>licorice</i> | Semilicoisoflavone B                      | AR       |
| <i>licorice</i> | Semilicoisoflavone B                      | SCN5A    |
| <i>licorice</i> | Semilicoisoflavone B                      | PPARG    |
| <i>licorice</i> | Semilicoisoflavone B                      | F10      |
| <i>licorice</i> | Semilicoisoflavone B                      | PTGS2    |
| <i>licorice</i> | Semilicoisoflavone B                      | F7       |
| <i>licorice</i> | Semilicoisoflavone B                      | ACHE     |
| <i>licorice</i> | Semilicoisoflavone B                      | TOP2A    |
| <i>licorice</i> | Semilicoisoflavone B                      | GSK3B    |
| <i>licorice</i> | Semilicoisoflavone B                      | HSP90AA1 |
| <i>licorice</i> | Semilicoisoflavone B                      | CDK2     |
| <i>licorice</i> | Semilicoisoflavone B                      | CHEK1    |
| <i>licorice</i> | Semilicoisoflavone B                      | PRSS1    |
| <i>licorice</i> | Semilicoisoflavone B                      | CALM2    |
| <i>licorice</i> | Glepidotin A                              | NOS2     |
| <i>licorice</i> | Glepidotin A                              | PTGS1    |
| <i>licorice</i> | Glepidotin A                              | F2       |
| <i>licorice</i> | Glepidotin A                              | ESR1     |
| <i>licorice</i> | Glepidotin A                              | AR       |
| <i>licorice</i> | Glepidotin A                              | SCN5A    |
| <i>licorice</i> | Glepidotin A                              | PPARG    |
| <i>licorice</i> | Glepidotin A                              | F10      |
| <i>licorice</i> | Glepidotin A                              | PTGS2    |
| <i>licorice</i> | Glepidotin A                              | NOS3     |
| <i>licorice</i> | Glepidotin A                              | F7       |
| <i>licorice</i> | Glepidotin A                              | KDR      |
| <i>licorice</i> | Glepidotin A                              | RXRA     |
| <i>licorice</i> | Glepidotin A                              | PDE3A    |
| <i>licorice</i> | Glepidotin A                              | TOP2A    |
| <i>licorice</i> | Glepidotin A                              | DPP4     |
| <i>licorice</i> | Glepidotin A                              | MAPK14   |
| <i>licorice</i> | Glepidotin A                              | GSK3B    |
| <i>licorice</i> | Glepidotin A                              | HSP90AA1 |
| <i>licorice</i> | Glepidotin A                              | CDK2     |

|                 |                                           |          |
|-----------------|-------------------------------------------|----------|
| <i>licorice</i> | Glepidotin A                              | CHEK1    |
| <i>licorice</i> | Glepidotin A                              | PRSS1    |
| <i>licorice</i> | Glepidotin A                              | PIM1     |
| <i>licorice</i> | Glepidotin A                              | CCNA2    |
| <i>licorice</i> | Glepidotin A                              | CALM2    |
| <i>licorice</i> | Glepidotin B                              | PTGS1    |
| <i>licorice</i> | Glepidotin B                              | ESR1     |
| <i>licorice</i> | Glepidotin B                              | SCN5A    |
| <i>licorice</i> | Glepidotin B                              | F10      |
| <i>licorice</i> | Glepidotin B                              | PTGS2    |
| <i>licorice</i> | Glepidotin B                              | NOS3     |
| <i>licorice</i> | Glepidotin B                              | F7       |
| <i>licorice</i> | Glepidotin B                              | RXRA     |
| <i>licorice</i> | Glepidotin B                              | PDE3A    |
| <i>licorice</i> | Glepidotin B                              | ADRA1B   |
| <i>licorice</i> | Glepidotin B                              | TOP2A    |
| <i>licorice</i> | Glepidotin B                              | HSP90AA1 |
| <i>licorice</i> | Glepidotin B                              | NCOA1    |
| <i>licorice</i> | Glepidotin B                              | CALM2    |
| <i>licorice</i> | Glypallichalcone                          | NOS2     |
| <i>licorice</i> | Glypallichalcone                          | PTGS1    |
| <i>licorice</i> | Glypallichalcone                          | CHRM1    |
| <i>licorice</i> | Glypallichalcone                          | ESR1     |
| <i>licorice</i> | Glypallichalcone                          | AR       |
| <i>licorice</i> | Glypallichalcone                          | SCN5A    |
| <i>licorice</i> | Glypallichalcone                          | PPARG    |
| <i>licorice</i> | Glypallichalcone                          | PTGS2    |
| <i>licorice</i> | Glypallichalcone                          | CA2      |
| <i>licorice</i> | Glypallichalcone                          | PDE3A    |
| <i>licorice</i> | Glypallichalcone                          | ADRA1B   |
| <i>licorice</i> | Glypallichalcone                          | SLC6A3   |
| <i>licorice</i> | Glypallichalcone                          | ADRB2    |
| <i>licorice</i> | Glypallichalcone                          | SLC6A4   |
| <i>licorice</i> | Glypallichalcone                          | ESR2     |
| <i>licorice</i> | Glypallichalcone                          | MAPK14   |
| <i>licorice</i> | Glypallichalcone                          | GSK3B    |
| <i>licorice</i> | Glypallichalcone                          | HSP90AA1 |
| <i>licorice</i> | Glypallichalcone                          | CDK2     |
| <i>licorice</i> | Glypallichalcone                          | LTA4H    |
| <i>licorice</i> | Glypallichalcone                          | MAOB     |
| <i>licorice</i> | Glypallichalcone                          | CHEK1    |
| <i>licorice</i> | Glypallichalcone                          | PKIA     |
| <i>licorice</i> | Glypallichalcone                          | CCNA2    |
| <i>licorice</i> | Glypallichalcone                          | NCOA1    |
| <i>licorice</i> | Glypallichalcone                          | PKIA     |
| <i>licorice</i> | Glypallichalcone                          | CALM2    |
| <i>licorice</i> | 8-(6-hydroxy-2-benzofuranyl)-2,2-dimethyl | NOS2     |
| <i>licorice</i> | 8-(6-hydroxy-2-benzofuranyl)-2,2-dimethyl | ESR1     |
| <i>licorice</i> | 8-(6-hydroxy-2-benzofuranyl)-2,2-dimethyl | PTGS2    |
| <i>licorice</i> | 8-(6-hydroxy-2-benzofuranyl)-2,2-dimethyl | RXRA     |
| <i>licorice</i> | 8-(6-hydroxy-2-benzofuranyl)-2,2-dimethyl | HSP90AA1 |
| <i>licorice</i> | 8-(6-hydroxy-2-benzofuranyl)-2,2-dimethyl | PIK3CG   |
| <i>licorice</i> | Licochalcone B                            | NOS2     |
| <i>licorice</i> | Licochalcone B                            | PTGS1    |
| <i>licorice</i> | Licochalcone B                            | ESR1     |
| <i>licorice</i> | Licochalcone B                            | AR       |
| <i>licorice</i> | Licochalcone B                            | PPARG    |
| <i>licorice</i> | Licochalcone B                            | PTGS2    |

|                 |                |          |
|-----------------|----------------|----------|
| <i>licorice</i> | Licochalcone B | CA2      |
| <i>licorice</i> | Licochalcone B | PDE3A    |
| <i>licorice</i> | Licochalcone B | ADRB2    |
| <i>licorice</i> | Licochalcone B | ESR2     |
| <i>licorice</i> | Licochalcone B | MAPK14   |
| <i>licorice</i> | Licochalcone B | GSK3B    |
| <i>licorice</i> | Licochalcone B | HSP90AA1 |
| <i>licorice</i> | Licochalcone B | CDK2     |
| <i>licorice</i> | Licochalcone B | CHEK1    |
| <i>licorice</i> | Licochalcone B | PKIA     |
| <i>licorice</i> | Licochalcone B | PIM1     |
| <i>licorice</i> | Licochalcone B | CCNA2    |
| <i>licorice</i> | Licochalcone B | CALM2    |
| <i>licorice</i> | licochalcone G | NOS2     |
| <i>licorice</i> | licochalcone G | ESR1     |
| <i>licorice</i> | licochalcone G | AR       |
| <i>licorice</i> | licochalcone G | PPARG    |
| <i>licorice</i> | licochalcone G | F10      |
| <i>licorice</i> | licochalcone G | PTGS2    |
| <i>licorice</i> | licochalcone G | KDR      |
| <i>licorice</i> | licochalcone G | ESR2     |
| <i>licorice</i> | licochalcone G | MAPK14   |
| <i>licorice</i> | licochalcone G | GSK3B    |
| <i>licorice</i> | licochalcone G | HSP90AA1 |
| <i>licorice</i> | licochalcone G | CDK2     |
| <i>licorice</i> | licochalcone G | PIM1     |
| <i>licorice</i> | licochalcone G | CCNA2    |
| <i>licorice</i> | licochalcone G | NCOA2    |
| <i>licorice</i> | licochalcone G | CALM2    |
| <i>licorice</i> | Licoricone     | NOS2     |
| <i>licorice</i> | Licoricone     | F2       |
| <i>licorice</i> | Licoricone     | KCNH2    |
| <i>licorice</i> | Licoricone     | ESR1     |
| <i>licorice</i> | Licoricone     | AR       |
| <i>licorice</i> | Licoricone     | PPARG    |
| <i>licorice</i> | Licoricone     | F10      |
| <i>licorice</i> | Licoricone     | PTGS2    |
| <i>licorice</i> | Licoricone     | KDR      |
| <i>licorice</i> | Licoricone     | TOP2A    |
| <i>licorice</i> | Licoricone     | CHEK1    |
| <i>licorice</i> | Licoricone     | PRSS1    |
| <i>licorice</i> | Licoricone     | PIM1     |
| <i>licorice</i> | Licoricone     | NCOA2    |
| <i>licorice</i> | Licoricone     | CALM2    |
| <i>licorice</i> | Gancaonin A    | NOS2     |
| <i>licorice</i> | Gancaonin A    | F2       |
| <i>licorice</i> | Gancaonin A    | ESR1     |
| <i>licorice</i> | Gancaonin A    | AR       |
| <i>licorice</i> | Gancaonin A    | SCN5A    |
| <i>licorice</i> | Gancaonin A    | PPARG    |
| <i>licorice</i> | Gancaonin A    | F10      |
| <i>licorice</i> | Gancaonin A    | PTGS2    |
| <i>licorice</i> | Gancaonin A    | ACHE     |
| <i>licorice</i> | Gancaonin A    | TOP2A    |
| <i>licorice</i> | Gancaonin A    | ESR2     |
| <i>licorice</i> | Gancaonin A    | DPP4     |
| <i>licorice</i> | Gancaonin A    | GSK3B    |
| <i>licorice</i> | Gancaonin A    | HSP90AA1 |

|                 |                                                                                                               |          |
|-----------------|---------------------------------------------------------------------------------------------------------------|----------|
| <i>licorice</i> | Gancaonin A                                                                                                   | CHEK1    |
| <i>licorice</i> | Gancaonin A                                                                                                   | PRSS1    |
| <i>licorice</i> | Gancaonin A                                                                                                   | PIM1     |
| <i>licorice</i> | Gancaonin A                                                                                                   | CCNA2    |
| <i>licorice</i> | Gancaonin A                                                                                                   | NCOA2    |
| <i>licorice</i> | Gancaonin A                                                                                                   | CALM2    |
| <i>licorice</i> | Gancaonin B                                                                                                   | NOS2     |
| <i>licorice</i> | Gancaonin B                                                                                                   | F2       |
| <i>licorice</i> | Gancaonin B                                                                                                   | ESR1     |
| <i>licorice</i> | Gancaonin B                                                                                                   | AR       |
| <i>licorice</i> | Gancaonin B                                                                                                   | PPARG    |
| <i>licorice</i> | Gancaonin B                                                                                                   | F10      |
| <i>licorice</i> | Gancaonin B                                                                                                   | PTGS2    |
| <i>licorice</i> | Gancaonin B                                                                                                   | F7       |
| <i>licorice</i> | Gancaonin B                                                                                                   | KDR      |
| <i>licorice</i> | Gancaonin B                                                                                                   | ADRA1B   |
| <i>licorice</i> | Gancaonin B                                                                                                   | ADRB2    |
| <i>licorice</i> | Gancaonin B                                                                                                   | TOP2A    |
| <i>licorice</i> | Gancaonin B                                                                                                   | ESR2     |
| <i>licorice</i> | Gancaonin B                                                                                                   | DPP4     |
| <i>licorice</i> | Gancaonin B                                                                                                   | GSK3B    |
| <i>licorice</i> | Gancaonin B                                                                                                   | HSP90AA1 |
| <i>licorice</i> | Gancaonin B                                                                                                   | CHEK1    |
| <i>licorice</i> | Gancaonin B                                                                                                   | PRSS1    |
| <i>licorice</i> | Gancaonin B                                                                                                   | PIM1     |
| <i>licorice</i> | Gancaonin B                                                                                                   | CCNA2    |
| <i>licorice</i> | Gancaonin B                                                                                                   | NCOA2    |
| <i>licorice</i> | Gancaonin B                                                                                                   | CALM2    |
| <i>licorice</i> | 3-(3,4-dihydroxyphenyl)-5,7-dihydroxy-8-(4-methoxyphenyl)-8-methoxy-6-methyl-2,3,4,5-tetrahydro-1H-benzofuran | NOS2     |
| <i>licorice</i> | 3-(3,4-dihydroxyphenyl)-5,7-dihydroxy-8-(4-methoxyphenyl)-8-methoxy-6-methyl-2,3,4,5-tetrahydro-1H-benzofuran | F2       |
| <i>licorice</i> | 3-(3,4-dihydroxyphenyl)-5,7-dihydroxy-8-(4-methoxyphenyl)-8-methoxy-6-methyl-2,3,4,5-tetrahydro-1H-benzofuran | ESR1     |
| <i>licorice</i> | 3-(3,4-dihydroxyphenyl)-5,7-dihydroxy-8-(4-methoxyphenyl)-8-methoxy-6-methyl-2,3,4,5-tetrahydro-1H-benzofuran | AR       |
| <i>licorice</i> | 3-(3,4-dihydroxyphenyl)-5,7-dihydroxy-8-(4-methoxyphenyl)-8-methoxy-6-methyl-2,3,4,5-tetrahydro-1H-benzofuran | PPARG    |
| <i>licorice</i> | 3-(3,4-dihydroxyphenyl)-5,7-dihydroxy-8-(4-methoxyphenyl)-8-methoxy-6-methyl-2,3,4,5-tetrahydro-1H-benzofuran | F10      |
| <i>licorice</i> | 3-(3,4-dihydroxyphenyl)-5,7-dihydroxy-8-(4-methoxyphenyl)-8-methoxy-6-methyl-2,3,4,5-tetrahydro-1H-benzofuran | PTGS2    |
| <i>licorice</i> | 3-(3,4-dihydroxyphenyl)-5,7-dihydroxy-8-(4-methoxyphenyl)-8-methoxy-6-methyl-2,3,4,5-tetrahydro-1H-benzofuran | PTPN1    |
| <i>licorice</i> | 3-(3,4-dihydroxyphenyl)-5,7-dihydroxy-8-(4-methoxyphenyl)-8-methoxy-6-methyl-2,3,4,5-tetrahydro-1H-benzofuran | MAPK14   |
| <i>licorice</i> | 3-(3,4-dihydroxyphenyl)-5,7-dihydroxy-8-(4-methoxyphenyl)-8-methoxy-6-methyl-2,3,4,5-tetrahydro-1H-benzofuran | GSK3B    |
| <i>licorice</i> | 3-(3,4-dihydroxyphenyl)-5,7-dihydroxy-8-(4-methoxyphenyl)-8-methoxy-6-methyl-2,3,4,5-tetrahydro-1H-benzofuran | HSP90AA1 |
| <i>licorice</i> | 3-(3,4-dihydroxyphenyl)-5,7-dihydroxy-8-(4-methoxyphenyl)-8-methoxy-6-methyl-2,3,4,5-tetrahydro-1H-benzofuran | CDK2     |
| <i>licorice</i> | 3-(3,4-dihydroxyphenyl)-5,7-dihydroxy-8-(4-methoxyphenyl)-8-methoxy-6-methyl-2,3,4,5-tetrahydro-1H-benzofuran | CHEK1    |
| <i>licorice</i> | 3-(3,4-dihydroxyphenyl)-5,7-dihydroxy-8-(4-methoxyphenyl)-8-methoxy-6-methyl-2,3,4,5-tetrahydro-1H-benzofuran | PRSS1    |
| <i>licorice</i> | 3-(3,4-dihydroxyphenyl)-5,7-dihydroxy-8-(4-methoxyphenyl)-8-methoxy-6-methyl-2,3,4,5-tetrahydro-1H-benzofuran | PIM1     |
| <i>licorice</i> | 3-(3,4-dihydroxyphenyl)-5,7-dihydroxy-8-(4-methoxyphenyl)-8-methoxy-6-methyl-2,3,4,5-tetrahydro-1H-benzofuran | CCNA2    |
| <i>licorice</i> | 3-(3,4-dihydroxyphenyl)-5,7-dihydroxy-8-(4-methoxyphenyl)-8-methoxy-6-methyl-2,3,4,5-tetrahydro-1H-benzofuran | NCOA2    |
| <i>licorice</i> | 3-(3,4-dihydroxyphenyl)-5,7-dihydroxy-8-(4-methoxyphenyl)-8-methoxy-6-methyl-2,3,4,5-tetrahydro-1H-benzofuran | CALM2    |
| <i>licorice</i> | 5,7-dihydroxy-3-(4-methoxyphenyl)-8-(3-methoxyphenyl)-6-methyl-2,3,4,5-tetrahydro-1H-benzofuran               | NOS2     |
| <i>licorice</i> | 5,7-dihydroxy-3-(4-methoxyphenyl)-8-(3-methoxyphenyl)-6-methyl-2,3,4,5-tetrahydro-1H-benzofuran               | KCNH2    |
| <i>licorice</i> | 5,7-dihydroxy-3-(4-methoxyphenyl)-8-(3-methoxyphenyl)-6-methyl-2,3,4,5-tetrahydro-1H-benzofuran               | ESR1     |
| <i>licorice</i> | 5,7-dihydroxy-3-(4-methoxyphenyl)-8-(3-methoxyphenyl)-6-methyl-2,3,4,5-tetrahydro-1H-benzofuran               | AR       |
| <i>licorice</i> | 5,7-dihydroxy-3-(4-methoxyphenyl)-8-(3-methoxyphenyl)-6-methyl-2,3,4,5-tetrahydro-1H-benzofuran               | PPARG    |
| <i>licorice</i> | 5,7-dihydroxy-3-(4-methoxyphenyl)-8-(3-methoxyphenyl)-6-methyl-2,3,4,5-tetrahydro-1H-benzofuran               | F10      |
| <i>licorice</i> | 5,7-dihydroxy-3-(4-methoxyphenyl)-8-(3-methoxyphenyl)-6-methyl-2,3,4,5-tetrahydro-1H-benzofuran               | PTGS2    |
| <i>licorice</i> | 5,7-dihydroxy-3-(4-methoxyphenyl)-8-(3-methoxyphenyl)-6-methyl-2,3,4,5-tetrahydro-1H-benzofuran               | TOP2A    |
| <i>licorice</i> | 5,7-dihydroxy-3-(4-methoxyphenyl)-8-(3-methoxyphenyl)-6-methyl-2,3,4,5-tetrahydro-1H-benzofuran               | ESR2     |
| <i>licorice</i> | 5,7-dihydroxy-3-(4-methoxyphenyl)-8-(3-methoxyphenyl)-6-methyl-2,3,4,5-tetrahydro-1H-benzofuran               | DPP4     |
| <i>licorice</i> | 5,7-dihydroxy-3-(4-methoxyphenyl)-8-(3-methoxyphenyl)-6-methyl-2,3,4,5-tetrahydro-1H-benzofuran               | MAPK14   |
| <i>licorice</i> | 5,7-dihydroxy-3-(4-methoxyphenyl)-8-(3-methoxyphenyl)-6-methyl-2,3,4,5-tetrahydro-1H-benzofuran               | GSK3B    |

|                 |                                           |          |
|-----------------|-------------------------------------------|----------|
| <i>licorice</i> | 5,7-dihydroxy-3-(4-methoxyphenyl)-8-(3-m  | HSP90AA1 |
| <i>licorice</i> | 5,7-dihydroxy-3-(4-methoxyphenyl)-8-(3-m  | CDK2     |
| <i>licorice</i> | 5,7-dihydroxy-3-(4-methoxyphenyl)-8-(3-m  | CHEK1    |
| <i>licorice</i> | 5,7-dihydroxy-3-(4-methoxyphenyl)-8-(3-m  | PRSS1    |
| <i>licorice</i> | 5,7-dihydroxy-3-(4-methoxyphenyl)-8-(3-m  | PIM1     |
| <i>licorice</i> | 5,7-dihydroxy-3-(4-methoxyphenyl)-8-(3-m  | CCNA2    |
| <i>licorice</i> | 5,7-dihydroxy-3-(4-methoxyphenyl)-8-(3-m  | NCOA2    |
| <i>licorice</i> | 5,7-dihydroxy-3-(4-methoxyphenyl)-8-(3-m  | CALM2    |
| <i>licorice</i> | 2-(3,4-dihydroxyphenyl)-5,7-dihydroxy-6-( | F2       |
| <i>licorice</i> | 2-(3,4-dihydroxyphenyl)-5,7-dihydroxy-6-( | AR       |
| <i>licorice</i> | 2-(3,4-dihydroxyphenyl)-5,7-dihydroxy-6-( | SCN5A    |
| <i>licorice</i> | 2-(3,4-dihydroxyphenyl)-5,7-dihydroxy-6-( | PPARG    |
| <i>licorice</i> | 2-(3,4-dihydroxyphenyl)-5,7-dihydroxy-6-( | F10      |
| <i>licorice</i> | 2-(3,4-dihydroxyphenyl)-5,7-dihydroxy-6-( | PTGS2    |
| <i>licorice</i> | 2-(3,4-dihydroxyphenyl)-5,7-dihydroxy-6-( | F7       |
| <i>licorice</i> | 2-(3,4-dihydroxyphenyl)-5,7-dihydroxy-6-( | ADRB2    |
| <i>licorice</i> | 2-(3,4-dihydroxyphenyl)-5,7-dihydroxy-6-( | DPP4     |
| <i>licorice</i> | 2-(3,4-dihydroxyphenyl)-5,7-dihydroxy-6-( | HSP90AA1 |
| <i>licorice</i> | 2-(3,4-dihydroxyphenyl)-5,7-dihydroxy-6-( | CDK2     |
| <i>licorice</i> | 2-(3,4-dihydroxyphenyl)-5,7-dihydroxy-6-( | CHEK1    |
| <i>licorice</i> | 2-(3,4-dihydroxyphenyl)-5,7-dihydroxy-6-( | PRSS1    |
| <i>licorice</i> | 2-(3,4-dihydroxyphenyl)-5,7-dihydroxy-6-( | PIM1     |
| <i>licorice</i> | 2-(3,4-dihydroxyphenyl)-5,7-dihydroxy-6-( | CCNA2    |
| <i>licorice</i> | 2-(3,4-dihydroxyphenyl)-5,7-dihydroxy-6-( | CALM2    |
| <i>licorice</i> | Licocoumarone                             | ESR1     |
| <i>licorice</i> | Licocoumarone                             | AR       |
| <i>licorice</i> | Licocoumarone                             | ESR2     |
| <i>licorice</i> | Licocoumarone                             | GSK3B    |
| <i>licorice</i> | Licocoumarone                             | HSP90AA1 |
| <i>licorice</i> | Licocoumarone                             | CDK2     |
| <i>licorice</i> | Licocoumarone                             | CCNA2    |
| <i>licorice</i> | Licoisoflavone                            | NOS2     |
| <i>licorice</i> | Licoisoflavone                            | F2       |
| <i>licorice</i> | Licoisoflavone                            | ESR1     |
| <i>licorice</i> | Licoisoflavone                            | AR       |
| <i>licorice</i> | Licoisoflavone                            | PPARG    |
| <i>licorice</i> | Licoisoflavone                            | F10      |
| <i>licorice</i> | Licoisoflavone                            | PTGS2    |
| <i>licorice</i> | Licoisoflavone                            | KDR      |
| <i>licorice</i> | Licoisoflavone                            | TOP2A    |
| <i>licorice</i> | Licoisoflavone                            | DPP4     |
| <i>licorice</i> | Licoisoflavone                            | MAPK14   |
| <i>licorice</i> | Licoisoflavone                            | HSP90AA1 |
| <i>licorice</i> | Licoisoflavone                            | CDK2     |
| <i>licorice</i> | Licoisoflavone                            | CHEK1    |
| <i>licorice</i> | Licoisoflavone                            | PRSS1    |
| <i>licorice</i> | Licoisoflavone                            | PIM1     |
| <i>licorice</i> | Licoisoflavone                            | CCNA2    |
| <i>licorice</i> | Licoisoflavone                            | NCOA2    |
| <i>licorice</i> | Licoisoflavone                            | CALM2    |
| <i>licorice</i> | Licoisoflavone B                          | NOS2     |
| <i>licorice</i> | Licoisoflavone B                          | F2       |
| <i>licorice</i> | Licoisoflavone B                          | ESR1     |
| <i>licorice</i> | Licoisoflavone B                          | AR       |
| <i>licorice</i> | Licoisoflavone B                          | PPARG    |
| <i>licorice</i> | Licoisoflavone B                          | F10      |
| <i>licorice</i> | Licoisoflavone B                          | PTGS2    |
| <i>licorice</i> | Licoisoflavone B                          | ACHE     |

|                 |                                            |          |
|-----------------|--------------------------------------------|----------|
| <i>licorice</i> | Licoisoflavone B                           | TOP2A    |
| <i>licorice</i> | Licoisoflavone B                           | ESR2     |
| <i>licorice</i> | Licoisoflavone B                           | GSK3B    |
| <i>licorice</i> | Licoisoflavone B                           | CDK2     |
| <i>licorice</i> | Licoisoflavone B                           | CHEK1    |
| <i>licorice</i> | Licoisoflavone B                           | PRSS1    |
| <i>licorice</i> | Licoisoflavone B                           | PIM1     |
| <i>licorice</i> | Licoisoflavone B                           | CCNA2    |
| <i>licorice</i> | Licoisoflavone B                           | CALM2    |
| <i>licorice</i> | licoisoflavanone                           | NOS2     |
| <i>licorice</i> | licoisoflavanone                           | PTGS1    |
| <i>licorice</i> | licoisoflavanone                           | ESR1     |
| <i>licorice</i> | licoisoflavanone                           | AR       |
| <i>licorice</i> | licoisoflavanone                           | SCN5A    |
| <i>licorice</i> | licoisoflavanone                           | PPARG    |
| <i>licorice</i> | licoisoflavanone                           | F10      |
| <i>licorice</i> | licoisoflavanone                           | PTGS2    |
| <i>licorice</i> | licoisoflavanone                           | F7       |
| <i>licorice</i> | licoisoflavanone                           | ACHE     |
| <i>licorice</i> | licoisoflavanone                           | TOP2A    |
| <i>licorice</i> | licoisoflavanone                           | ESR2     |
| <i>licorice</i> | licoisoflavanone                           | GSK3B    |
| <i>licorice</i> | licoisoflavanone                           | HSP90AA1 |
| <i>licorice</i> | licoisoflavanone                           | CDK2     |
| <i>licorice</i> | licoisoflavanone                           | PRSS1    |
| <i>licorice</i> | licoisoflavanone                           | PIM1     |
| <i>licorice</i> | licoisoflavanone                           | CCNA2    |
| <i>licorice</i> | licoisoflavanone                           | NCOA1    |
| <i>licorice</i> | licoisoflavanone                           | CALM2    |
| <i>licorice</i> | shinpterocarpin                            | NOS2     |
| <i>licorice</i> | shinpterocarpin                            | PTGS1    |
| <i>licorice</i> | shinpterocarpin                            | CHRM3    |
| <i>licorice</i> | shinpterocarpin                            | KCNH2    |
| <i>licorice</i> | shinpterocarpin                            | CHRM1    |
| <i>licorice</i> | shinpterocarpin                            | ESR1     |
| <i>licorice</i> | shinpterocarpin                            | AR       |
| <i>licorice</i> | shinpterocarpin                            | SCN5A    |
| <i>licorice</i> | shinpterocarpin                            | PPARG    |
| <i>licorice</i> | shinpterocarpin                            | PTGS2    |
| <i>licorice</i> | shinpterocarpin                            | RXRA     |
| <i>licorice</i> | shinpterocarpin                            | OPRD1    |
| <i>licorice</i> | shinpterocarpin                            | ADRA1B   |
| <i>licorice</i> | shinpterocarpin                            | ADRB2    |
| <i>licorice</i> | shinpterocarpin                            | ADRA1D   |
| <i>licorice</i> | shinpterocarpin                            | OPRM1    |
| <i>licorice</i> | shinpterocarpin                            | ESR2     |
| <i>licorice</i> | shinpterocarpin                            | MAPK14   |
| <i>licorice</i> | shinpterocarpin                            | GSK3B    |
| <i>licorice</i> | shinpterocarpin                            | CDK2     |
| <i>licorice</i> | shinpterocarpin                            | PIK3CG   |
| <i>licorice</i> | shinpterocarpin                            | CHRNA7   |
| <i>licorice</i> | shinpterocarpin                            | PKIA     |
| <i>licorice</i> | shinpterocarpin                            | PRSS1    |
| <i>licorice</i> | shinpterocarpin                            | PIM1     |
| <i>licorice</i> | shinpterocarpin                            | CCNA2    |
| <i>licorice</i> | shinpterocarpin                            | NCOA1    |
| <i>licorice</i> | shinpterocarpin                            | CALM2    |
| <i>licorice</i> | (E)-3-[3,4-dihydroxy-5-(3-methylbut-2-enyl | ESR1     |



|                 |                                            |          |
|-----------------|--------------------------------------------|----------|
| <i>licorice</i> | (E)-3-[3,4-dihydroxy-5-(3-methylbut-2-enyl | AR       |
| <i>licorice</i> | (E)-3-[3,4-dihydroxy-5-(3-methylbut-2-enyl | PPARG    |
| <i>licorice</i> | (E)-3-[3,4-dihydroxy-5-(3-methylbut-2-enyl | PTGS2    |
| <i>licorice</i> | (E)-3-[3,4-dihydroxy-5-(3-methylbut-2-enyl | MAPK14   |
| <i>licorice</i> | (E)-3-[3,4-dihydroxy-5-(3-methylbut-2-enyl | GSK3B    |
| <i>licorice</i> | (E)-3-[3,4-dihydroxy-5-(3-methylbut-2-enyl | HSP90AA1 |
| <i>licorice</i> | (E)-3-[3,4-dihydroxy-5-(3-methylbut-2-enyl | CDK2     |
| <i>licorice</i> | (E)-3-[3,4-dihydroxy-5-(3-methylbut-2-enyl | PIM1     |
| <i>licorice</i> | (E)-3-[3,4-dihydroxy-5-(3-methylbut-2-enyl | CCNA2    |
| <i>licorice</i> | (E)-3-[3,4-dihydroxy-5-(3-methylbut-2-enyl | NCOA2    |
| <i>licorice</i> | (E)-3-[3,4-dihydroxy-5-(3-methylbut-2-enyl | CALM2    |
| <i>licorice</i> | Glyzaglabrin                               | NOS2     |
| <i>licorice</i> | Glyzaglabrin                               | PTGS1    |
| <i>licorice</i> | Glyzaglabrin                               | ESR1     |
| <i>licorice</i> | Glyzaglabrin                               | AR       |
| <i>licorice</i> | Glyzaglabrin                               | PPARG    |
| <i>licorice</i> | Glyzaglabrin                               | PTGS2    |
| <i>licorice</i> | Glyzaglabrin                               | ESR2     |
| <i>licorice</i> | Glyzaglabrin                               | DPP4     |
| <i>licorice</i> | Glyzaglabrin                               | MAPK14   |
| <i>licorice</i> | Glyzaglabrin                               | GSK3B    |
| <i>licorice</i> | Glyzaglabrin                               | HSP90AA1 |
| <i>licorice</i> | Glyzaglabrin                               | CDK2     |
| <i>licorice</i> | Glyzaglabrin                               | PIK3CG   |
| <i>licorice</i> | Glyzaglabrin                               | CHEK1    |
| <i>licorice</i> | Glyzaglabrin                               | PKIA     |
| <i>licorice</i> | Glyzaglabrin                               | PRSS1    |
| <i>licorice</i> | Glyzaglabrin                               | PIM1     |
| <i>licorice</i> | Glyzaglabrin                               | CCNA2    |
| <i>licorice</i> | Glabranin                                  | NOS2     |
| <i>licorice</i> | Glabranin                                  | PTGS1    |
| <i>licorice</i> | Glabranin                                  | ESR1     |
| <i>licorice</i> | Glabranin                                  | SCN5A    |
| <i>licorice</i> | Glabranin                                  | F10      |
| <i>licorice</i> | Glabranin                                  | PTGS2    |
| <i>licorice</i> | Glabranin                                  | NOS3     |
| <i>licorice</i> | Glabranin                                  | PDE3A    |
| <i>licorice</i> | Glabranin                                  | HSP90AA1 |
| <i>licorice</i> | Glabranin                                  | PKIA     |
| <i>licorice</i> | Glabranin                                  | CALM2    |
| <i>licorice</i> | Glabrone                                   | NOS2     |
| <i>licorice</i> | Glabrone                                   | PTGS1    |
| <i>licorice</i> | Glabrone                                   | F2       |
| <i>licorice</i> | Glabrone                                   | ESR1     |
| <i>licorice</i> | Glabrone                                   | AR       |
| <i>licorice</i> | Glabrone                                   | SCN5A    |
| <i>licorice</i> | Glabrone                                   | PPARG    |
| <i>licorice</i> | Glabrone                                   | F10      |
| <i>licorice</i> | Glabrone                                   | PTGS2    |
| <i>licorice</i> | Glabrone                                   | RXRA     |
| <i>licorice</i> | Glabrone                                   | ACHE     |
| <i>licorice</i> | Glabrone                                   | ESR2     |
| <i>licorice</i> | Glabrone                                   | DPP4     |
| <i>licorice</i> | Glabrone                                   | MAPK14   |
| <i>licorice</i> | Glabrone                                   | GSK3B    |
| <i>licorice</i> | Glabrone                                   | CDK2     |
| <i>licorice</i> | Glabrone                                   | CHEK1    |
| <i>licorice</i> | Glabrone                                   | PRSS1    |

|                 |                                          |          |
|-----------------|------------------------------------------|----------|
| <i>licorice</i> | Glabrone                                 | PIM1     |
| <i>licorice</i> | Glabrone                                 | CCNA2    |
| <i>licorice</i> | Glabrone                                 | CALM2    |
| <i>licorice</i> | 1,3-dihydroxy-9-methoxy-6-benzofurano[3, | ESR1     |
| <i>licorice</i> | 1,3-dihydroxy-9-methoxy-6-benzofurano[3, | PPARG    |
| <i>licorice</i> | 1,3-dihydroxy-9-methoxy-6-benzofurano[3, | ESR2     |
| <i>licorice</i> | 1,3-dihydroxy-9-methoxy-6-benzofurano[3, | MAPK14   |
| <i>licorice</i> | 1,3-dihydroxy-9-methoxy-6-benzofurano[3, | GSK3B    |
| <i>licorice</i> | 1,3-dihydroxy-9-methoxy-6-benzofurano[3, | HSP90AA1 |
| <i>licorice</i> | 1,3-dihydroxy-9-methoxy-6-benzofurano[3, | CDK2     |
| <i>licorice</i> | 1,3-dihydroxy-9-methoxy-6-benzofurano[3, | CHEK1    |
| <i>licorice</i> | 1,3-dihydroxy-9-methoxy-6-benzofurano[3, | PKIA     |
| <i>licorice</i> | 1,3-dihydroxy-9-methoxy-6-benzofurano[3, | CCNA2    |
| <i>licorice</i> | 1,3-dihydroxy-8,9-dimethoxy-6-benzofuran | ESR1     |
| <i>licorice</i> | 1,3-dihydroxy-8,9-dimethoxy-6-benzofuran | AR       |
| <i>licorice</i> | 1,3-dihydroxy-8,9-dimethoxy-6-benzofuran | PPARG    |
| <i>licorice</i> | 1,3-dihydroxy-8,9-dimethoxy-6-benzofuran | MAPK14   |
| <i>licorice</i> | 1,3-dihydroxy-8,9-dimethoxy-6-benzofuran | GSK3B    |
| <i>licorice</i> | 1,3-dihydroxy-8,9-dimethoxy-6-benzofuran | HSP90AA1 |
| <i>licorice</i> | 1,3-dihydroxy-8,9-dimethoxy-6-benzofuran | CDK2     |
| <i>licorice</i> | 1,3-dihydroxy-8,9-dimethoxy-6-benzofuran | CHEK1    |
| <i>licorice</i> | 1,3-dihydroxy-8,9-dimethoxy-6-benzofuran | PKIA     |
| <i>licorice</i> | Eurycarpin A                             | NOS2     |
| <i>licorice</i> | Eurycarpin A                             | F2       |
| <i>licorice</i> | Eurycarpin A                             | ESR1     |
| <i>licorice</i> | Eurycarpin A                             | AR       |
| <i>licorice</i> | Eurycarpin A                             | SCN5A    |
| <i>licorice</i> | Eurycarpin A                             | PPARG    |
| <i>licorice</i> | Eurycarpin A                             | F10      |
| <i>licorice</i> | Eurycarpin A                             | PTGS2    |
| <i>licorice</i> | Eurycarpin A                             | ESR2     |
| <i>licorice</i> | Eurycarpin A                             | DPP4     |
| <i>licorice</i> | Eurycarpin A                             | MAPK14   |
| <i>licorice</i> | Eurycarpin A                             | GSK3B    |
| <i>licorice</i> | Eurycarpin A                             | HSP90AA1 |
| <i>licorice</i> | Eurycarpin A                             | CDK2     |
| <i>licorice</i> | Eurycarpin A                             | CHEK1    |
| <i>licorice</i> | Eurycarpin A                             | PRSS1    |
| <i>licorice</i> | Eurycarpin A                             | PIM1     |
| <i>licorice</i> | Eurycarpin A                             | CCNA2    |
| <i>licorice</i> | Eurycarpin A                             | CALM2    |
| <i>licorice</i> | Sigmoidin-B                              | ESR1     |
| <i>licorice</i> | Sigmoidin-B                              | F10      |
| <i>licorice</i> | Sigmoidin-B                              | PTGS2    |
| <i>licorice</i> | Sigmoidin-B                              | KDR      |
| <i>licorice</i> | Sigmoidin-B                              | HSP90AA1 |
| <i>licorice</i> | Sigmoidin-B                              | CALM2    |
| <i>licorice</i> | (2R)-7-hydroxy-2-(4-hydroxyphenyl)chrom  | PTGS1    |
| <i>licorice</i> | (2R)-7-hydroxy-2-(4-hydroxyphenyl)chrom  | ESR1     |
| <i>licorice</i> | (2R)-7-hydroxy-2-(4-hydroxyphenyl)chrom  | PTGS2    |
| <i>licorice</i> | (2R)-7-hydroxy-2-(4-hydroxyphenyl)chrom  | RXRA     |
| <i>licorice</i> | (2R)-7-hydroxy-2-(4-hydroxyphenyl)chrom  | PDE3A    |
| <i>licorice</i> | (2R)-7-hydroxy-2-(4-hydroxyphenyl)chrom  | ADRB2    |
| <i>licorice</i> | (2R)-7-hydroxy-2-(4-hydroxyphenyl)chrom  | HSP90AA1 |
| <i>licorice</i> | (2R)-7-hydroxy-2-(4-hydroxyphenyl)chrom  | PIK3CG   |
| <i>licorice</i> | (2R)-7-hydroxy-2-(4-hydroxyphenyl)chrom  | LACTBL1  |
| <i>licorice</i> | (2R)-7-hydroxy-2-(4-hydroxyphenyl)chrom  | MAOB     |
| <i>licorice</i> | (2R)-7-hydroxy-2-(4-hydroxyphenyl)chrom  | PKIA     |

|                 |                                           |          |
|-----------------|-------------------------------------------|----------|
| <i>licorice</i> | (2R)-7-hydroxy-2-(4-hydroxyphenyl)chrom   | PKIA     |
| <i>licorice</i> | (2R)-7-hydroxy-2-(4-hydroxyphenyl)chrom   | CALM2    |
| <i>licorice</i> | (2R)-7-hydroxy-2-(4-hydroxyphenyl)chrom   | GABRA1   |
| <i>licorice</i> | (2R)-7-hydroxy-2-(4-hydroxyphenyl)chrom   | SLC6A4   |
| <i>licorice</i> | (2S)-7-hydroxy-2-(4-hydroxyphenyl)-8-(3-r | NOS2     |
| <i>licorice</i> | (2S)-7-hydroxy-2-(4-hydroxyphenyl)-8-(3-r | PTGS1    |
| <i>licorice</i> | (2S)-7-hydroxy-2-(4-hydroxyphenyl)-8-(3-r | ESR1     |
| <i>licorice</i> | (2S)-7-hydroxy-2-(4-hydroxyphenyl)-8-(3-r | SCN5A    |
| <i>licorice</i> | (2S)-7-hydroxy-2-(4-hydroxyphenyl)-8-(3-r | F10      |
| <i>licorice</i> | (2S)-7-hydroxy-2-(4-hydroxyphenyl)-8-(3-r | PTGS2    |
| <i>licorice</i> | (2S)-7-hydroxy-2-(4-hydroxyphenyl)-8-(3-r | PDE3A    |
| <i>licorice</i> | (2S)-7-hydroxy-2-(4-hydroxyphenyl)-8-(3-r | ADRA1B   |
| <i>licorice</i> | (2S)-7-hydroxy-2-(4-hydroxyphenyl)-8-(3-r | ADRB2    |
| <i>licorice</i> | (2S)-7-hydroxy-2-(4-hydroxyphenyl)-8-(3-r | ESR2     |
| <i>licorice</i> | (2S)-7-hydroxy-2-(4-hydroxyphenyl)-8-(3-r | HSP90AA1 |
| <i>licorice</i> | (2S)-7-hydroxy-2-(4-hydroxyphenyl)-8-(3-r | CALM2    |
| <i>licorice</i> | Isoglycyrol                               | NOS2     |
| <i>licorice</i> | Isoglycyrol                               | ESR1     |
| <i>licorice</i> | Isoglycyrol                               | AR       |
| <i>licorice</i> | Isoglycyrol                               | PTGS2    |
| <i>licorice</i> | Isoglycyrol                               | DPP4     |
| <i>licorice</i> | Isoglycyrol                               | GSK3B    |
| <i>licorice</i> | Isoglycyrol                               | PIM1     |
| <i>licorice</i> | Isolicoflavonol                           | NOS2     |
| <i>licorice</i> | Isolicoflavonol                           | F2       |
| <i>licorice</i> | Isolicoflavonol                           | ESR1     |
| <i>licorice</i> | Isolicoflavonol                           | AR       |
| <i>licorice</i> | Isolicoflavonol                           | PPARG    |
| <i>licorice</i> | Isolicoflavonol                           | F10      |
| <i>licorice</i> | Isolicoflavonol                           | PTGS2    |
| <i>licorice</i> | Isolicoflavonol                           | GSK3B    |
| <i>licorice</i> | Isolicoflavonol                           | HSP90AA1 |
| <i>licorice</i> | Isolicoflavonol                           | CDK2     |
| <i>licorice</i> | Isolicoflavonol                           | PRSS1    |
| <i>licorice</i> | Isolicoflavonol                           | PIM1     |
| <i>licorice</i> | Isolicoflavonol                           | CCNA2    |
| <i>licorice</i> | Isolicoflavonol                           | NCOA2    |
| <i>licorice</i> | Isolicoflavonol                           | CALM2    |
| <i>licorice</i> | HMO                                       | NOS2     |
| <i>licorice</i> | HMO                                       | PTGS1    |
| <i>licorice</i> | HMO                                       | CHRM1    |
| <i>licorice</i> | HMO                                       | ESR1     |
| <i>licorice</i> | HMO                                       | AR       |
| <i>licorice</i> | HMO                                       | SCN5A    |
| <i>licorice</i> | HMO                                       | PPARG    |
| <i>licorice</i> | HMO                                       | PTGS2    |
| <i>licorice</i> | HMO                                       | RXRA     |
| <i>licorice</i> | HMO                                       | PDE3A    |
| <i>licorice</i> | HMO                                       | SLC6A3   |
| <i>licorice</i> | HMO                                       | ADRB2    |
| <i>licorice</i> | HMO                                       | SLC6A4   |
| <i>licorice</i> | HMO                                       | ESR2     |
| <i>licorice</i> | HMO                                       | DPP4     |
| <i>licorice</i> | HMO                                       | MAPK14   |
| <i>licorice</i> | HMO                                       | GSK3B    |
| <i>licorice</i> | HMO                                       | CDK2     |
| <i>licorice</i> | HMO                                       | MAOB     |
| <i>licorice</i> | HMO                                       | CHEK1    |

|                 |                          |          |
|-----------------|--------------------------|----------|
| <i>licorice</i> | HMO                      | PKIA     |
| <i>licorice</i> | HMO                      | PRSS1    |
| <i>licorice</i> | HMO                      | PIM1     |
| <i>licorice</i> | HMO                      | CCNA2    |
| <i>licorice</i> | HMO                      | PKIA     |
| <i>licorice</i> | HMO                      | CALM2    |
| <i>licorice</i> | 1-Methoxyphaseollidin    | NOS2     |
| <i>licorice</i> | 1-Methoxyphaseollidin    | PTGS1    |
| <i>licorice</i> | 1-Methoxyphaseollidin    | F2       |
| <i>licorice</i> | 1-Methoxyphaseollidin    | KCNH2    |
| <i>licorice</i> | 1-Methoxyphaseollidin    | ESR1     |
| <i>licorice</i> | 1-Methoxyphaseollidin    | AR       |
| <i>licorice</i> | 1-Methoxyphaseollidin    | SCN5A    |
| <i>licorice</i> | 1-Methoxyphaseollidin    | PPARG    |
| <i>licorice</i> | 1-Methoxyphaseollidin    | F10      |
| <i>licorice</i> | 1-Methoxyphaseollidin    | PTGS2    |
| <i>licorice</i> | 1-Methoxyphaseollidin    | NOS3     |
| <i>licorice</i> | 1-Methoxyphaseollidin    | KDR      |
| <i>licorice</i> | 1-Methoxyphaseollidin    | RXRA     |
| <i>licorice</i> | 1-Methoxyphaseollidin    | ADRA1B   |
| <i>licorice</i> | 1-Methoxyphaseollidin    | ADRB2    |
| <i>licorice</i> | 1-Methoxyphaseollidin    | ADRA1D   |
| <i>licorice</i> | 1-Methoxyphaseollidin    | TOP2A    |
| <i>licorice</i> | 1-Methoxyphaseollidin    | ESR2     |
| <i>licorice</i> | 1-Methoxyphaseollidin    | MAPK14   |
| <i>licorice</i> | 1-Methoxyphaseollidin    | GSK3B    |
| <i>licorice</i> | 1-Methoxyphaseollidin    | HSP90AA1 |
| <i>licorice</i> | 1-Methoxyphaseollidin    | CDK2     |
| <i>licorice</i> | 1-Methoxyphaseollidin    | PIK3CG   |
| <i>licorice</i> | 1-Methoxyphaseollidin    | PRSS1    |
| <i>licorice</i> | 1-Methoxyphaseollidin    | PIM1     |
| <i>licorice</i> | 1-Methoxyphaseollidin    | CCNA2    |
| <i>licorice</i> | 1-Methoxyphaseollidin    | NCOA2    |
| <i>licorice</i> | 1-Methoxyphaseollidin    | NCOA1    |
| <i>licorice</i> | 1-Methoxyphaseollidin    | CALM2    |
| <i>licorice</i> | Quercetin der.           | NOS2     |
| <i>licorice</i> | Quercetin der.           | PTGS1    |
| <i>licorice</i> | Quercetin der.           | ESR1     |
| <i>licorice</i> | Quercetin der.           | AR       |
| <i>licorice</i> | Quercetin der.           | SCN5A    |
| <i>licorice</i> | Quercetin der.           | PPARG    |
| <i>licorice</i> | Quercetin der.           | PTGS2    |
| <i>licorice</i> | Quercetin der.           | PTPN1    |
| <i>licorice</i> | Quercetin der.           | ESR2     |
| <i>licorice</i> | Quercetin der.           | DPP4     |
| <i>licorice</i> | Quercetin der.           | MAPK14   |
| <i>licorice</i> | Quercetin der.           | GSK3B    |
| <i>licorice</i> | Quercetin der.           | HSP90AA1 |
| <i>licorice</i> | Quercetin der.           | CDK2     |
| <i>licorice</i> | Quercetin der.           | PRSS1    |
| <i>licorice</i> | Quercetin der.           | NCOA2    |
| <i>licorice</i> | Quercetin der.           | CALM2    |
| <i>licorice</i> | 6-prenylated eriodictyol | NOS2     |
| <i>licorice</i> | 6-prenylated eriodictyol | ESR1     |
| <i>licorice</i> | 6-prenylated eriodictyol | SCN5A    |
| <i>licorice</i> | 6-prenylated eriodictyol | F10      |
| <i>licorice</i> | 6-prenylated eriodictyol | PTGS2    |
| <i>licorice</i> | 6-prenylated eriodictyol | F7       |

|                 |                              |          |
|-----------------|------------------------------|----------|
| <i>licorice</i> | 6-prenylated eriodictyol     | HSP90AA1 |
| <i>licorice</i> | 6-prenylated eriodictyol     | CALM2    |
| <i>licorice</i> | 7-Acetoxy-2-methylisoflavone | NOS2     |
| <i>licorice</i> | 7-Acetoxy-2-methylisoflavone | PTGS1    |
| <i>licorice</i> | 7-Acetoxy-2-methylisoflavone | F2       |
| <i>licorice</i> | 7-Acetoxy-2-methylisoflavone | ESR1     |
| <i>licorice</i> | 7-Acetoxy-2-methylisoflavone | AR       |
| <i>licorice</i> | 7-Acetoxy-2-methylisoflavone | SCN5A    |
| <i>licorice</i> | 7-Acetoxy-2-methylisoflavone | PPARG    |
| <i>licorice</i> | 7-Acetoxy-2-methylisoflavone | PTGS2    |
| <i>licorice</i> | 7-Acetoxy-2-methylisoflavone | NOS3     |
| <i>licorice</i> | 7-Acetoxy-2-methylisoflavone | RXRA     |
| <i>licorice</i> | 7-Acetoxy-2-methylisoflavone | ACHE     |
| <i>licorice</i> | 7-Acetoxy-2-methylisoflavone | PDE3A    |
| <i>licorice</i> | 7-Acetoxy-2-methylisoflavone | ADRA1B   |
| <i>licorice</i> | 7-Acetoxy-2-methylisoflavone | ADRB2    |
| <i>licorice</i> | 7-Acetoxy-2-methylisoflavone | ADRA1D   |
| <i>licorice</i> | 7-Acetoxy-2-methylisoflavone | GABRA1   |
| <i>licorice</i> | 7-Acetoxy-2-methylisoflavone | DPP4     |
| <i>licorice</i> | 7-Acetoxy-2-methylisoflavone | MAPK14   |
| <i>licorice</i> | 7-Acetoxy-2-methylisoflavone | GSK3B    |
| <i>licorice</i> | 7-Acetoxy-2-methylisoflavone | HSP90AA1 |
| <i>licorice</i> | 7-Acetoxy-2-methylisoflavone | CDK2     |
| <i>licorice</i> | 7-Acetoxy-2-methylisoflavone | CHEK1    |
| <i>licorice</i> | 7-Acetoxy-2-methylisoflavone | PRSS1    |
| <i>licorice</i> | 7-Acetoxy-2-methylisoflavone | NCOA2    |
| <i>licorice</i> | 7-Acetoxy-2-methylisoflavone | CALM2    |
| <i>licorice</i> | 8-prenylated eriodictyol     | ESR1     |
| <i>licorice</i> | 8-prenylated eriodictyol     | SCN5A    |
| <i>licorice</i> | 8-prenylated eriodictyol     | F10      |
| <i>licorice</i> | 8-prenylated eriodictyol     | PTGS2    |
| <i>licorice</i> | 8-prenylated eriodictyol     | F7       |
| <i>licorice</i> | 8-prenylated eriodictyol     | HSP90AA1 |
| <i>licorice</i> | 8-prenylated eriodictyol     | NCOA1    |
| <i>licorice</i> | 8-prenylated eriodictyol     | CALM2    |
| <i>licorice</i> | Gancaonin G                  | NOS2     |
| <i>licorice</i> | Gancaonin G                  | F2       |
| <i>licorice</i> | Gancaonin G                  | ESR1     |
| <i>licorice</i> | Gancaonin G                  | AR       |
| <i>licorice</i> | Gancaonin G                  | PPARG    |
| <i>licorice</i> | Gancaonin G                  | F10      |
| <i>licorice</i> | Gancaonin G                  | PTGS2    |
| <i>licorice</i> | Gancaonin G                  | NOS3     |
| <i>licorice</i> | Gancaonin G                  | TOP2A    |
| <i>licorice</i> | Gancaonin G                  | ESR2     |
| <i>licorice</i> | Gancaonin G                  | DPP4     |
| <i>licorice</i> | Gancaonin G                  | MAPK14   |
| <i>licorice</i> | Gancaonin G                  | GSK3B    |
| <i>licorice</i> | Gancaonin G                  | HSP90AA1 |
| <i>licorice</i> | Gancaonin G                  | CHEK1    |
| <i>licorice</i> | Gancaonin G                  | PRSS1    |
| <i>licorice</i> | Gancaonin G                  | PIM1     |
| <i>licorice</i> | Gancaonin G                  | CCNA2    |
| <i>licorice</i> | Gancaonin G                  | NCOA2    |
| <i>licorice</i> | Gancaonin G                  | CALM2    |
| <i>licorice</i> | Gancaonin H                  | ESR1     |
| <i>licorice</i> | Gancaonin H                  | AR       |
| <i>licorice</i> | Gancaonin H                  | F10      |

|                 |                |          |
|-----------------|----------------|----------|
| <i>licorice</i> | Gancaonin H    | PTGS2    |
| <i>licorice</i> | Gancaonin H    | KDR      |
| <i>licorice</i> | Gancaonin H    | TOP2A    |
| <i>licorice</i> | Gancaonin H    | HSP90AA1 |
| <i>licorice</i> | Gancaonin H    | PRSS1    |
| <i>licorice</i> | Gancaonin H    | PIM1     |
| <i>licorice</i> | Gancaonin H    | CCNA2    |
| <i>licorice</i> | Gancaonin H    | NCOA2    |
| <i>licorice</i> | Gancaonin H    | CALM2    |
| <i>licorice</i> | Licoagrocarpin | NOS2     |
| <i>licorice</i> | Licoagrocarpin | PTGS1    |
| <i>licorice</i> | Licoagrocarpin | CHRM3    |
| <i>licorice</i> | Licoagrocarpin | F2       |
| <i>licorice</i> | Licoagrocarpin | KCNH2    |
| <i>licorice</i> | Licoagrocarpin | CHRM1    |
| <i>licorice</i> | Licoagrocarpin | ESR1     |
| <i>licorice</i> | Licoagrocarpin | AR       |
| <i>licorice</i> | Licoagrocarpin | SCN5A    |
| <i>licorice</i> | Licoagrocarpin | PPARG    |
| <i>licorice</i> | Licoagrocarpin | F10      |
| <i>licorice</i> | Licoagrocarpin | CHRM5    |
| <i>licorice</i> | Licoagrocarpin | PTGS2    |
| <i>licorice</i> | Licoagrocarpin | NOS3     |
| <i>licorice</i> | Licoagrocarpin | RXRA     |
| <i>licorice</i> | Licoagrocarpin | ACHE     |
| <i>licorice</i> | Licoagrocarpin | ADRA1B   |
| <i>licorice</i> | Licoagrocarpin | ADRB2    |
| <i>licorice</i> | Licoagrocarpin | ESR2     |
| <i>licorice</i> | Licoagrocarpin | MAPK14   |
| <i>licorice</i> | Licoagrocarpin | GSK3B    |
| <i>licorice</i> | Licoagrocarpin | HSP90AA1 |
| <i>licorice</i> | Licoagrocarpin | CDK2     |
| <i>licorice</i> | Licoagrocarpin | PRSS1    |
| <i>licorice</i> | Licoagrocarpin | PIM1     |
| <i>licorice</i> | Licoagrocarpin | CCNA2    |
| <i>licorice</i> | Licoagrocarpin | NCOA2    |
| <i>licorice</i> | Licoagrocarpin | CALM2    |
| <i>licorice</i> | Glyasperins M  | NOS2     |
| <i>licorice</i> | Glyasperins M  | PTGS1    |
| <i>licorice</i> | Glyasperins M  | KCNH2    |
| <i>licorice</i> | Glyasperins M  | ESR1     |
| <i>licorice</i> | Glyasperins M  | AR       |
| <i>licorice</i> | Glyasperins M  | SCN5A    |
| <i>licorice</i> | Glyasperins M  | PPARG    |
| <i>licorice</i> | Glyasperins M  | F10      |
| <i>licorice</i> | Glyasperins M  | PTGS2    |
| <i>licorice</i> | Glyasperins M  | F7       |
| <i>licorice</i> | Glyasperins M  | KDR      |
| <i>licorice</i> | Glyasperins M  | ACHE     |
| <i>licorice</i> | Glyasperins M  | TOP2A    |
| <i>licorice</i> | Glyasperins M  | ESR2     |
| <i>licorice</i> | Glyasperins M  | PPARD    |
| <i>licorice</i> | Glyasperins M  | GSK3B    |
| <i>licorice</i> | Glyasperins M  | HSP90AA1 |
| <i>licorice</i> | Glyasperins M  | CDK2     |
| <i>licorice</i> | Glyasperins M  | PKIA     |
| <i>licorice</i> | Glyasperins M  | PRSS1    |
| <i>licorice</i> | Glyasperins M  | PIM1     |

|                 |                    |          |
|-----------------|--------------------|----------|
| <i>licorice</i> | Glyasperins M      | CCNA2    |
| <i>licorice</i> | Glyasperins M      | NCOA2    |
| <i>licorice</i> | Glyasperins M      | NCOA1    |
| <i>licorice</i> | Glyasperins M      | KCNMA1   |
| <i>licorice</i> | Glyasperins M      | CALM2    |
| <i>licorice</i> | Licoagroisoflavone | NOS2     |
| <i>licorice</i> | Licoagroisoflavone | F2       |
| <i>licorice</i> | Licoagroisoflavone | ESR1     |
| <i>licorice</i> | Licoagroisoflavone | AR       |
| <i>licorice</i> | Licoagroisoflavone | SCN5A    |
| <i>licorice</i> | Licoagroisoflavone | PPARG    |
| <i>licorice</i> | Licoagroisoflavone | F10      |
| <i>licorice</i> | Licoagroisoflavone | PTGS2    |
| <i>licorice</i> | Licoagroisoflavone | ESR2     |
| <i>licorice</i> | Licoagroisoflavone | DPP4     |
| <i>licorice</i> | Licoagroisoflavone | MAPK14   |
| <i>licorice</i> | Licoagroisoflavone | GSK3B    |
| <i>licorice</i> | Licoagroisoflavone | CDK2     |
| <i>licorice</i> | Licoagroisoflavone | CHEK1    |
| <i>licorice</i> | Licoagroisoflavone | PRSS1    |
| <i>licorice</i> | Licoagroisoflavone | PIM1     |
| <i>licorice</i> | Licoagroisoflavone | CCNA2    |
| <i>licorice</i> | Licoagroisoflavone | CALM2    |
| <i>licorice</i> | Odoratin           | NOS2     |
| <i>licorice</i> | Odoratin           | PTGS1    |
| <i>licorice</i> | Odoratin           | ESR1     |
| <i>licorice</i> | Odoratin           | AR       |
| <i>licorice</i> | Odoratin           | SCN5A    |
| <i>licorice</i> | Odoratin           | PPARG    |
| <i>licorice</i> | Odoratin           | PTGS2    |
| <i>licorice</i> | Odoratin           | RXRA     |
| <i>licorice</i> | Odoratin           | ESR2     |
| <i>licorice</i> | Odoratin           | DPP4     |
| <i>licorice</i> | Odoratin           | MAPK14   |
| <i>licorice</i> | Odoratin           | GSK3B    |
| <i>licorice</i> | Odoratin           | HSP90AA1 |
| <i>licorice</i> | Odoratin           | CDK2     |
| <i>licorice</i> | Odoratin           | CHEK1    |
| <i>licorice</i> | Odoratin           | PRSS1    |
| <i>licorice</i> | Odoratin           | PIM1     |
| <i>licorice</i> | Odoratin           | CCNA2    |
| <i>licorice</i> | Odoratin           | NCOA2    |
| <i>licorice</i> | Odoratin           | CALM2    |
| <i>licorice</i> | Phaseol            | F2       |
| <i>licorice</i> | Phaseol            | ESR1     |
| <i>licorice</i> | Phaseol            | AR       |
| <i>licorice</i> | Phaseol            | PPARG    |
| <i>licorice</i> | Phaseol            | PTGS2    |
| <i>licorice</i> | Phaseol            | KDR      |
| <i>licorice</i> | Phaseol            | MAPK14   |
| <i>licorice</i> | Phaseol            | GSK3B    |
| <i>licorice</i> | Phaseol            | HSP90AA1 |
| <i>licorice</i> | Phaseol            | CDK2     |
| <i>licorice</i> | Phaseol            | CHEK1    |
| <i>licorice</i> | Phaseol            | PKIA     |
| <i>licorice</i> | Phaseol            | PIM1     |
| <i>licorice</i> | Phaseol            | CCNA2    |
| <i>licorice</i> | Xambioona          | NOS2     |

|                                  |                        |          |
|----------------------------------|------------------------|----------|
| <i>licorice</i>                  | Xambioona              | ESR1     |
| <i>licorice</i>                  | Xambioona              | F10      |
| <i>licorice</i>                  | Xambioona              | PTGS2    |
| <i>licorice</i>                  | Xambioona              | ESR2     |
| <i>licorice</i>                  | Xambioona              | PIM1     |
| <i>licorice</i>                  | Xambioona              | NCOA2    |
| <i>licorice</i>                  | Xambioona              | CALM2    |
| <i>Chimonanthus salicifolius</i> | luteolin-5-O-glucoside | TNF      |
| <i>Chimonanthus salicifolius</i> | luteolin-5-O-glucoside | IL2      |
| <i>Chimonanthus salicifolius</i> | Quercetin              | NOX4     |
| <i>Chimonanthus salicifolius</i> | Quercetin              | AVPR2    |
| <i>Chimonanthus salicifolius</i> | Quercetin              | AKR1B1   |
| <i>Chimonanthus salicifolius</i> | Quercetin              | XDH      |
| <i>Chimonanthus salicifolius</i> | Quercetin              | MAOA     |
| <i>Chimonanthus salicifolius</i> | Quercetin              | IGF1R    |
| <i>Chimonanthus salicifolius</i> | Quercetin              | FLT3     |
| <i>Chimonanthus salicifolius</i> | Quercetin              | CYP19A1  |
| <i>Chimonanthus salicifolius</i> | Quercetin              | EGFR     |
| <i>Chimonanthus salicifolius</i> | Quercetin              | F2       |
| <i>Chimonanthus salicifolius</i> | Quercetin              | CA2      |
| <i>Chimonanthus salicifolius</i> | Quercetin              | PIM1     |
| <i>Chimonanthus salicifolius</i> | Quercetin              | ALOX5    |
| <i>Chimonanthus salicifolius</i> | Quercetin              | AURKB    |
| <i>Chimonanthus salicifolius</i> | Quercetin              | DRD4     |
| <i>Chimonanthus salicifolius</i> | Quercetin              | ADORA1   |
| <i>Chimonanthus salicifolius</i> | Quercetin              | CA7      |
| <i>Chimonanthus salicifolius</i> | Quercetin              | GLO1     |
| <i>Chimonanthus salicifolius</i> | Quercetin              | MPO      |
| <i>Chimonanthus salicifolius</i> | Quercetin              | PIK3R1   |
| <i>Chimonanthus salicifolius</i> | Quercetin              | ADORA2A  |
| <i>Chimonanthus salicifolius</i> | Quercetin              | DAPK1    |
| <i>Chimonanthus salicifolius</i> | Quercetin              | PYGL     |
| <i>Chimonanthus salicifolius</i> | Quercetin              | CA1      |
| <i>Chimonanthus salicifolius</i> | Quercetin              | GSK3B    |
| <i>Chimonanthus salicifolius</i> | Quercetin              | SRC      |
| <i>Chimonanthus salicifolius</i> | Quercetin              | PTK2     |
| <i>Chimonanthus salicifolius</i> | Quercetin              | HSD17B2  |
| <i>Chimonanthus salicifolius</i> | Quercetin              | KDR      |
| <i>Chimonanthus salicifolius</i> | Quercetin              | MMP13    |
| <i>Chimonanthus salicifolius</i> | kaempferol             | NOS2     |
| <i>Chimonanthus salicifolius</i> | kaempferol             | PTGS1    |
| <i>Chimonanthus salicifolius</i> | kaempferol             | AR       |
| <i>Chimonanthus salicifolius</i> | kaempferol             | PPARG    |
| <i>Chimonanthus salicifolius</i> | kaempferol             | PTGS2    |
| <i>Chimonanthus salicifolius</i> | kaempferol             | HSP90AA1 |
| <i>Chimonanthus salicifolius</i> | kaempferol             | PIK3CG   |
| <i>Chimonanthus salicifolius</i> | kaempferol             | PKIA     |
| <i>Chimonanthus salicifolius</i> | kaempferol             | NCOA2    |
| <i>Chimonanthus salicifolius</i> | kaempferol             | DPP4     |
| <i>Chimonanthus salicifolius</i> | kaempferol             | PRSS1    |
| <i>Chimonanthus salicifolius</i> | kaempferol             | PGR      |
| <i>Chimonanthus salicifolius</i> | kaempferol             | F2       |
| <i>Chimonanthus salicifolius</i> | kaempferol             | CHRM1    |
| <i>Chimonanthus salicifolius</i> | kaempferol             | NOS3     |
| <i>Chimonanthus salicifolius</i> | kaempferol             | GABRA2   |
| <i>Chimonanthus salicifolius</i> | kaempferol             | ACHE     |
| <i>Chimonanthus salicifolius</i> | kaempferol             | SLC6A2   |
| <i>Chimonanthus salicifolius</i> | kaempferol             | CHRM2    |



|                                  |            |        |
|----------------------------------|------------|--------|
| <i>Chimonanthus salicifolius</i> | kaempferol | ADRA1B |
| <i>Chimonanthus salicifolius</i> | kaempferol | GABRA1 |
| <i>Chimonanthus salicifolius</i> | kaempferol | TOP2A  |
| <i>Chimonanthus salicifolius</i> | kaempferol | F7     |
| <i>Chimonanthus salicifolius</i> | kaempferol | CALM2  |
| <i>Chimonanthus salicifolius</i> | kaempferol | RELA   |
| <i>Chimonanthus salicifolius</i> | kaempferol | IKBKB  |
| <i>Chimonanthus salicifolius</i> | kaempferol | AKT1   |
| <i>Chimonanthus salicifolius</i> | kaempferol | BCL2   |
| <i>Chimonanthus salicifolius</i> | kaempferol | BAX    |
| <i>Chimonanthus salicifolius</i> | kaempferol | CD40LG |
| <i>Chimonanthus salicifolius</i> | kaempferol | JUN    |
| <i>Chimonanthus salicifolius</i> | kaempferol | AHSA1  |
| <i>Chimonanthus salicifolius</i> | kaempferol | CASP3  |
| <i>Chimonanthus salicifolius</i> | kaempferol | MAPK8  |
| <i>Chimonanthus salicifolius</i> | kaempferol | XDH    |
| <i>Chimonanthus salicifolius</i> | kaempferol | MMP1   |
| <i>Chimonanthus salicifolius</i> | kaempferol | STAT1  |
| <i>Chimonanthus salicifolius</i> | kaempferol | CDK1   |
| <i>Chimonanthus salicifolius</i> | kaempferol | PPARG  |
| <i>Chimonanthus salicifolius</i> | kaempferol | HMOX1  |
| <i>Chimonanthus salicifolius</i> | kaempferol | CYP3A4 |
| <i>Chimonanthus salicifolius</i> | kaempferol | CYP1A1 |
| <i>Chimonanthus salicifolius</i> | kaempferol | ICAM1  |
| <i>Chimonanthus salicifolius</i> | kaempferol | SELE   |
| <i>Chimonanthus salicifolius</i> | kaempferol | VCAM1  |
| <i>Chimonanthus salicifolius</i> | kaempferol | NR1I2  |
| <i>Chimonanthus salicifolius</i> | kaempferol | CYP1B1 |
| <i>Chimonanthus salicifolius</i> | kaempferol | ALOX5  |
| <i>Chimonanthus salicifolius</i> | kaempferol | HAS2   |
| <i>Chimonanthus salicifolius</i> | kaempferol | AHR    |
| <i>Chimonanthus salicifolius</i> | kaempferol | PSMD3  |
| <i>Chimonanthus salicifolius</i> | kaempferol | SLC2A4 |
| <i>Chimonanthus salicifolius</i> | kaempferol | NR1I3  |
| <i>Chimonanthus salicifolius</i> | kaempferol | INSR   |
| <i>Chimonanthus salicifolius</i> | kaempferol | DIO1   |
| <i>Chimonanthus salicifolius</i> | kaempferol | GSTM1  |
| <i>Chimonanthus salicifolius</i> | kaempferol | GSTM2  |
| <i>Chimonanthus salicifolius</i> | kaempferol | AKR1C3 |
| <i>Chimonanthus salicifolius</i> | kaempferol | SLPI   |
